# Supplementary material for: Retrospective Observational Study on the Characteristics of Pain and Associated Factors of Breakthrough Pain in Advanced Cancer Patients
Source: PubMed Central journal article supplement (PMC9023204; doi:10.1155/2022/8943292), 2022-04-14
Supplement: 8943292.f1.pdf [file 8943292.f1.pdf]

Supplementary Material:extraction form and raw data of the participants

| Number | Age | Gender (1male;<br>2female) | Education level(1Primary;<br>2Middle school; 3Graduate<br>and above) | Spouse(1yes;<br>2no) | Present<br>residence(1city;<br>2rural) | BMI | Bone<br>metastasis(1yes;<br>0no) | Lung<br>metastasis(1yes;<br>0no) | Lymph<br>metastasis(1yes;<br>0no) |
|--------|-----|----------------------------|----------------------------------------------------------------------|----------------------|----------------------------------------|-----|----------------------------------|----------------------------------|-----------------------------------|
| 1      | 41  | 1                          | 2                                                                    | 1                    | 2                                      | 1   | 0                                | 0                                | 0                                 |
| 2      | 72  | 1                          | 2                                                                    | 1                    | 1                                      | 2   | 0                                | 0                                | 0                                 |
| 3      | 57  | 2                          | 2                                                                    | 1                    | 2                                      | 1   | 1                                | 0                                | 0                                 |
| 4      | 44  | 1                          | 2                                                                    | 1                    | 2                                      | 1   | 1                                | 1                                | 1                                 |
| 5      | 55  | 2                          | 2                                                                    | 1                    | 1                                      | 2   | 0                                | 0                                | 0                                 |
| 6      | 62  | 1                          | 2                                                                    | 1                    | 1                                      | 4   | 0                                | 0                                | 0                                 |
| 7      | 68  | 1                          | 3                                                                    | 1                    | 1                                      | 2   | 1                                | 0                                | 0                                 |
| 8      | 69  | 1                          | 2                                                                    | 1                    | 2                                      | 1   | 0                                | 0                                | 0                                 |
| 9      | 67  | 1                          | 3                                                                    | 1                    | 1                                      | 2   | 1                                | 0                                | 0                                 |
| 10     | 57  | 1                          | 3                                                                    | 1                    | 1                                      | 2   | 0                                | 0                                | 1                                 |
| 11     | 55  | 1                          | 3                                                                    | 1                    | 1                                      | 3   | 1                                | 1                                | 0                                 |
| 12     | 49  | 2                          | 2                                                                    | 1                    | 1                                      | 1   | 1                                | 0                                | 0                                 |
| 13     | 47  | 2                          | 2                                                                    | 1                    | 1                                      | 2   | 1                                | 0                                | 1                                 |
| 14     | 61  | 1                          | 2                                                                    | 1                    | 2                                      | 2   | 1                                | 0                                | 0                                 |
| 15     | 57  | 1                          | 3                                                                    | 1                    | 2                                      | 1   | 0                                | 0                                | 0                                 |
| 16     | 61  | 1                          | 2                                                                    | 1                    | 1                                      | 1   | 0                                | 0                                | 0                                 |
| 17     | 85  | 1                          | 2                                                                    | 1                    | 1                                      | 2   | 0                                | 0                                | 0                                 |

|    |    |   |   |   |   |   |   |   |   |
|----|----|---|---|---|---|---|---|---|---|
| 18 | 77 | 2 | 1 | 1 | 2 | 1 | 0 | 0 | 0 |
| 19 | 52 | 2 | 2 | 1 | 2 | 2 | 0 | 0 | 1 |
| 20 | 44 | 2 | 1 | 1 | 2 | 2 | 0 | 0 | 1 |
| 21 | 58 | 2 | 1 | 1 | 1 | 4 | 0 | 1 | 0 |
| 22 | 36 | 2 | 3 | 1 | 1 | 1 | 0 | 0 | 1 |
| 23 | 48 | 1 | 2 | 1 | 2 | 2 | 1 | 0 | 0 |
| 24 | 62 | 1 | 1 | 1 | 2 | 2 | 0 | 0 | 0 |
| 25 | 69 | 1 | 3 | 1 | 2 | 2 | 1 | 0 | 1 |
| 26 | 65 | 1 | 2 | 1 | 1 | 2 | 1 | 1 | 0 |
| 27 | 63 | 1 | 1 | 1 | 2 | 2 | 1 | 0 | 0 |
| 28 | 52 | 2 | 2 | 1 | 2 | 2 | 0 | 0 | 0 |
| 29 | 50 | 1 | 2 | 1 | 1 | 1 | 1 | 1 | 0 |
| 30 | 55 | 2 | 3 | 1 | 1 | 3 | 1 | 0 | 1 |
| 31 | 47 | 2 | 2 | 1 | 1 | 1 | 0 | 0 | 0 |
| 32 | 32 | 2 | 3 | 1 | 1 | 4 | 0 | 0 | 1 |
| 33 | 57 | 2 | 2 | 1 | 2 | 3 | 1 | 0 | 1 |
| 34 | 69 | 2 | 1 | 1 | 1 | 2 | 1 | 0 | 0 |
| 35 | 61 | 2 | 2 | 1 | 1 | 2 | 1 | 0 | 1 |
| 36 | 53 | 2 | 2 | 1 | 1 | 2 | 1 | 0 | 0 |
| 37 | 40 | 2 | 3 | 2 | 1 | 2 | 0 | 1 | 0 |
| 38 | 61 | 2 | 2 | 1 | 1 | 2 | 0 | 0 | 1 |
| 39 | 78 | 2 | 1 | 1 | 1 | 1 | 0 | 0 | 1 |
| 40 | 70 | 2 | 2 | 1 | 1 | 3 | 1 | 1 | 1 |
| 41 | 68 | 2 | 2 | 1 | 2 | 2 | 0 | 0 | 0 |
| 42 | 51 | 2 | 1 | 1 | 2 | 2 | 1 | 0 | 0 |

|    |    |   |   |   |   |   |   |   |   |
|----|----|---|---|---|---|---|---|---|---|
| 43 | 45 | 2 | 2 | 1 | 1 | 2 | 0 | 0 | 1 |
| 44 | 57 | 1 | 1 | 1 | 1 | 1 | 0 | 0 | 0 |
| 45 | 58 | 1 | 2 | 1 | 2 | 2 | 1 | 0 | 1 |
| 46 | 69 | 2 | 2 | 1 | 1 | 2 | 0 | 0 | 0 |
| 47 | 68 | 2 | 2 | 1 | 1 | 1 | 0 | 0 | 0 |
| 48 | 66 | 1 | 2 | 1 | 1 | 1 | 0 | 1 | 0 |
| 49 | 60 | 1 | 2 | 1 | 2 | 2 | 0 | 0 | 0 |
| 50 | 48 | 2 | 2 | 1 | 2 | 4 | 1 | 1 | 0 |
| 51 | 61 | 1 | 3 | 1 | 2 | 1 | 0 | 0 | 0 |
| 52 | 34 | 1 | 2 | 1 | 2 | 2 | 1 | 0 | 1 |
| 53 | 69 | 1 | 2 | 1 | 1 | 2 | 1 | 1 | 0 |
| 54 | 61 | 1 | 2 | 1 | 1 | 3 | 1 | 0 | 0 |
| 55 | 66 | 1 | 2 | 1 | 2 | 2 | 0 | 0 | 0 |
| 56 | 68 | 1 | 2 | 1 | 1 | 2 | 0 | 1 | 1 |
| 57 | 50 | 2 | 2 | 1 | 2 | 3 | 0 | 1 | 1 |
| 58 | 60 | 2 | 2 | 1 | 1 | 1 | 1 | 0 | 1 |
| 59 | 69 | 1 | 1 | 1 | 1 | 1 | 0 | 0 | 0 |
| 60 | 56 | 2 | 2 | 1 | 1 | 2 | 1 | 1 | 1 |
| 61 | 54 | 2 | 3 | 1 | 1 | 2 | 0 | 0 | 0 |
| 62 | 70 | 2 | 3 | 1 | 1 | 2 | 1 | 1 | 0 |
| 63 | 57 | 1 | 2 | 1 | 2 | 1 | 1 | 0 | 0 |
| 64 | 67 | 2 | 2 | 1 | 2 | 1 | 0 | 0 | 0 |
| 65 | 52 | 1 | 2 | 1 | 1 | 1 | 1 | 0 | 1 |
| 66 | 81 | 2 | 1 | 1 | 2 | 3 | 0 | 0 | 0 |
| 67 | 57 | 2 | 2 | 1 | 2 | 2 | 0 | 0 | 0 |

|    |    |   |   |   |   |   |   |   |   |
|----|----|---|---|---|---|---|---|---|---|
| 68 | 63 | 2 | 2 | 1 | 2 | 3 | 1 | 1 | 1 |
| 69 | 54 | 1 | 1 | 1 | 2 | 2 | 0 | 0 | 0 |
| 70 | 79 | 1 | 2 | 1 | 1 | 4 | 1 | 0 | 0 |
| 71 | 57 | 1 | 2 | 1 | 2 | 3 | 1 | 0 | 0 |
| 72 | 50 | 2 | 2 | 1 | 1 | 2 | 1 | 0 | 1 |
| 73 | 54 | 1 | 1 | 1 | 2 | 1 | 1 | 1 | 0 |
| 74 | 51 | 2 | 1 | 1 | 2 | 3 | 0 | 0 | 0 |
| 75 | 52 | 2 | 2 | 1 | 2 | 2 | 0 | 0 | 1 |
| 76 | 53 | 2 | 2 | 1 | 2 | 2 | 0 | 0 | 1 |
| 77 | 69 | 1 | 2 | 1 | 1 | 2 | 1 | 0 | 0 |
| 78 | 51 | 2 | 2 | 1 | 1 | 1 | 0 | 0 | 0 |
| 79 | 74 | 1 | 2 | 1 | 1 | 2 | 0 | 0 | 0 |
| 80 | 63 | 1 | 2 | 1 | 2 | 2 | 0 | 0 | 1 |
| 81 | 52 | 1 | 2 | 1 | 1 | 3 | 1 | 0 | 0 |
| 82 | 53 | 1 | 2 | 2 | 1 | 2 | 0 | 0 | 1 |
| 83 | 64 | 2 | 1 | 1 | 1 | 2 | 0 | 0 | 1 |
| 84 | 64 | 1 | 1 | 1 | 2 | 2 | 0 | 0 | 0 |
| 85 | 36 | 2 | 2 | 1 | 2 | 1 | 0 | 0 | 1 |
| 86 | 43 | 1 | 3 | 1 | 1 | 3 | 0 | 1 | 0 |
| 87 | 47 | 1 | 1 | 1 | 2 | 2 | 1 | 0 | 0 |
| 88 | 62 | 1 | 2 | 1 | 1 | 1 | 1 | 0 | 0 |
| 89 | 60 | 1 | 3 | 1 | 1 | 3 | 0 | 0 | 1 |
| 90 | 49 | 2 | 3 | 1 | 1 | 1 | 1 | 0 | 1 |
| 91 | 56 | 1 | 2 | 1 | 2 | 2 | 0 | 1 | 1 |
| 92 | 43 | 1 | 1 | 1 | 2 | 1 | 0 | 0 | 1 |

|     |    |   |   |   |   |   |   |   |   |
|-----|----|---|---|---|---|---|---|---|---|
| 93  | 72 | 2 | 2 | 1 | 1 | 3 | 0 | 1 | 0 |
| 94  | 71 | 1 | 2 | 1 | 1 | 2 | 1 | 0 | 0 |
| 95  | 57 | 1 | 2 | 1 | 1 | 2 | 1 | 0 | 0 |
| 96  | 67 | 1 | 1 | 1 | 2 | 1 | 1 | 0 | 0 |
| 97  | 62 | 1 | 2 | 1 | 1 | 1 | 0 | 0 | 1 |
| 98  | 66 | 1 | 3 | 1 | 1 | 1 | 1 | 0 | 0 |
| 99  | 56 | 1 | 2 | 1 | 1 | 1 | 1 | 0 | 1 |
| 100 | 54 | 2 | 2 | 2 | 2 | 2 | 1 | 0 | 0 |
| 101 | 62 | 2 | 2 | 2 | 1 | 4 | 1 | 0 | 0 |
| 102 | 56 | 1 | 3 | 2 | 1 | 3 | 0 | 1 | 0 |
| 103 | 56 | 2 | 2 | 2 | 2 | 1 | 1 | 0 | 0 |
| 104 | 55 | 2 | 2 | 1 | 1 | 2 | 1 | 1 | 0 |
| 105 | 48 | 1 | 2 | 1 | 2 | 4 | 1 | 0 | 0 |
| 106 | 40 | 1 | 1 | 1 | 2 | 2 | 0 | 0 | 0 |
| 107 | 65 | 1 | 2 | 1 | 1 | 2 | 1 | 0 | 0 |
| 108 | 40 | 2 | 3 | 1 | 1 | 2 | 1 | 0 | 0 |
| 109 | 66 | 2 | 1 | 1 | 1 | 1 | 1 | 0 | 0 |
| 110 | 53 | 1 | 2 | 1 | 1 | 2 | 1 | 0 | 0 |
| 111 | 55 | 1 | 2 | 1 | 2 | 3 | 1 | 1 | 0 |
| 112 | 28 | 2 | 3 | 2 | 1 | 2 | 0 | 1 | 0 |
| 113 | 53 | 1 | 2 | 1 | 2 | 1 | 0 | 0 | 1 |
| 114 | 52 | 1 | 2 | 1 | 2 | 1 | 1 | 0 | 0 |
| 115 | 38 | 1 | 2 | 1 | 2 | 2 | 1 | 1 | 0 |
| 116 | 36 | 2 | 2 | 1 | 2 | 3 | 1 | 0 | 0 |
| 117 | 50 | 2 | 2 | 1 | 2 | 1 | 1 | 1 | 1 |

|     |    |   |   |   |   |   |   |   |   |
|-----|----|---|---|---|---|---|---|---|---|
| 118 | 53 | 2 | 2 | 1 | 2 | 2 | 1 | 0 | 0 |
| 119 | 57 | 2 | 1 | 1 | 2 | 4 | 1 | 0 | 1 |
| 120 | 80 | 2 | 1 | 1 | 1 | 2 | 0 | 0 | 1 |
| 121 | 53 | 2 | 3 | 1 | 1 | 2 | 1 | 1 | 0 |
| 122 | 65 | 2 | 2 | 1 | 2 | 2 | 1 | 1 | 1 |
| 123 | 56 | 2 | 1 | 1 | 1 | 1 | 1 | 1 | 0 |
| 124 | 48 | 2 | 2 | 1 | 1 | 4 | 0 | 0 | 0 |
| 125 | 59 | 2 | 1 | 2 | 1 | 3 | 0 | 1 | 0 |
| 126 | 61 | 1 | 2 | 1 | 2 | 3 | 1 | 0 | 0 |
| 127 | 65 | 1 | 3 | 1 | 1 | 2 | 1 | 0 | 0 |
| 128 | 61 | 2 | 2 | 1 | 1 | 1 | 0 | 0 | 1 |
| 129 | 41 | 2 | 2 | 1 | 2 | 2 | 0 | 0 | 0 |
| 130 | 48 | 2 | 1 | 1 | 2 | 3 | 0 | 0 | 0 |
| 131 | 79 | 1 | 3 | 1 | 1 | 4 | 0 | 0 | 0 |
| 132 | 71 | 1 | 2 | 1 | 1 | 1 | 0 | 0 | 0 |
| 133 | 56 | 1 | 1 | 1 | 2 | 2 | 0 | 0 | 1 |
| 134 | 45 | 2 | 1 | 1 | 2 | 3 | 1 | 0 | 0 |
| 135 | 68 | 2 | 2 | 1 | 1 | 4 | 0 | 0 | 0 |
| 136 | 45 | 1 | 1 | 1 | 1 | 1 | 0 | 0 | 1 |
| 137 | 68 | 2 | 1 | 1 | 2 | 2 | 0 | 0 | 0 |
| 138 | 72 | 1 | 2 | 1 | 1 | 3 | 0 | 0 | 0 |
| 139 | 51 | 1 | 2 | 1 | 1 | 1 | 1 | 0 | 0 |
| 140 | 75 | 1 | 2 | 1 | 2 | 3 | 1 | 0 | 1 |
| 141 | 47 | 2 | 2 | 1 | 2 | 1 | 0 | 0 | 0 |
| 142 | 60 | 2 | 1 | 1 | 1 | 2 | 0 | 0 | 0 |

|     |    |   |   |   |   |   |   |   |   |
|-----|----|---|---|---|---|---|---|---|---|
| 143 | 45 | 1 | 3 | 1 | 1 | 1 | 0 | 0 | 1 |
| 144 | 31 | 1 | 2 | 1 | 2 | 1 | 0 | 0 | 0 |
| 145 | 26 | 2 | 3 | 2 | 2 | 1 | 1 | 0 | 0 |
| 146 | 66 | 2 | 1 | 1 | 1 | 1 | 0 | 0 | 1 |
| 147 | 52 | 1 | 1 | 1 | 2 | 1 | 0 | 1 | 0 |
| 148 | 54 | 1 | 2 | 1 | 1 | 2 | 0 | 1 | 0 |
| 149 | 59 | 1 | 3 | 1 | 1 | 2 | 0 | 0 | 0 |
| 150 | 37 | 2 | 2 | 1 | 2 | 1 | 0 | 0 | 0 |
| 151 | 61 | 1 | 2 | 1 | 2 | 3 | 0 | 0 | 0 |
| 152 | 77 | 1 | 2 | 1 | 2 | 2 | 0 | 0 | 0 |
| 153 | 42 | 1 | 3 | 1 | 1 | 2 | 1 | 0 | 0 |
| 154 | 69 | 1 | 1 | 1 | 1 | 2 | 0 | 0 | 0 |
| 155 | 54 | 1 | 3 | 2 | 1 | 3 | 1 | 0 | 0 |
| 156 | 48 | 2 | 2 | 1 | 1 | 2 | 0 | 0 | 1 |
| 157 | 63 | 1 | 2 | 1 | 2 | 2 | 0 | 0 | 0 |
| 158 | 46 | 2 | 2 | 1 | 1 | 1 | 0 | 0 | 0 |
| 159 | 69 | 1 | 1 | 1 | 2 | 2 | 1 | 1 | 0 |
| 160 | 42 | 1 | 3 | 1 | 1 | 1 | 0 | 0 | 1 |
| 161 | 63 | 1 | 1 | 1 | 1 | 2 | 0 | 0 | 0 |
| 162 | 49 | 1 | 2 | 1 | 2 | 1 | 1 | 0 | 1 |
| 163 | 49 | 2 | 2 | 1 | 1 | 2 | 0 | 0 | 0 |
| 164 | 44 | 1 | 2 | 1 | 1 | 1 | 0 | 0 | 1 |
| 165 | 50 | 1 | 2 | 1 | 1 | 3 | 1 | 0 | 0 |
| 166 | 32 | 1 | 2 | 1 | 1 | 2 | 0 | 0 | 0 |
| 167 | 33 | 1 | 3 | 1 | 1 | 2 | 0 | 0 | 0 |

|     |    |   |   |   |   |   |   |   |   |
|-----|----|---|---|---|---|---|---|---|---|
| 168 | 73 | 1 | 2 | 1 | 1 | 3 | 1 | 0 | 0 |
| 169 | 78 | 1 | 1 | 1 | 1 | 2 | 1 | 0 | 0 |
| 170 | 65 | 1 | 1 | 1 | 1 | 2 | 0 | 0 | 0 |
| 171 | 33 | 1 | 3 | 1 | 2 | 1 | 0 | 1 | 1 |
| 172 | 34 | 1 | 1 | 1 | 1 | 1 | 0 | 0 | 0 |
| 173 | 69 | 1 | 2 | 1 | 2 | 3 | 1 | 0 | 0 |
| 174 | 29 | 2 | 3 | 1 | 2 | 1 | 0 | 0 | 0 |
| 175 | 51 | 2 | 2 | 1 | 1 | 2 | 1 | 1 | 1 |
| 176 | 62 | 1 | 2 | 1 | 2 | 2 | 0 | 0 | 0 |
| 177 | 47 | 1 | 2 | 1 | 1 | 3 | 0 | 0 | 0 |
| 178 | 54 | 2 | 2 | 1 | 1 | 2 | 1 | 1 | 0 |
| 179 | 56 | 2 | 1 | 1 | 2 | 2 | 1 | 0 | 0 |
| 180 | 47 | 1 | 1 | 1 | 1 | 2 | 0 | 0 | 0 |
| 181 | 51 | 1 | 2 | 1 | 2 | 3 | 1 | 0 | 1 |
| 182 | 42 | 2 | 2 | 1 | 2 | 1 | 0 | 0 | 0 |
| 183 | 72 | 2 | 1 | 1 | 1 | 2 | 1 | 0 | 0 |
| 184 | 55 | 2 | 2 | 1 | 2 | 2 | 0 | 0 | 0 |
| 185 | 65 | 2 | 2 | 1 | 1 | 2 | 0 | 0 | 0 |
| 186 | 26 | 2 | 3 | 1 | 1 | 1 | 0 | 0 | 0 |
| 187 | 80 | 2 | 1 | 1 | 2 | 1 | 0 | 0 | 0 |
| 188 | 60 | 2 | 1 | 1 | 1 | 3 | 0 | 0 | 1 |
| 189 | 72 | 2 | 2 | 1 | 1 | 2 | 0 | 0 | 0 |
| 190 | 51 | 1 | 2 | 1 | 2 | 4 | 1 | 0 | 0 |
| 191 | 59 | 1 | 3 | 1 | 2 | 3 | 1 | 0 | 0 |
| 192 | 49 | 1 | 1 | 1 | 1 | 2 | 1 | 0 | 0 |



|     |    |   |   |   |   |   |   |   |   |
|-----|----|---|---|---|---|---|---|---|---|
| 193 | 49 | 2 | 1 | 1 | 2 | 3 | 0 | 0 | 1 |
| 194 | 60 | 2 | 2 | 1 | 1 | 2 | 1 | 0 | 1 |
| 195 | 45 | 2 | 2 | 1 | 1 | 3 | 1 | 0 | 0 |
| 196 | 62 | 1 | 2 | 1 | 1 | 2 | 1 | 0 | 0 |
| 197 | 66 | 1 | 1 | 1 | 2 | 2 | 1 | 0 | 0 |
| 198 | 57 | 1 | 2 | 1 | 1 | 2 | 0 | 0 | 0 |
| 199 | 67 | 2 | 2 | 1 | 1 | 2 | 0 | 0 | 0 |
| 200 | 75 | 1 | 2 | 1 | 1 | 2 | 1 | 0 | 0 |
| 201 | 65 | 2 | 1 | 1 | 1 | 1 | 0 | 0 | 0 |
| 202 | 48 | 1 | 2 | 1 | 2 | 3 | 1 | 0 | 1 |
| 203 | 60 | 1 | 2 | 1 | 2 | 2 | 0 | 0 | 0 |
| 204 | 53 | 1 | 2 | 1 | 2 | 2 | 1 | 0 | 1 |
| 205 | 69 | 2 | 1 | 1 | 2 | 2 | 0 | 0 | 0 |
| 206 | 84 | 2 | 1 | 1 | 2 | 2 | 0 | 0 | 0 |
| 207 | 53 | 2 | 3 | 1 | 1 | 2 | 0 | 0 | 0 |
| 208 | 52 | 1 | 1 | 1 | 2 | 2 | 0 | 0 | 0 |
| 209 | 70 | 2 | 2 | 1 | 1 | 3 | 0 | 0 | 0 |
| 210 | 72 | 1 | 1 | 1 | 2 | 1 | 0 | 0 | 0 |
| 211 | 54 | 2 | 2 | 1 | 1 | 1 | 1 | 1 | 1 |
| 212 | 50 | 1 | 2 | 1 | 1 | 2 | 1 | 0 | 0 |
| 213 | 45 | 1 | 3 | 1 | 1 | 2 | 0 | 0 | 0 |
| 214 | 69 | 2 | 2 | 1 | 1 | 2 | 0 | 0 | 0 |
| 215 | 65 | 2 | 1 | 1 | 1 | 3 | 0 | 0 | 0 |
| 216 | 72 | 1 | 3 | 1 | 1 | 3 | 1 | 0 | 0 |
| 217 | 55 | 1 | 2 | 1 | 1 | 3 | 0 | 0 | 0 |

|     |    |   |   |   |   |   |   |   |   |
|-----|----|---|---|---|---|---|---|---|---|
| 218 | 69 | 1 | 1 | 1 | 2 | 4 | 1 | 0 | 0 |
| 219 | 65 | 2 | 1 | 1 | 1 | 2 | 1 | 0 | 0 |
| 220 | 51 | 1 | 1 | 1 | 1 | 1 | 0 | 0 | 0 |
| 221 | 54 | 1 | 1 | 1 | 1 | 1 | 1 | 0 | 0 |
| 222 | 73 | 1 | 2 | 1 | 1 | 2 | 1 | 0 | 1 |
| 223 | 61 | 1 | 2 | 1 | 1 | 2 | 0 | 0 | 0 |
| 224 | 43 | 1 | 3 | 1 | 2 | 2 | 1 | 1 | 0 |
| 225 | 67 | 2 | 1 | 1 | 2 | 4 | 0 | 0 | 1 |
| 226 | 64 | 1 | 2 | 1 | 1 | 1 | 0 | 0 | 0 |
| 227 | 54 | 2 | 2 | 1 | 2 | 2 | 0 | 0 | 0 |
| 228 | 69 | 1 | 1 | 1 | 2 | 1 | 1 | 0 | 0 |
| 229 | 66 | 1 | 2 | 1 | 2 | 1 | 0 | 0 | 0 |
| 230 | 62 | 1 | 1 | 1 | 2 | 1 | 0 | 0 | 1 |
| 231 | 49 | 2 | 1 | 1 | 2 | 3 | 1 | 0 | 0 |
| 232 | 66 | 1 | 1 | 1 | 2 | 2 | 1 | 0 | 0 |
| 233 | 52 | 1 | 2 | 1 | 2 | 2 | 0 | 0 | 0 |
| 234 | 50 | 2 | 1 | 1 | 2 | 2 | 0 | 1 | 1 |
| 235 | 66 | 2 | 1 | 1 | 2 | 4 | 1 | 0 | 0 |
| 236 | 62 | 1 | 3 | 1 | 1 | 2 | 1 | 0 | 0 |
| 237 | 66 | 1 | 2 | 1 | 1 | 2 | 0 | 1 | 0 |
| 238 | 58 | 2 | 1 | 1 | 2 | 2 | 1 | 0 | 0 |
| 239 | 48 | 1 | 2 | 1 | 1 | 1 | 1 | 0 | 0 |
| 240 | 70 | 2 | 3 | 1 | 1 | 3 | 0 | 0 | 0 |
| 241 | 55 | 2 | 1 | 1 | 2 | 2 | 1 | 0 | 0 |
| 242 | 50 | 2 | 2 | 1 | 1 | 2 | 0 | 0 | 1 |

|     |    |   |   |   |   |   |   |   |   |
|-----|----|---|---|---|---|---|---|---|---|
| 243 | 39 | 1 | 2 | 1 | 2 | 2 | 0 | 0 | 0 |
| 244 | 49 | 1 | 1 | 1 | 1 | 1 | 0 | 0 | 0 |
| 245 | 51 | 1 | 2 | 1 | 2 | 2 | 0 | 0 | 0 |
| 246 | 64 | 1 | 3 | 1 | 1 | 2 | 0 | 0 | 0 |
| 247 | 35 | 1 | 3 | 1 | 2 | 2 | 0 | 0 | 0 |
| 248 | 72 | 2 | 1 | 2 | 1 | 3 | 0 | 0 | 0 |
| 249 | 47 | 1 | 1 | 1 | 2 | 1 | 0 | 0 | 0 |
| 250 | 43 | 2 | 1 | 1 | 2 | 2 | 0 | 1 | 0 |
| 251 | 50 | 1 | 1 | 1 | 2 | 2 | 1 | 0 | 0 |
| 252 | 39 | 1 | 2 | 1 | 2 | 2 | 1 | 0 | 0 |
| 253 | 69 | 2 | 1 | 1 | 2 | 2 | 0 | 1 | 1 |
| 254 | 70 | 2 | 1 | 1 | 2 | 3 | 1 | 0 | 1 |
| 255 | 55 | 1 | 2 | 1 | 1 | 2 | 0 | 0 | 0 |
| 256 | 56 | 2 | 2 | 1 | 1 | 3 | 1 | 0 | 1 |
| 257 | 60 | 2 | 1 | 1 | 2 | 2 | 0 | 0 | 0 |
| 258 | 47 | 2 | 1 | 1 | 2 | 1 | 0 | 0 | 0 |
| 259 | 69 | 1 | 1 | 1 | 2 | 2 | 0 | 0 | 1 |
| 260 | 32 | 1 | 3 | 1 | 1 | 1 | 0 | 1 | 0 |
| 261 | 71 | 1 | 2 | 1 | 1 | 1 | 0 | 0 | 0 |
| 262 | 57 | 2 | 3 | 2 | 1 | 2 | 0 | 0 | 0 |
| 263 | 70 | 2 | 1 | 1 | 1 | 1 | 0 | 0 | 0 |
| 264 | 51 | 2 | 2 | 1 | 2 | 1 | 1 | 0 | 1 |
| 265 | 72 | 1 | 2 | 1 | 1 | 4 | 0 | 0 | 0 |
| 266 | 54 | 1 | 2 | 1 | 2 | 2 | 0 | 1 | 1 |
| 267 | 62 | 1 | 1 | 1 | 2 | 2 | 0 | 0 | 0 |

|     |    |   |   |   |   |   |   |   |   |
|-----|----|---|---|---|---|---|---|---|---|
| 268 | 51 | 1 | 2 | 1 | 2 | 2 | 0 | 0 | 0 |
| 269 | 53 | 1 | 2 | 1 | 1 | 1 | 0 | 0 | 0 |
| 270 | 64 | 1 | 2 | 1 | 1 | 2 | 0 | 0 | 0 |
| 271 | 52 | 1 | 2 | 1 | 1 | 3 | 1 | 0 | 0 |
| 272 | 66 | 2 | 1 | 1 | 2 | 4 | 1 | 0 | 1 |
| 273 | 46 | 1 | 1 | 1 | 2 | 4 | 0 | 0 | 0 |
| 274 | 77 | 2 | 2 | 1 | 1 | 3 | 1 | 0 | 0 |
| 275 | 50 | 1 | 1 | 1 | 2 | 4 | 0 | 0 | 0 |
| 276 | 45 | 1 | 1 | 1 | 2 | 3 | 0 | 1 | 1 |
| 277 | 56 | 2 | 1 | 1 | 2 | 2 | 0 | 0 | 0 |
| 278 | 66 | 1 | 2 | 1 | 1 | 2 | 1 | 0 | 0 |
| 279 | 51 | 1 | 3 | 2 | 1 | 4 | 0 | 0 | 0 |
| 280 | 62 | 1 | 2 | 1 | 1 | 2 | 0 | 0 | 0 |
| 281 | 60 | 1 | 2 | 1 | 1 | 2 | 0 | 0 | 0 |
| 282 | 61 | 1 | 1 | 1 | 1 | 1 | 0 | 0 | 0 |
| 283 | 83 | 2 | 1 | 2 | 1 | 3 | 0 | 0 | 0 |
| 284 | 65 | 1 | 1 | 1 | 1 | 2 | 0 | 0 | 0 |
| 285 | 72 | 1 | 1 | 1 | 2 | 2 | 1 | 0 | 0 |
| 286 | 16 | 1 | 2 | 1 | 2 | 4 | 0 | 0 | 0 |
| 287 | 66 | 1 | 2 | 1 | 1 | 1 | 1 | 0 | 0 |
| 288 | 66 | 1 | 2 | 1 | 1 | 1 | 1 | 0 | 0 |
| 289 | 67 | 2 | 1 | 1 | 2 | 2 | 1 | 0 | 1 |
| 290 | 61 | 1 | 2 | 1 | 2 | 2 | 1 | 0 | 0 |
| 291 | 42 | 1 | 3 | 1 | 1 | 2 | 1 | 0 | 0 |
| 292 | 39 | 1 | 3 | 1 | 1 | 2 | 1 | 1 | 0 |

|     |    |   |   |   |   |   |   |   |   |
|-----|----|---|---|---|---|---|---|---|---|
| 293 | 59 | 2 | 1 | 1 | 2 | 3 | 1 | 0 | 0 |
| 294 | 44 | 2 | 2 | 1 | 1 | 2 | 1 | 0 | 0 |
| 295 | 81 | 2 | 2 | 1 | 1 | 1 | 0 | 0 | 0 |
| 296 | 63 | 1 | 1 | 1 | 1 | 1 | 1 | 0 | 1 |
| 297 | 55 | 1 | 2 | 1 | 1 | 3 | 1 | 1 | 0 |
| 298 | 46 | 1 | 2 | 1 | 2 | 2 | 1 | 0 | 1 |
| 299 | 31 | 1 | 3 | 1 | 2 | 3 | 1 | 1 | 0 |
| 300 | 42 | 2 | 1 | 1 | 2 | 3 | 0 | 0 | 0 |
| 301 | 67 | 2 | 1 | 1 | 1 | 1 | 0 | 0 | 0 |
| 302 | 56 | 1 | 2 | 1 | 1 | 1 | 1 | 1 | 0 |
| 303 | 68 | 1 | 2 | 1 | 2 | 1 | 0 | 0 | 0 |
| 304 | 41 | 1 | 2 | 1 | 2 | 4 | 0 | 1 | 0 |
| 305 | 82 | 1 | 2 | 1 | 1 | 3 | 0 | 0 | 0 |
| 306 | 54 | 1 | 2 | 1 | 1 | 1 | 0 | 0 | 0 |
| 307 | 65 | 2 | 2 | 1 | 1 | 1 | 0 | 0 | 0 |
| 308 | 68 | 1 | 2 | 1 | 2 | 2 | 0 | 0 | 0 |
| 309 | 47 | 2 | 3 | 1 | 1 | 2 | 0 | 0 | 0 |
| 310 | 55 | 2 | 2 | 1 | 2 | 2 | 0 | 0 | 0 |
| 311 | 55 | 1 | 1 | 1 | 2 | 2 | 0 | 0 | 0 |
| 312 | 63 | 2 | 1 | 1 | 2 | 3 | 1 | 1 | 1 |
| 313 | 72 | 2 | 3 | 1 | 1 | 4 | 1 | 1 | 0 |
| 314 | 26 | 2 | 2 | 1 | 1 | 1 | 0 | 0 | 0 |
| 315 | 52 | 1 | 2 | 1 | 2 | 2 | 1 | 0 | 1 |
| 316 | 42 | 2 | 2 | 1 | 2 | 2 | 0 | 1 | 1 |
| 317 | 70 | 1 | 2 | 1 | 2 | 3 | 1 | 0 | 0 |

|     |    |   |   |   |   |   |   |   |   |
|-----|----|---|---|---|---|---|---|---|---|
| 318 | 50 | 2 | 2 | 1 | 2 | 2 | 1 | 1 | 1 |
| 319 | 57 | 1 | 2 | 1 | 2 | 2 | 0 | 0 | 0 |
| 320 | 41 | 1 | 3 | 1 | 1 | 2 | 0 | 0 | 0 |
| 321 | 62 | 2 | 2 | 1 | 1 | 2 | 0 | 0 | 0 |
| 322 | 60 | 2 | 2 | 1 | 1 | 1 | 0 | 0 | 0 |
| 323 | 56 | 2 | 1 | 1 | 2 | 4 | 0 | 0 | 0 |
| 324 | 53 | 1 | 2 | 1 | 2 | 2 | 1 | 0 | 1 |
| 325 | 66 | 1 | 1 | 1 | 2 | 2 | 0 | 0 | 0 |
| 326 | 73 | 1 | 2 | 1 | 1 | 1 | 1 | 0 | 0 |
| 327 | 53 | 1 | 2 | 1 | 1 | 2 | 0 | 0 | 0 |
| 328 | 33 | 1 | 2 | 1 | 1 | 2 | 1 | 0 | 0 |
| 329 | 55 | 1 | 2 | 1 | 1 | 1 | 0 | 0 | 0 |
| 330 | 73 | 1 | 1 | 1 | 2 | 1 | 0 | 0 | 0 |
| 331 | 61 | 1 | 2 | 1 | 2 | 1 | 1 | 1 | 0 |
| 332 | 58 | 1 | 2 | 1 | 2 | 2 | 0 | 0 | 0 |
| 333 | 55 | 1 | 2 | 1 | 2 | 2 | 0 | 0 | 0 |
| 334 | 74 | 1 | 1 | 1 | 2 | 3 | 0 | 0 | 0 |
| 335 | 70 | 1 | 2 | 1 | 2 | 4 | 0 | 0 | 0 |
| 336 | 50 | 1 | 2 | 1 | 2 | 3 | 0 | 0 | 0 |
| 337 | 47 | 1 | 2 | 1 | 1 | 2 | 0 | 0 | 0 |
| 338 | 68 | 1 | 1 | 1 | 1 | 3 | 0 | 0 | 0 |
| 339 | 62 | 1 | 2 | 1 | 2 | 3 | 0 | 0 | 0 |
| 340 | 26 | 2 | 2 | 1 | 2 | 1 | 0 | 1 | 0 |
| 341 | 33 | 2 | 2 | 1 | 2 | 2 | 0 | 0 | 0 |
| 342 | 60 | 1 | 2 | 1 | 2 | 3 | 0 | 0 | 0 |

|     |    |   |   |   |   |   |   |   |   |
|-----|----|---|---|---|---|---|---|---|---|
| 343 | 66 | 1 | 1 | 1 | 2 | 2 | 0 | 0 | 0 |
| 344 | 40 | 1 | 2 | 1 | 1 | 2 | 1 | 0 | 0 |
| 345 | 44 | 2 | 3 | 1 | 1 | 1 | 0 | 0 | 0 |
| 346 | 59 | 1 | 2 | 1 | 1 | 3 | 0 | 0 | 0 |
| 347 | 62 | 1 | 2 | 1 | 1 | 1 | 0 | 0 | 0 |
| 348 | 55 | 1 | 2 | 1 | 2 | 2 | 0 | 0 | 0 |
| 349 | 31 | 1 | 2 | 2 | 1 | 2 | 0 | 0 | 0 |
| 350 | 33 | 2 | 2 | 1 | 2 | 2 | 0 | 0 | 0 |
| 351 | 68 | 1 | 3 | 1 | 1 | 1 | 1 | 1 | 0 |
| 352 | 50 | 2 | 2 | 1 | 1 | 2 | 0 | 0 | 0 |
| 353 | 37 | 2 | 2 | 1 | 2 | 2 | 0 | 0 | 0 |
| 354 | 68 | 2 | 1 | 2 | 2 | 1 | 0 | 1 | 0 |
| 355 | 72 | 2 | 1 | 1 | 2 | 2 | 0 | 0 | 0 |
| 356 | 45 | 1 | 2 | 1 | 1 | 2 | 0 | 0 | 0 |
| 357 | 50 | 2 | 1 | 1 | 2 | 3 | 0 | 0 | 0 |
| 358 | 82 | 2 | 1 | 2 | 1 | 1 | 0 | 0 | 0 |
| 359 | 63 | 2 | 1 | 1 | 2 | 2 | 0 | 0 | 0 |
| 360 | 42 | 2 | 2 | 1 | 2 | 3 | 0 | 0 | 0 |
| 361 | 62 | 2 | 1 | 1 | 2 | 1 | 0 | 0 | 0 |
| 362 | 58 | 2 | 2 | 1 | 1 | 2 | 0 | 0 | 0 |
| 363 | 49 | 1 | 2 | 1 | 2 | 2 | 0 | 0 | 0 |
| 364 | 70 | 1 | 2 | 1 | 2 | 2 | 0 | 0 | 0 |
| 365 | 71 | 2 | 1 | 1 | 2 | 2 | 0 | 0 | 0 |
| 366 | 67 | 1 | 1 | 1 | 2 | 2 | 0 | 0 | 0 |
| 367 | 51 | 2 | 2 | 1 | 2 | 3 | 0 | 0 | 0 |

|     |    |   |   |   |   |   |   |   |   |
|-----|----|---|---|---|---|---|---|---|---|
| 368 | 68 | 2 | 1 | 1 | 2 | 3 | 0 | 0 | 0 |
| 369 | 50 | 2 | 2 | 1 | 2 | 2 | 1 | 0 | 0 |
| 370 | 55 | 1 | 2 | 1 | 1 | 1 | 1 | 0 | 0 |
| 371 | 45 | 1 | 1 | 2 | 2 | 3 | 0 | 0 | 0 |
| 372 | 55 | 2 | 1 | 1 | 1 | 1 | 0 | 0 | 0 |
| 373 | 38 | 1 | 2 | 1 | 2 | 2 | 0 | 0 | 0 |
| 374 | 64 | 2 | 1 | 1 | 1 | 4 | 0 | 0 | 0 |
| 375 | 54 | 1 | 2 | 1 | 2 | 1 | 1 | 0 | 0 |
| 376 | 49 | 1 | 2 | 1 | 2 | 4 | 0 | 0 | 0 |
| 377 | 65 | 2 | 2 | 1 | 1 | 1 | 1 | 1 | 0 |
| 378 | 61 | 1 | 1 | 1 | 2 | 2 | 0 | 0 | 0 |
| 379 | 37 | 1 | 2 | 1 | 2 | 2 | 0 | 0 | 0 |
| 380 | 45 | 1 | 3 | 1 | 2 | 3 | 0 | 0 | 0 |
| 381 | 45 | 2 | 1 | 1 | 1 | 3 | 0 | 0 | 1 |
| 382 | 57 | 1 | 2 | 1 | 1 | 2 | 1 | 0 | 0 |
| 383 | 53 | 1 | 1 | 1 | 2 | 3 | 1 | 0 | 1 |
| 384 | 66 | 1 | 3 | 1 | 1 | 2 | 1 | 0 | 0 |
| 385 | 68 | 2 | 1 | 1 | 2 | 2 | 1 | 0 | 0 |
| 386 | 50 | 1 | 2 | 1 | 2 | 2 | 0 | 0 | 0 |
| 387 | 54 | 2 | 2 | 1 | 2 | 2 | 0 | 0 | 0 |
| 388 | 62 | 1 | 2 | 1 | 2 | 2 | 0 | 0 | 0 |
| 389 | 62 | 1 | 1 | 1 | 2 | 1 | 0 | 0 | 0 |
| 390 | 61 | 2 | 2 | 1 | 1 | 2 | 1 | 0 | 0 |
| 391 | 71 | 1 | 1 | 1 | 2 | 1 | 0 | 0 | 0 |
| 392 | 71 | 1 | 1 | 1 | 2 | 4 | 0 | 0 | 0 |



|     |    |   |   |   |   |   |   |   |   |
|-----|----|---|---|---|---|---|---|---|---|
| 393 | 53 | 1 | 2 | 1 | 1 | 1 | 0 | 0 | 0 |
| 394 | 48 | 1 | 1 | 1 | 2 | 1 | 0 | 0 | 0 |
| 395 | 72 | 1 | 2 | 1 | 1 | 2 | 1 | 0 | 0 |
| 396 | 48 | 1 | 2 | 1 | 2 | 3 | 0 | 1 | 0 |
| 397 | 55 | 1 | 3 | 1 | 1 | 2 | 0 | 0 | 0 |
| 398 | 55 | 2 | 1 | 1 | 1 | 1 | 1 | 0 | 0 |
| 399 | 65 | 1 | 1 | 1 | 2 | 2 | 0 | 0 | 0 |
| 400 | 71 | 1 | 3 | 1 | 2 | 2 | 1 | 0 | 0 |
| 401 | 45 | 1 | 2 | 1 | 2 | 2 | 0 | 0 | 0 |
| 402 | 54 | 2 | 2 | 1 | 2 | 3 | 1 | 0 | 0 |
| 403 | 45 | 1 | 2 | 1 | 2 | 2 | 0 | 0 | 0 |
| 404 | 54 | 1 | 2 | 1 | 1 | 2 | 0 | 0 | 0 |
| 405 | 76 | 1 | 1 | 1 | 1 | 1 | 0 | 0 | 0 |
| 406 | 71 | 1 | 2 | 1 | 1 | 2 | 0 | 0 | 0 |
| 407 | 57 | 1 | 2 | 1 | 1 | 2 | 0 | 0 | 0 |
| 408 | 62 | 2 | 1 | 1 | 1 | 2 | 0 | 0 | 0 |
| 409 | 53 | 2 | 1 | 1 | 2 | 2 | 0 | 0 | 0 |
| 410 | 67 | 2 | 2 | 1 | 1 | 2 | 0 | 0 | 0 |
| 411 | 65 | 1 | 1 | 1 | 1 | 2 | 0 | 0 | 0 |
| 412 | 61 | 2 | 1 | 1 | 1 | 2 | 0 | 0 | 0 |
| 413 | 64 | 1 | 3 | 1 | 1 | 2 | 0 | 0 | 0 |
| 414 | 57 | 2 | 1 | 1 | 2 | 3 | 0 | 0 | 0 |
| 415 | 42 | 1 | 2 | 1 | 1 | 3 | 0 | 0 | 0 |
| 416 | 61 | 1 | 2 | 1 | 1 | 2 | 0 | 0 | 0 |
| 417 | 55 | 1 | 2 | 1 | 2 | 2 | 0 | 0 | 0 |

|     |    |   |   |   |   |   |   |   |   |
|-----|----|---|---|---|---|---|---|---|---|
| 418 | 41 | 1 | 1 | 1 | 2 | 2 | 0 | 0 | 0 |
| 419 | 67 | 1 | 1 | 1 | 2 | 2 | 0 | 0 | 0 |
| 420 | 55 | 2 | 1 | 1 | 2 | 2 | 1 | 0 | 1 |
| 421 | 60 | 1 | 2 | 1 | 1 | 2 | 0 | 0 | 0 |
| 422 | 79 | 1 | 1 | 1 | 1 | 1 | 1 | 0 | 0 |
| 423 | 49 | 2 | 1 | 2 | 1 | 2 | 0 | 0 | 0 |
| 424 | 73 | 1 | 1 | 1 | 2 | 2 | 0 | 0 | 0 |
| 425 | 65 | 2 | 2 | 1 | 1 | 1 | 0 | 0 | 0 |
| 426 | 65 | 1 | 1 | 1 | 1 | 2 | 0 | 0 | 0 |
| 427 | 61 | 2 | 1 | 1 | 2 | 2 | 0 | 0 | 0 |
| 428 | 57 | 1 | 2 | 1 | 1 | 2 | 0 | 0 | 0 |
| 429 | 48 | 2 | 1 | 1 | 1 | 2 | 0 | 0 | 0 |
| 430 | 70 | 1 | 2 | 1 | 1 | 2 | 0 | 0 | 0 |
| 431 | 44 | 2 | 1 | 1 | 2 | 2 | 0 | 0 | 0 |
| 432 | 58 | 2 | 2 | 1 | 1 | 2 | 0 | 0 | 0 |
| 433 | 43 | 1 | 1 | 1 | 2 | 2 | 0 | 0 | 1 |
| 434 | 69 | 1 | 3 | 1 | 1 | 1 | 0 | 0 | 0 |
| 435 | 44 | 1 | 2 | 1 | 2 | 2 | 0 | 0 | 0 |
| 436 | 53 | 1 | 2 | 2 | 1 | 3 | 0 | 0 | 0 |
| 437 | 63 | 1 | 1 | 1 | 2 | 2 | 0 | 0 | 0 |
| 438 | 63 | 2 | 1 | 1 | 2 | 2 | 0 | 0 | 0 |
| 439 | 69 | 1 | 2 | 1 | 2 | 4 | 0 | 0 | 0 |
| 440 | 55 | 2 | 2 | 1 | 2 | 2 | 0 | 0 | 0 |
| 441 | 64 | 1 | 1 | 1 | 2 | 2 | 0 | 0 | 0 |
| 442 | 59 | 2 | 1 | 1 | 2 | 2 | 0 | 0 | 0 |

|     |    |   |   |   |   |   |   |   |   |
|-----|----|---|---|---|---|---|---|---|---|
| 443 | 51 | 2 | 1 | 1 | 2 | 2 | 0 | 0 | 0 |
| 444 | 62 | 1 | 2 | 1 | 2 | 1 | 1 | 0 | 1 |
| 445 | 64 | 2 | 2 | 1 | 2 | 2 | 0 | 0 | 0 |
| 446 | 30 | 1 | 2 | 1 | 2 | 2 | 0 | 0 | 0 |
| 447 | 75 | 1 | 1 | 1 | 2 | 3 | 0 | 0 | 0 |
| 448 | 48 | 2 | 2 | 1 | 2 | 3 | 0 | 0 | 0 |
| 449 | 45 | 2 | 2 | 1 | 2 | 3 | 1 | 0 | 0 |
| 450 | 76 | 2 | 2 | 1 | 1 | 1 | 0 | 0 | 0 |
| 451 | 63 | 2 | 1 | 1 | 1 | 2 | 0 | 0 | 0 |
| 452 | 63 | 2 | 1 | 1 | 2 | 1 | 0 | 0 | 0 |
| 453 | 45 | 2 | 2 | 1 | 2 | 2 | 0 | 0 | 0 |
| 454 | 60 | 2 | 2 | 1 | 2 | 2 | 0 | 0 | 0 |
| 455 | 59 | 1 | 2 | 1 | 1 | 2 | 1 | 1 | 0 |
| 456 | 37 | 2 | 1 | 1 | 1 | 2 | 0 | 0 | 0 |
| 457 | 63 | 2 | 1 | 1 | 2 | 3 | 0 | 0 | 0 |
| 458 | 63 | 2 | 1 | 2 | 2 | 2 | 0 | 0 | 0 |
| 459 | 56 | 1 | 2 | 1 | 2 | 3 | 1 | 0 | 0 |
| 460 | 46 | 2 | 2 | 1 | 1 | 2 | 1 | 0 | 0 |
| 461 | 63 | 1 | 2 | 1 | 1 | 1 | 0 | 0 | 0 |
| 462 | 45 | 1 | 1 | 1 | 1 | 2 | 0 | 0 | 0 |
| 463 | 67 | 2 | 2 | 1 | 1 | 4 | 1 | 0 | 1 |
| 464 | 40 | 2 | 3 | 1 | 1 | 1 | 0 | 0 | 0 |
| 465 | 62 | 2 | 1 | 1 | 2 | 2 | 0 | 0 | 0 |
| 466 | 30 | 2 | 2 | 1 | 2 | 1 | 0 | 0 | 0 |
| 467 | 57 | 1 | 1 | 2 | 1 | 3 | 0 | 0 | 0 |

|     |    |   |   |   |   |   |   |   |   |
|-----|----|---|---|---|---|---|---|---|---|
| 468 | 58 | 2 | 2 | 1 | 1 | 4 | 0 | 0 | 0 |
| 469 | 36 | 1 | 2 | 1 | 2 | 1 | 1 | 1 | 1 |
| 470 | 52 | 2 | 2 | 1 | 2 | 1 | 0 | 0 | 0 |
| 471 | 54 | 1 | 2 | 1 | 1 | 2 | 1 | 0 | 1 |
| 472 | 60 | 1 | 2 | 1 | 2 | 2 | 0 | 0 | 0 |
| 473 | 61 | 1 | 2 | 1 | 2 | 2 | 0 | 0 | 1 |
| 474 | 72 | 1 | 2 | 1 | 2 | 1 | 0 | 0 | 0 |
| 475 | 71 | 1 | 2 | 1 | 1 | 1 | 0 | 0 | 0 |
| 476 | 56 | 2 | 1 | 1 | 1 | 2 | 0 | 0 | 0 |
| 477 | 66 | 2 | 1 | 1 | 2 | 3 | 0 | 0 | 1 |
| 478 | 69 | 2 | 2 | 1 | 2 | 3 | 0 | 0 | 0 |
| 479 | 50 | 2 | 2 | 1 | 2 | 1 | 1 | 0 | 0 |
| 480 | 63 | 1 | 2 | 1 | 2 | 2 | 1 | 1 | 0 |
| 481 | 55 | 1 | 2 | 1 | 2 | 3 | 0 | 0 | 1 |
| 482 | 46 | 1 | 2 | 1 | 1 | 2 | 1 | 0 | 0 |
| 483 | 54 | 2 | 2 | 2 | 2 | 1 | 0 | 1 | 1 |
| 484 | 45 | 2 | 1 | 1 | 2 | 2 | 0 | 0 | 0 |
| 485 | 62 | 1 | 3 | 1 | 1 | 3 | 0 | 0 | 0 |
| 486 | 18 | 2 | 2 | 2 | 1 | 1 | 0 | 0 | 0 |
| 487 | 33 | 2 | 1 | 1 | 2 | 4 | 0 | 0 | 0 |
| 488 | 70 | 1 | 1 | 1 | 2 | 2 | 0 | 1 | 0 |
| 489 | 52 | 1 | 1 | 2 | 2 | 3 | 0 | 0 | 0 |
| 490 | 65 | 1 | 2 | 1 | 1 | 2 | 1 | 0 | 1 |
| 491 | 71 | 1 | 2 | 2 | 1 | 1 | 1 | 0 | 1 |
| 492 | 61 | 1 | 2 | 1 | 1 | 2 | 1 | 0 | 0 |

|     |    |   |   |   |   |   |   |   |   |
|-----|----|---|---|---|---|---|---|---|---|
| 493 | 55 | 1 | 2 | 1 | 2 | 3 | 0 | 0 | 0 |
| 494 | 57 | 1 | 3 | 1 | 1 | 4 | 1 | 0 | 0 |
| 495 | 57 | 1 | 2 | 1 | 2 | 2 | 0 | 0 | 0 |
| 496 | 72 | 2 | 1 | 1 | 2 | 2 | 0 | 0 | 0 |
| 497 | 58 | 1 | 2 | 1 | 2 | 2 | 1 | 0 | 0 |
| 498 | 46 | 2 | 2 | 1 | 2 | 4 | 0 | 0 | 0 |
| 499 | 59 | 2 | 1 | 1 | 2 | 3 | 0 | 0 | 0 |
| 500 | 52 | 1 | 2 | 1 | 2 | 2 | 0 | 0 | 0 |
| 501 | 65 | 1 | 3 | 1 | 1 | 3 | 0 | 0 | 1 |
| 502 | 34 | 1 | 3 | 1 | 2 | 2 | 0 | 0 | 1 |
| 503 | 49 | 1 | 2 | 1 | 1 | 1 | 0 | 0 | 0 |
| 504 | 45 | 2 | 2 | 1 | 2 | 2 | 0 | 0 | 0 |
| 505 | 79 | 1 | 1 | 1 | 1 | 3 | 0 | 0 | 0 |
| 506 | 61 | 2 | 2 | 1 | 1 | 2 | 0 | 0 | 1 |
| 507 | 61 | 2 | 1 | 1 | 1 | 2 | 0 | 1 | 0 |
| 508 | 55 | 1 | 1 | 1 | 1 | 2 | 1 | 0 | 0 |
| 509 | 52 | 2 | 2 | 2 | 1 | 1 | 0 | 1 | 0 |
| 510 | 54 | 1 | 2 | 1 | 1 | 2 | 0 | 0 | 0 |
| 511 | 41 | 2 | 2 | 1 | 2 | 1 | 0 | 0 | 0 |
| 512 | 55 | 1 | 1 | 1 | 1 | 2 | 0 | 0 | 0 |
| 513 | 61 | 1 | 2 | 1 | 2 | 2 | 0 | 0 | 0 |
| 514 | 72 | 1 | 1 | 1 | 2 | 2 | 0 | 0 | 0 |
| 515 | 57 | 2 | 2 | 1 | 2 | 1 | 1 | 1 | 0 |
| 516 | 62 | 1 | 2 | 1 | 2 | 2 | 0 | 0 | 0 |
| 517 | 75 | 1 | 1 | 1 | 2 | 2 | 0 | 0 | 0 |

|     |    |   |   |   |   |   |   |   |   |
|-----|----|---|---|---|---|---|---|---|---|
| 518 | 59 | 1 | 2 | 1 | 2 | 3 | 0 | 0 | 0 |
| 519 | 50 | 2 | 1 | 1 | 2 | 2 | 0 | 0 | 0 |
| 520 | 51 | 2 | 2 | 1 | 1 | 4 | 0 | 0 | 0 |
| 521 | 64 | 2 | 2 | 1 | 1 | 2 | 0 | 0 | 0 |
| 522 | 70 | 1 | 1 | 1 | 2 | 2 | 1 | 0 | 0 |
| 523 | 54 | 2 | 2 | 1 | 2 | 2 | 0 | 0 | 0 |
| 524 | 60 | 1 | 2 | 1 | 1 | 2 | 0 | 1 | 0 |
| 525 | 62 | 1 | 2 | 1 | 2 | 2 | 0 | 0 | 0 |
| 526 | 50 | 2 | 2 | 1 | 1 | 2 | 1 | 0 | 0 |
| 527 | 69 | 1 | 1 | 1 | 1 | 1 | 0 | 0 | 0 |
| 528 | 69 | 1 | 2 | 1 | 1 | 2 | 0 | 0 | 0 |
| 529 | 70 | 2 | 1 | 1 | 2 | 2 | 0 | 0 | 0 |
| 530 | 74 | 2 | 2 | 1 | 1 | 3 | 0 | 0 | 0 |
| 531 | 42 | 2 | 2 | 1 | 2 | 2 | 0 | 1 | 0 |
| 532 | 56 | 1 | 2 | 1 | 1 | 2 | 0 | 0 | 0 |
| 533 | 71 | 1 | 1 | 1 | 2 | 1 | 0 | 0 | 0 |
| 534 | 62 | 1 | 2 | 1 | 2 | 2 | 1 | 0 | 0 |
| 535 | 67 | 1 | 2 | 1 | 1 | 2 | 0 | 0 | 0 |
| 536 | 24 | 2 | 3 | 2 | 2 | 3 | 0 | 0 | 0 |
| 537 | 54 | 2 | 1 | 1 | 2 | 3 | 0 | 0 | 0 |
| 538 | 67 | 2 | 1 | 1 | 2 | 2 | 0 | 1 | 1 |
| 539 | 37 | 1 | 3 | 1 | 2 | 1 | 1 | 0 | 0 |
| 540 | 73 | 2 | 1 | 1 | 2 | 1 | 0 | 0 | 0 |
| 541 | 55 | 1 | 3 | 1 | 1 | 2 | 1 | 1 | 0 |
| 542 | 50 | 1 | 3 | 1 | 1 | 2 | 0 | 0 | 0 |

|     |    |   |   |   |   |   |   |   |   |
|-----|----|---|---|---|---|---|---|---|---|
| 543 | 53 | 2 | 1 | 1 | 2 | 2 | 0 | 0 | 0 |
| 544 | 44 | 1 | 3 | 1 | 1 | 2 | 0 | 0 | 0 |
| 545 | 57 | 1 | 1 | 1 | 2 | 2 | 0 | 0 | 0 |
| 546 | 54 | 1 | 1 | 1 | 2 | 2 | 0 | 0 | 0 |
| 547 | 56 | 1 | 1 | 1 | 2 | 3 | 0 | 0 | 1 |
| 548 | 51 | 2 | 2 | 1 | 2 | 2 | 0 | 0 | 0 |
| 549 | 51 | 2 | 2 | 1 | 2 | 2 | 0 | 0 | 0 |
| 550 | 49 | 2 | 2 | 1 | 1 | 2 | 0 | 0 | 1 |
| 551 | 75 | 1 | 1 | 1 | 2 | 1 | 0 | 0 | 0 |
| 552 | 61 | 1 | 2 | 1 | 1 | 2 | 1 | 0 | 1 |
| 553 | 56 | 1 | 2 | 1 | 2 | 2 | 1 | 0 | 1 |
| 554 | 56 | 1 | 2 | 1 | 1 | 1 | 0 | 0 | 0 |
| 555 | 46 | 1 | 2 | 1 | 2 | 1 | 1 | 0 | 1 |
| 556 | 80 | 2 | 1 | 1 | 2 | 1 | 0 | 0 | 0 |
| 557 | 51 | 1 | 2 | 1 | 1 | 4 | 0 | 0 | 0 |
| 558 | 46 | 1 | 3 | 1 | 1 | 1 | 0 | 1 | 0 |
| 559 | 45 | 1 | 3 | 1 | 2 | 2 | 1 | 1 | 0 |
| 560 | 42 | 2 | 1 | 1 | 2 | 2 | 0 | 0 | 1 |
| 561 | 49 | 1 | 2 | 1 | 2 | 1 | 0 | 1 | 0 |
| 562 | 60 | 1 | 2 | 1 | 1 | 4 | 0 | 0 | 0 |
| 563 | 46 | 1 | 2 | 1 | 1 | 2 | 0 | 0 | 0 |
| 564 | 53 | 1 | 2 | 1 | 2 | 2 | 0 | 0 | 0 |
| 565 | 76 | 1 | 1 | 1 | 2 | 1 | 1 | 0 | 0 |
| 566 | 68 | 1 | 3 | 1 | 1 | 2 | 1 | 0 | 0 |
| 567 | 63 | 2 | 1 | 1 | 2 | 2 | 1 | 0 | 0 |

|     |    |   |   |   |   |   |   |   |   |
|-----|----|---|---|---|---|---|---|---|---|
| 568 | 48 | 2 | 3 | 1 | 1 | 1 | 1 | 0 | 0 |
| 569 | 59 | 1 | 3 | 1 | 1 | 2 | 1 | 1 | 0 |
| 570 | 50 | 1 | 1 | 1 | 1 | 2 | 0 | 0 | 0 |
| 571 | 65 | 2 | 2 | 1 | 1 | 2 | 0 | 0 | 0 |
| 572 | 72 | 2 | 1 | 1 | 1 | 1 | 1 | 0 | 0 |
| 573 | 68 | 2 | 1 | 1 | 1 | 1 | 0 | 0 | 0 |
| 574 | 75 | 1 | 1 | 1 | 1 | 1 | 0 | 0 | 0 |
| 575 | 37 | 2 | 2 | 1 | 1 | 3 | 1 | 0 | 1 |
| 576 | 47 | 2 | 2 | 1 | 2 | 1 | 0 | 0 | 1 |
| 577 | 65 | 1 | 2 | 1 | 2 | 2 | 0 | 0 | 0 |
| 578 | 52 | 1 | 2 | 1 | 2 | 1 | 0 | 0 | 1 |
| 579 | 30 | 2 | 2 | 1 | 2 | 2 | 1 | 0 | 0 |
| 580 | 50 | 1 | 2 | 1 | 2 | 2 | 0 | 1 | 1 |
| 581 | 71 | 1 | 1 | 1 | 1 | 3 | 1 | 0 | 1 |
| 582 | 79 | 2 | 3 | 1 | 1 | 1 | 1 | 0 | 0 |
| 583 | 70 | 1 | 2 | 1 | 2 | 4 | 1 | 0 | 0 |
| 584 | 48 | 2 | 2 | 1 | 2 | 3 | 0 | 0 | 1 |
| 585 | 75 | 1 | 1 | 1 | 1 | 1 | 1 | 0 | 0 |
| 586 | 62 | 1 | 1 | 1 | 2 | 1 | 0 | 0 | 0 |
| 587 | 55 | 1 | 2 | 1 | 2 | 2 | 1 | 0 | 0 |
| 588 | 53 | 1 | 2 | 1 | 1 | 3 | 0 | 0 | 0 |
| 589 | 46 | 1 | 2 | 1 | 2 | 1 | 0 | 0 | 1 |
| 590 | 78 | 2 | 2 | 1 | 1 | 4 | 0 | 0 | 0 |
| 591 | 67 | 2 | 2 | 1 | 1 | 2 | 0 | 0 | 0 |
| 592 | 50 | 1 | 1 | 1 | 2 | 3 | 0 | 0 | 0 |



|     |    |   |   |   |   |   |   |   |   |
|-----|----|---|---|---|---|---|---|---|---|
| 593 | 66 | 2 | 2 | 1 | 2 | 2 | 0 | 0 | 0 |
| 594 | 55 | 2 | 1 | 1 | 1 | 2 | 0 | 0 | 1 |
| 595 | 54 | 2 | 1 | 1 | 2 | 3 | 1 | 0 | 1 |
| 596 | 63 | 1 | 1 | 1 | 1 | 3 | 1 | 0 | 0 |
| 597 | 32 | 2 | 3 | 1 | 1 | 1 | 0 | 0 | 1 |
| 598 | 63 | 1 | 2 | 1 | 1 | 1 | 0 | 0 | 0 |
| 599 | 68 | 2 | 1 | 1 | 2 | 2 | 0 | 0 | 0 |
| 600 | 38 | 2 | 2 | 1 | 2 | 2 | 0 | 0 | 0 |
| 601 | 77 | 1 | 1 | 1 | 2 | 2 | 0 | 0 | 0 |
| 602 | 73 | 2 | 1 | 1 | 1 | 2 | 0 | 0 | 0 |
| 603 | 64 | 1 | 2 | 1 | 1 | 2 | 0 | 0 | 0 |
| 604 | 34 | 1 | 2 | 1 | 1 | 2 | 0 | 0 | 0 |
| 605 | 45 | 2 | 1 | 1 | 1 | 2 | 0 | 0 | 0 |
| 606 | 73 | 1 | 1 | 1 | 2 | 1 | 1 | 0 | 0 |
| 607 | 62 | 1 | 2 | 1 | 2 | 2 | 0 | 1 | 0 |
| 608 | 69 | 1 | 2 | 1 | 1 | 1 | 0 | 0 | 1 |
| 609 | 36 | 2 | 3 | 2 | 1 | 1 | 0 | 0 | 0 |
| 610 | 67 | 2 | 1 | 1 | 1 | 2 | 1 | 0 | 0 |
| 611 | 75 | 1 | 1 | 1 | 2 | 2 | 1 | 0 | 0 |
| 612 | 30 | 1 | 2 | 1 | 2 | 1 | 0 | 1 | 0 |
| 613 | 46 | 2 | 1 | 1 | 2 | 1 | 0 | 0 | 0 |
| 614 | 30 | 2 | 2 | 1 | 2 | 2 | 0 | 0 | 0 |
| 615 | 54 | 1 | 1 | 1 | 2 | 1 | 0 | 0 | 0 |
| 616 | 59 | 1 | 2 | 1 | 2 | 1 | 0 | 0 | 1 |
| 617 | 66 | 1 | 2 | 1 | 2 | 1 | 0 | 0 | 0 |

|     |    |   |   |   |   |   |   |   |   |
|-----|----|---|---|---|---|---|---|---|---|
| 618 | 56 | 1 | 3 | 1 | 1 | 3 | 1 | 0 | 0 |
| 619 | 51 | 1 | 2 | 1 | 1 | 3 | 1 | 0 | 0 |
| 620 | 30 | 2 | 2 | 1 | 2 | 3 | 0 | 0 | 0 |
| 621 | 59 | 2 | 2 | 1 | 2 | 4 | 0 | 0 | 0 |
| 622 | 52 | 2 | 1 | 1 | 2 | 2 | 1 | 0 | 0 |
| 623 | 48 | 1 | 2 | 1 | 2 | 2 | 0 | 0 | 0 |
| 624 | 49 | 2 | 2 | 1 | 2 | 4 | 0 | 0 | 0 |
| 625 | 55 | 1 | 3 | 1 | 1 | 2 | 1 | 0 | 0 |
| 626 | 66 | 1 | 1 | 1 | 1 | 2 | 0 | 0 | 0 |
| 627 | 80 | 2 | 1 | 1 | 2 | 1 | 0 | 0 | 0 |
| 628 | 43 | 2 | 2 | 1 | 2 | 2 | 0 | 0 | 0 |
| 629 | 54 | 1 | 2 | 1 | 1 | 1 | 0 | 0 | 0 |
| 630 | 31 | 1 | 3 | 1 | 2 | 1 | 0 | 0 | 0 |
| 631 | 62 | 1 | 1 | 1 | 2 | 1 | 0 | 0 | 0 |
| 632 | 55 | 1 | 2 | 1 | 2 | 1 | 0 | 0 | 0 |
| 633 | 65 | 1 | 1 | 1 | 2 | 2 | 0 | 0 | 0 |
| 634 | 68 | 1 | 1 | 1 | 2 | 2 | 0 | 0 | 0 |
| 635 | 52 | 1 | 1 | 1 | 2 | 3 | 0 | 0 | 0 |
| 636 | 48 | 2 | 2 | 1 | 2 | 4 | 0 | 0 | 0 |
| 637 | 63 | 1 | 2 | 1 | 2 | 2 | 0 | 1 | 0 |
| 638 | 48 | 2 | 1 | 1 | 2 | 4 | 0 | 1 | 0 |
| 639 | 65 | 2 | 1 | 1 | 2 | 1 | 1 | 0 | 0 |
| 640 | 40 | 1 | 3 | 1 | 1 | 3 | 0 | 0 | 0 |
| 641 | 57 | 1 | 3 | 1 | 2 | 1 | 0 | 1 | 1 |
| 642 | 56 | 1 | 2 | 1 | 2 | 2 | 0 | 0 | 0 |

|     |    |   |   |   |   |   |   |   |   |
|-----|----|---|---|---|---|---|---|---|---|
| 643 | 53 | 2 | 3 | 1 | 1 | 1 | 1 | 0 | 0 |
| 644 | 50 | 2 | 1 | 1 | 2 | 3 | 0 | 0 | 0 |
| 645 | 32 | 2 | 3 | 1 | 2 | 3 | 1 | 1 | 0 |
| 646 | 58 | 1 | 2 | 1 | 2 | 1 | 0 | 0 | 0 |
| 647 | 43 | 2 | 2 | 1 | 2 | 2 | 1 | 0 | 0 |
| 648 | 72 | 1 | 3 | 1 | 1 | 2 | 1 | 0 | 1 |
| 649 | 55 | 1 | 2 | 1 | 2 | 2 | 1 | 0 | 1 |
| 650 | 53 | 2 | 1 | 1 | 1 | 2 | 0 | 0 | 0 |
| 651 | 62 | 1 | 3 | 1 | 1 | 2 | 0 | 0 | 0 |
| 652 | 54 | 1 | 3 | 1 | 2 | 1 | 0 | 0 | 0 |
| 653 | 54 | 1 | 2 | 1 | 2 | 2 | 0 | 0 | 1 |
| 654 | 31 | 2 | 2 | 1 | 2 | 1 | 0 | 0 | 0 |
| 655 | 55 | 2 | 2 | 1 | 2 | 2 | 0 | 0 | 0 |
| 656 | 64 | 2 | 1 | 1 | 2 | 3 | 0 | 0 | 0 |
| 657 | 36 | 1 | 2 | 1 | 2 | 3 | 0 | 0 | 0 |
| 658 | 49 | 1 | 2 | 1 | 2 | 2 | 1 | 0 | 1 |
| 659 | 61 | 1 | 1 | 1 | 2 | 2 | 0 | 0 | 0 |
| 660 | 24 | 2 | 3 | 2 | 1 | 1 | 0 | 0 | 1 |
| 661 | 34 | 1 | 2 | 1 | 2 | 1 | 0 | 0 | 1 |
| 662 | 59 | 1 | 2 | 1 | 2 | 2 | 0 | 0 | 0 |
| 663 | 73 | 1 | 2 | 1 | 2 | 2 | 0 | 0 | 0 |
| 664 | 75 | 1 | 1 | 1 | 2 | 2 | 1 | 0 | 0 |
| 665 | 50 | 2 | 2 | 1 | 2 | 1 | 0 | 0 | 0 |
| 666 | 59 | 1 | 1 | 1 | 2 | 1 | 0 | 0 | 0 |
| 667 | 71 | 1 | 1 | 1 | 2 | 2 | 0 | 0 | 1 |

|     |    |   |   |   |   |   |   |   |   |
|-----|----|---|---|---|---|---|---|---|---|
| 668 | 61 | 1 | 3 | 1 | 1 | 2 | 1 | 0 | 0 |
| 669 | 67 | 2 | 2 | 1 | 2 | 2 | 0 | 0 | 0 |
| 670 | 68 | 1 | 2 | 1 | 1 | 1 | 0 | 1 | 0 |
| 671 | 45 | 2 | 2 | 1 | 2 | 2 | 0 | 0 | 0 |
| 672 | 68 | 2 | 1 | 1 | 2 | 1 | 0 | 0 | 0 |
| 673 | 47 | 1 | 1 | 1 | 2 | 1 | 0 | 0 | 0 |
| 674 | 55 | 2 | 2 | 1 | 2 | 4 | 0 | 0 | 0 |
| 675 | 56 | 1 | 1 | 1 | 2 | 2 | 0 | 0 | 0 |
| 676 | 48 | 2 | 1 | 1 | 2 | 1 | 0 | 0 | 0 |
| 677 | 59 | 1 | 2 | 1 | 1 | 2 | 0 | 1 | 0 |
| 678 | 76 | 2 | 2 | 1 | 2 | 3 | 0 | 0 | 0 |
| 679 | 63 | 2 | 2 | 1 | 2 | 3 | 1 | 0 | 0 |
| 680 | 55 | 1 | 2 | 1 | 2 | 2 | 0 | 0 | 0 |
| 681 | 58 | 1 | 2 | 1 | 2 | 2 | 0 | 0 | 0 |
| 682 | 53 | 2 | 2 | 1 | 2 | 1 | 0 | 0 | 0 |
| 683 | 63 | 2 | 2 | 1 | 2 | 1 | 0 | 0 | 0 |
| 684 | 80 | 1 | 1 | 1 | 2 | 2 | 1 | 0 | 0 |
| 685 | 56 | 1 | 2 | 1 | 1 | 2 | 0 | 0 | 0 |
| 686 | 65 | 1 | 2 | 1 | 2 | 2 | 0 | 0 | 0 |
| 687 | 44 | 2 | 1 | 1 | 2 | 2 | 0 | 0 | 0 |
| 688 | 57 | 2 | 1 | 1 | 2 | 2 | 1 | 1 | 0 |
| 689 | 67 | 1 | 1 | 1 | 1 | 2 | 0 | 0 | 0 |
| 690 | 46 | 2 | 1 | 1 | 2 | 1 | 0 | 0 | 0 |
| 691 | 61 | 2 | 2 | 1 | 2 | 1 | 0 | 1 | 0 |
| 692 | 56 | 2 | 2 | 1 | 1 | 1 | 0 | 0 | 0 |

|     |    |   |   |   |   |   |   |   |   |
|-----|----|---|---|---|---|---|---|---|---|
| 693 | 72 | 1 | 1 | 1 | 2 | 1 | 0 | 0 | 0 |
| 694 | 31 | 1 | 3 | 1 | 1 | 1 | 0 | 0 | 0 |
| 695 | 57 | 2 | 2 | 1 | 1 | 1 | 1 | 1 | 1 |
| 696 | 41 | 1 | 3 | 1 | 1 | 1 | 0 | 0 | 0 |
| 697 | 61 | 1 | 2 | 1 | 2 | 3 | 0 | 0 | 0 |
| 698 | 60 | 1 | 2 | 1 | 2 | 1 | 0 | 1 | 0 |
| 699 | 57 | 2 | 2 | 1 | 2 | 1 | 1 | 1 | 0 |
| 700 | 46 | 1 | 1 | 1 | 2 | 2 | 1 | 1 | 1 |
| 701 | 69 | 1 | 1 | 1 | 2 | 2 | 0 | 0 | 0 |
| 702 | 42 | 2 | 2 | 1 | 2 | 2 | 0 | 0 | 0 |
| 703 | 64 | 1 | 2 | 1 | 2 | 2 | 0 | 1 | 0 |
| 704 | 56 | 2 | 1 | 1 | 2 | 1 | 0 | 0 | 0 |
| 705 | 71 | 1 | 1 | 1 | 2 | 2 | 0 | 0 | 0 |
| 706 | 74 | 1 | 2 | 1 | 1 | 2 | 0 | 0 | 0 |
| 707 | 57 | 1 | 3 | 1 | 2 | 1 | 0 | 0 | 0 |
| 708 | 55 | 1 | 2 | 1 | 2 | 2 | 0 | 0 | 0 |
| 709 | 67 | 1 | 1 | 1 | 1 | 3 | 0 | 0 | 0 |
| 710 | 50 | 2 | 1 | 1 | 2 | 2 | 0 | 0 | 0 |
| 711 | 51 | 2 | 1 | 1 | 2 | 3 | 0 | 0 | 0 |
| 712 | 53 | 1 | 1 | 1 | 2 | 1 | 1 | 1 | 0 |
| 713 | 52 | 1 | 2 | 1 | 2 | 4 | 0 | 0 | 0 |
| 714 | 61 | 2 | 1 | 1 | 2 | 2 | 0 | 0 | 0 |
| 715 | 61 | 1 | 2 | 1 | 1 | 3 | 0 | 0 | 0 |
| 716 | 50 | 1 | 1 | 1 | 2 | 1 | 0 | 0 | 1 |
| 717 | 65 | 2 | 1 | 1 | 2 | 2 | 0 | 0 | 0 |

|     |    |   |   |   |   |   |   |   |   |
|-----|----|---|---|---|---|---|---|---|---|
| 718 | 55 | 1 | 1 | 1 | 1 | 2 | 0 | 0 | 1 |
| 719 | 46 | 1 | 2 | 1 | 2 | 4 | 0 | 0 | 0 |
| 720 | 62 | 1 | 2 | 1 | 1 | 2 | 0 | 0 | 0 |
| 721 | 47 | 2 | 2 | 1 | 2 | 2 | 0 | 0 | 0 |
| 722 | 49 | 2 | 2 | 1 | 2 | 2 | 0 | 0 | 1 |
| 723 | 56 | 1 | 3 | 1 | 2 | 2 | 0 | 0 | 0 |
| 724 | 46 | 2 | 3 | 1 | 1 | 2 | 0 | 0 | 0 |
| 725 | 52 | 2 | 2 | 1 | 2 | 2 | 0 | 0 | 0 |
| 726 | 68 | 1 | 3 | 1 | 1 | 1 | 0 | 0 | 1 |
| 727 | 66 | 1 | 1 | 1 | 2 | 2 | 0 | 0 | 0 |
| 728 | 51 | 2 | 2 | 1 | 2 | 2 | 0 | 0 | 0 |
| 729 | 65 | 2 | 1 | 1 | 2 | 3 | 0 | 0 | 0 |
| 730 | 18 | 1 | 2 | 1 | 2 | 1 | 1 | 1 | 0 |
| 731 | 66 | 1 | 1 | 1 | 2 | 2 | 0 | 0 | 1 |
| 732 | 59 | 1 | 2 | 1 | 2 | 3 | 0 | 0 | 1 |
| 733 | 52 | 2 | 1 | 1 | 2 | 1 | 0 | 0 | 0 |
| 734 | 83 | 1 | 2 | 1 | 1 | 2 | 1 | 0 | 0 |
| 735 | 57 | 2 | 2 | 1 | 2 | 2 | 0 | 0 | 0 |
| 736 | 60 | 2 | 2 | 1 | 2 | 2 | 0 | 0 | 0 |
| 737 | 66 | 1 | 2 | 1 | 1 | 1 | 0 | 0 | 0 |
| 738 | 72 | 2 | 1 | 1 | 2 | 2 | 0 | 0 | 0 |
| 739 | 49 | 1 | 2 | 1 | 2 | 2 | 0 | 0 | 0 |
| 740 | 83 | 1 | 1 | 1 | 1 | 3 | 1 | 0 | 1 |
| 741 | 58 | 1 | 2 | 1 | 2 | 3 | 1 | 0 | 1 |
| 742 | 68 | 1 | 2 | 1 | 2 | 2 | 1 | 0 | 0 |

|     |    |   |   |   |   |   |   |   |   |
|-----|----|---|---|---|---|---|---|---|---|
| 743 | 55 | 1 | 3 | 2 | 2 | 3 | 0 | 0 | 1 |
| 744 | 73 | 1 | 2 | 1 | 2 | 1 | 0 | 0 | 0 |
| 745 | 53 | 2 | 1 | 1 | 2 | 2 | 0 | 0 | 0 |
| 746 | 74 | 2 | 2 | 1 | 1 | 1 | 1 | 1 | 0 |
| 747 | 40 | 1 | 3 | 1 | 2 | 2 | 0 | 0 | 0 |
| 748 | 66 | 2 | 2 | 1 | 2 | 2 | 0 | 0 | 0 |
| 749 | 62 | 1 | 2 | 1 | 1 | 1 | 0 | 0 | 0 |
| 750 | 61 | 2 | 1 | 1 | 2 | 2 | 1 | 0 | 0 |
| 751 | 33 | 2 | 2 | 1 | 2 | 2 | 0 | 0 | 0 |
| 752 | 49 | 1 | 1 | 2 | 2 | 3 | 0 | 0 | 0 |
| 753 | 43 | 2 | 2 | 1 | 2 | 2 | 0 | 1 | 0 |
| 754 | 69 | 1 | 2 | 2 | 2 | 3 | 0 | 0 | 0 |
| 755 | 50 | 2 | 3 | 1 | 1 | 2 | 1 | 1 | 0 |
| 756 | 54 | 2 | 3 | 1 | 1 | 2 | 1 | 0 | 0 |
| 757 | 50 | 2 | 2 | 1 | 2 | 2 | 0 | 0 | 0 |
| 758 | 51 | 2 | 3 | 1 | 2 | 3 | 0 | 0 | 1 |
| 759 | 49 | 2 | 2 | 1 | 2 | 3 | 1 | 0 | 0 |
| 760 | 53 | 1 | 2 | 1 | 2 | 2 | 1 | 1 | 1 |
| 761 | 70 | 2 | 1 | 1 | 1 | 3 | 0 | 0 | 0 |
| 762 | 73 | 1 | 1 | 1 | 1 | 2 | 0 | 1 | 1 |
| 763 | 65 | 2 | 3 | 1 | 1 | 4 | 0 | 1 | 0 |
| 764 | 65 | 1 | 1 | 1 | 1 | 2 | 1 | 0 | 0 |
| 765 | 48 | 1 | 3 | 1 | 1 | 2 | 0 | 0 | 0 |
| 766 | 63 | 1 | 2 | 2 | 2 | 4 | 1 | 0 | 0 |
| 767 | 53 | 1 | 2 | 1 | 2 | 3 | 0 | 0 | 0 |

|     |    |   |   |   |   |   |   |   |   |
|-----|----|---|---|---|---|---|---|---|---|
| 768 | 64 | 2 | 1 | 1 | 2 | 1 | 0 | 0 | 0 |
| 769 | 52 | 2 | 2 | 1 | 1 | 2 | 1 | 0 | 0 |
| 770 | 61 | 2 | 1 | 1 | 2 | 2 | 1 | 0 | 0 |
| 771 | 69 | 2 | 2 | 1 | 2 | 2 | 0 | 0 | 1 |
| 772 | 40 | 1 | 3 | 1 | 1 | 3 | 0 | 0 | 0 |
| 773 | 48 | 2 | 2 | 2 | 1 | 2 | 0 | 0 | 0 |
| 774 | 55 | 2 | 1 | 1 | 2 | 4 | 0 | 0 | 0 |
| 775 | 46 | 1 | 1 | 1 | 1 | 2 | 1 | 0 | 1 |
| 776 | 34 | 2 | 2 | 1 | 2 | 2 | 0 | 0 | 0 |
| 777 | 53 | 2 | 2 | 1 | 1 | 2 | 1 | 0 | 1 |
| 778 | 51 | 1 | 3 | 1 | 1 | 2 | 0 | 0 | 0 |
| 779 | 70 | 2 | 1 | 1 | 1 | 2 | 1 | 0 | 0 |
| 780 | 59 | 2 | 2 | 1 | 1 | 2 | 0 | 1 | 1 |
| 781 | 45 | 2 | 1 | 1 | 2 | 4 | 0 | 0 | 0 |
| 782 | 49 | 2 | 1 | 1 | 2 | 3 | 1 | 0 | 1 |
| 783 | 53 | 2 | 1 | 1 | 1 | 3 | 0 | 1 | 0 |
| 784 | 45 | 2 | 1 | 1 | 2 | 2 | 0 | 0 | 0 |
| 785 | 82 | 1 | 1 | 1 | 2 | 2 | 0 | 0 | 0 |
| 786 | 60 | 1 | 1 | 1 | 1 | 1 | 1 | 0 | 0 |
| 787 | 67 | 1 | 1 | 1 | 1 | 2 | 1 | 0 | 0 |
| 788 | 63 | 2 | 2 | 1 | 1 | 2 | 1 | 0 | 1 |
| 789 | 42 | 1 | 2 | 1 | 1 | 1 | 1 | 0 | 0 |
| 790 | 47 | 2 | 2 | 1 | 1 | 1 | 0 | 1 | 0 |
| 791 | 66 | 2 | 1 | 1 | 1 | 2 | 0 | 0 | 0 |
| 792 | 53 | 1 | 2 | 1 | 1 | 1 | 1 | 0 | 0 |



|     |    |   |   |   |   |   |   |   |   |
|-----|----|---|---|---|---|---|---|---|---|
| 793 | 45 | 2 | 1 | 1 | 1 | 2 | 0 | 0 | 0 |
| 794 | 65 | 1 | 1 | 1 | 1 | 1 | 1 | 0 | 1 |
| 795 | 36 | 2 | 2 | 1 | 2 | 2 | 0 | 0 | 1 |
| 796 | 37 | 2 | 3 | 1 | 1 | 1 | 0 | 0 | 0 |
| 797 | 64 | 1 | 2 | 1 | 2 | 1 | 0 | 0 | 0 |
| 798 | 31 | 2 | 2 | 1 | 2 | 1 | 0 | 0 | 0 |

| number | Liver metastasis | Metastasis(1yes;<br>0no) | Metastasis<br>number (0<br>none; 1 one;<br>2 two; 3 three<br>and above) |                                  |                   |                      |   |   |   | lung cancer | breast cancer | colorectal cancer |
|--------|------------------|--------------------------|-------------------------------------------------------------------------|----------------------------------|-------------------|----------------------|---|---|---|-------------|---------------|-------------------|
|        |                  |                          | head and<br>neck<br>cancer                                              | Liver and<br>Cholecyst<br>cancer | gastric<br>cancer | pancreatic<br>cancer |   |   |   |             |               |                   |
| 1      | 0                | 1                        | 1                                                                       | 1                                | 0                 | 0                    | 0 | 0 | 0 | 0           | 0             |                   |
| 2      | 0                | 1                        | 1                                                                       | 0                                | 0                 | 0                    | 1 | 0 | 0 | 0           | 0             |                   |
| 3      | 0                | 1                        | 1                                                                       | 0                                | 0                 | 0                    | 0 | 0 | 0 | 0           | 0             |                   |
| 4      | 0                | 1                        | 3                                                                       | 0                                | 0                 | 1                    | 0 | 0 | 0 | 0           | 0             |                   |
| 5      | 1                | 1                        | 1                                                                       | 0                                | 0                 | 0                    | 0 | 0 | 0 | 0           | 1             |                   |
| 6      | 0                | 1                        | 2                                                                       | 0                                | 0                 | 0                    | 0 | 1 | 0 | 0           | 0             |                   |
| 7      | 1                | 1                        | 2                                                                       | 0                                | 0                 | 0                    | 0 | 1 | 0 | 0           | 0             |                   |
| 8      | 1                | 1                        | 2                                                                       | 0                                | 1                 | 0                    | 0 | 0 | 0 | 0           | 0             |                   |
| 9      | 0                | 1                        | 1                                                                       | 0                                | 0                 | 0                    | 0 | 1 | 0 | 0           | 0             |                   |
| 10     | 0                | 1                        | 1                                                                       | 0                                | 0                 | 0                    | 0 | 0 | 0 | 0           | 0             |                   |
| 11     | 1                | 1                        | 3                                                                       | 1                                | 0                 | 0                    | 0 | 0 | 0 | 0           | 0             |                   |
| 12     | 0                | 1                        | 2                                                                       | 0                                | 0                 | 0                    | 0 | 1 | 0 | 0           | 0             |                   |
| 13     | 0                | 1                        | 2                                                                       | 0                                | 0                 | 0                    | 0 | 1 | 0 | 0           | 0             |                   |

|    |   |   |   |   |   |   |   |   |   |   |
|----|---|---|---|---|---|---|---|---|---|---|
| 14 | 1 | 1 | 3 | 0 | 0 | 0 | 0 | 1 | 0 | 0 |
| 15 | 0 | 0 | 0 | 0 | 0 | 0 | 0 | 1 | 0 | 0 |
| 16 | 0 | 0 | 0 | 1 | 0 | 0 | 0 | 0 | 0 | 0 |
| 17 | 1 | 1 | 1 | 0 | 0 | 0 | 0 | 1 | 0 | 0 |
| 18 | 0 | 0 | 0 | 1 | 0 | 0 | 0 | 0 | 0 | 0 |
| 19 | 1 | 1 | 2 | 0 | 0 | 0 | 0 | 0 | 0 | 0 |
| 20 | 0 | 1 | 1 | 0 | 0 | 0 | 0 | 0 | 1 | 0 |
| 21 | 1 | 1 | 2 | 0 | 0 | 0 | 0 | 1 | 0 | 0 |
| 22 | 0 | 1 | 1 | 0 | 0 | 0 | 0 | 0 | 0 | 0 |
| 23 | 0 | 1 | 1 | 1 | 0 | 0 | 0 | 0 | 0 | 0 |
| 24 | 0 | 0 | 0 | 0 | 0 | 0 | 0 | 0 | 0 | 0 |
| 25 | 1 | 1 | 3 | 0 | 0 | 0 | 0 | 1 | 0 | 0 |
| 26 | 0 | 1 | 3 | 0 | 0 | 0 | 0 | 0 | 0 | 0 |
| 27 | 0 | 1 | 1 | 0 | 0 | 0 | 0 | 1 | 0 | 0 |
| 28 | 1 | 1 | 1 | 0 | 0 | 0 | 0 | 0 | 1 | 0 |
| 29 | 0 | 1 | 2 | 1 | 0 | 0 | 0 | 0 | 0 | 0 |
| 30 | 1 | 1 | 3 | 0 | 0 | 0 | 0 | 0 | 1 | 0 |
| 31 | 0 | 0 | 0 | 0 | 0 | 0 | 0 | 0 | 0 | 0 |
| 32 | 1 | 1 | 2 | 0 | 0 | 0 | 0 | 0 | 0 | 1 |
| 33 | 1 | 1 | 3 | 0 | 0 | 0 | 0 | 0 | 0 | 1 |
| 34 | 0 | 1 | 2 | 0 | 0 | 1 | 0 | 0 | 0 | 0 |
| 35 | 0 | 1 | 2 | 1 | 0 | 0 | 0 | 0 | 0 | 0 |
| 36 | 0 | 1 | 1 | 0 | 0 | 0 | 0 | 0 | 0 | 0 |
| 37 | 1 | 1 | 3 | 0 | 0 | 0 | 0 | 0 | 1 | 0 |
| 38 | 1 | 1 | 2 | 0 | 0 | 0 | 0 | 0 | 0 | 1 |

|    |   |   |   |   |   |   |   |   |   |   |   |
|----|---|---|---|---|---|---|---|---|---|---|---|
| 39 | 0 | 1 | 1 | 0 | 1 | 0 | 0 | 0 | 0 | 0 | 0 |
| 40 | 0 | 1 | 3 | 0 | 0 | 0 | 0 | 0 | 0 | 0 | 1 |
| 41 | 0 | 0 | 0 | 0 | 0 | 0 | 0 | 0 | 0 | 0 | 0 |
| 42 | 0 | 1 | 1 | 0 | 0 | 0 | 0 | 0 | 0 | 0 | 0 |
| 43 | 0 | 1 | 1 | 0 | 0 | 1 | 0 | 0 | 0 | 0 | 0 |
| 44 | 0 | 0 | 0 | 0 | 1 | 0 | 0 | 0 | 0 | 0 | 0 |
| 45 | 0 | 1 | 2 | 0 | 0 | 0 | 0 | 0 | 0 | 0 | 1 |
| 46 | 0 | 0 | 0 | 0 | 0 | 0 | 0 | 1 | 0 | 0 | 0 |
| 47 | 0 | 0 | 0 | 0 | 0 | 0 | 1 | 0 | 0 | 0 | 0 |
| 48 | 0 | 1 | 1 | 0 | 0 | 0 | 0 | 0 | 0 | 0 | 0 |
| 49 | 0 | 0 | 0 | 0 | 0 | 0 | 0 | 1 | 0 | 0 | 0 |
| 50 | 1 | 1 | 3 | 0 | 0 | 0 | 0 | 0 | 0 | 0 | 0 |
| 51 | 0 | 1 | 1 | 0 | 0 | 0 | 0 | 1 | 0 | 0 | 0 |
| 52 | 0 | 1 | 2 | 1 | 0 | 0 | 0 | 0 | 0 | 0 | 0 |
| 53 | 1 | 1 | 3 | 0 | 0 | 0 | 0 | 1 | 0 | 0 | 0 |
| 54 | 0 | 1 | 1 | 0 | 0 | 0 | 0 | 0 | 0 | 0 | 0 |
| 55 | 0 | 0 | 0 | 0 | 0 | 0 | 0 | 1 | 0 | 0 | 0 |
| 56 | 0 | 1 | 2 | 0 | 0 | 0 | 0 | 1 | 0 | 0 | 0 |
| 57 | 0 | 1 | 3 | 0 | 0 | 0 | 0 | 0 | 0 | 0 | 0 |
| 58 | 1 | 1 | 3 | 0 | 0 | 0 | 0 | 0 | 0 | 0 | 0 |
| 59 | 1 | 1 | 1 | 0 | 0 | 0 | 0 | 0 | 0 | 0 | 1 |
| 60 | 0 | 1 | 3 | 0 | 0 | 0 | 0 | 0 | 0 | 0 | 1 |
| 61 | 0 | 0 | 0 | 0 | 0 | 0 | 0 | 0 | 0 | 0 | 0 |
| 62 | 1 | 1 | 3 | 0 | 0 | 0 | 0 | 0 | 0 | 0 | 0 |
| 63 | 1 | 1 | 3 | 0 | 0 | 0 | 0 | 0 | 0 | 0 | 0 |

|    |   |   |   |   |   |   |   |   |   |   |   |
|----|---|---|---|---|---|---|---|---|---|---|---|
| 64 | 0 | 0 | 0 | 1 | 0 | 0 | 0 | 0 | 0 | 0 | 0 |
| 65 | 0 | 1 | 2 | 1 | 0 | 0 | 0 | 0 | 0 | 0 | 0 |
| 66 | 0 | 0 | 0 | 0 | 0 | 0 | 0 | 0 | 0 | 0 | 0 |
| 67 | 0 | 1 | 1 | 0 | 0 | 0 | 0 | 0 | 0 | 0 | 1 |
| 68 | 1 | 1 | 3 | 0 | 0 | 0 | 0 | 0 | 0 | 0 | 0 |
| 69 | 0 | 0 | 0 | 1 | 0 | 0 | 0 | 0 | 0 | 0 | 0 |
| 70 | 0 | 1 | 1 | 0 | 0 | 0 | 0 | 0 | 0 | 0 | 0 |
| 71 | 0 | 1 | 1 | 0 | 0 | 0 | 0 | 1 | 0 | 0 | 0 |
| 72 | 0 | 1 | 2 | 0 | 0 | 0 | 0 | 0 | 0 | 0 | 0 |
| 73 | 0 | 1 | 2 | 0 | 0 | 0 | 0 | 1 | 0 | 0 | 0 |
| 74 | 0 | 1 | 1 | 0 | 1 | 0 | 0 | 0 | 0 | 0 | 0 |
| 75 | 1 | 1 | 2 | 0 | 0 | 0 | 0 | 0 | 0 | 0 | 0 |
| 76 | 0 | 1 | 1 | 0 | 0 | 0 | 0 | 0 | 0 | 0 | 0 |
| 77 | 0 | 1 | 1 | 0 | 0 | 0 | 0 | 0 | 0 | 0 | 0 |
| 78 | 0 | 0 | 0 | 0 | 0 | 0 | 0 | 0 | 0 | 0 | 0 |
| 79 | 0 | 1 | 1 | 0 | 0 | 0 | 0 | 1 | 0 | 0 | 0 |
| 80 | 1 | 1 | 2 | 0 | 0 | 0 | 0 | 0 | 0 | 0 | 0 |
| 81 | 0 | 1 | 1 | 0 | 0 | 0 | 0 | 1 | 0 | 0 | 0 |
| 82 | 1 | 1 | 2 | 0 | 0 | 0 | 0 | 0 | 0 | 0 | 1 |
| 83 | 1 | 1 | 2 | 0 | 0 | 0 | 0 | 0 | 0 | 0 | 0 |
| 84 | 1 | 1 | 1 | 0 | 0 | 0 | 0 | 1 | 0 | 0 | 0 |
| 85 | 1 | 1 | 2 | 0 | 0 | 0 | 1 | 0 | 0 | 0 | 0 |
| 86 | 0 | 1 | 1 | 0 | 0 | 0 | 0 | 0 | 0 | 0 | 1 |
| 87 | 0 | 1 | 1 | 0 | 0 | 0 | 0 | 0 | 0 | 0 | 0 |
| 88 | 1 | 1 | 3 | 0 | 0 | 0 | 0 | 1 | 0 | 0 | 0 |

|     |   |   |   |   |   |   |   |   |   |   |
|-----|---|---|---|---|---|---|---|---|---|---|
| 89  | 0 | 1 | 1 | 0 | 0 | 0 | 0 | 1 | 0 | 0 |
| 90  | 0 | 1 | 3 | 0 | 0 | 0 | 0 | 0 | 1 | 0 |
| 91  | 0 | 1 | 3 | 0 | 0 | 0 | 0 | 1 | 0 | 0 |
| 92  | 0 | 1 | 1 | 0 | 0 | 0 | 0 | 0 | 0 | 0 |
| 93  | 0 | 1 | 2 | 0 | 1 | 0 | 0 | 0 | 0 | 0 |
| 94  | 1 | 1 | 3 | 0 | 0 | 0 | 0 | 1 | 0 | 0 |
| 95  | 0 | 1 | 1 | 0 | 1 | 0 | 0 | 0 | 0 | 0 |
| 96  | 1 | 1 | 2 | 0 | 0 | 0 | 0 | 1 | 0 | 0 |
| 97  | 0 | 1 | 1 | 0 | 0 | 1 | 0 | 0 | 0 | 0 |
| 98  | 0 | 1 | 1 | 0 | 0 | 0 | 0 | 1 | 0 | 0 |
| 99  | 0 | 1 | 2 | 1 | 0 | 0 | 0 | 0 | 0 | 0 |
| 100 | 0 | 1 | 3 | 0 | 0 | 0 | 0 | 1 | 0 | 0 |
| 101 | 0 | 1 | 2 | 0 | 1 | 0 | 0 | 0 | 0 | 0 |
| 102 | 0 | 1 | 1 | 1 | 0 | 0 | 0 | 0 | 0 | 0 |
| 103 | 0 | 1 | 3 | 0 | 0 | 0 | 0 | 1 | 0 | 0 |
| 104 | 1 | 1 | 3 | 0 | 0 | 0 | 1 | 0 | 0 | 0 |
| 105 | 0 | 1 | 1 | 0 | 1 | 0 | 0 | 0 | 0 | 0 |
| 106 | 0 | 1 | 1 | 0 | 0 | 0 | 0 | 1 | 0 | 0 |
| 107 | 0 | 1 | 1 | 0 | 0 | 0 | 0 | 0 | 0 | 1 |
| 108 | 1 | 1 | 3 | 0 | 0 | 0 | 0 | 0 | 1 | 0 |
| 109 | 1 | 1 | 2 | 0 | 0 | 0 | 0 | 1 | 0 | 0 |
| 110 | 0 | 1 | 1 | 0 | 0 | 0 | 0 | 1 | 0 | 0 |
| 111 | 1 | 1 | 3 | 0 | 0 | 0 | 0 | 0 | 0 | 1 |
| 112 | 0 | 1 | 1 | 0 | 0 | 0 | 0 | 0 | 0 | 1 |
| 113 | 0 | 1 | 2 | 0 | 0 | 1 | 0 | 0 | 0 | 0 |

|     |   |   |   |   |   |   |   |   |   |   |   |
|-----|---|---|---|---|---|---|---|---|---|---|---|
| 114 | 0 | 1 | 1 | 1 | 0 | 0 | 0 | 0 | 0 | 0 | 0 |
| 115 | 1 | 1 | 3 | 0 | 0 | 0 | 0 | 0 | 0 | 0 | 1 |
| 116 | 0 | 1 | 1 | 0 | 0 | 0 | 0 | 1 | 0 | 0 | 0 |
| 117 | 0 | 1 | 3 | 1 | 0 | 0 | 0 | 0 | 0 | 0 | 0 |
| 118 | 1 | 1 | 2 | 0 | 0 | 0 | 0 | 1 | 0 | 0 | 0 |
| 119 | 0 | 1 | 3 | 0 | 0 | 0 | 0 | 1 | 0 | 0 | 0 |
| 120 | 0 | 1 | 2 | 0 | 1 | 0 | 0 | 0 | 0 | 0 | 0 |
| 121 | 0 | 1 | 3 | 0 | 0 | 0 | 0 | 1 | 0 | 0 | 0 |
| 122 | 0 | 1 | 3 | 0 | 0 | 0 | 0 | 0 | 0 | 0 | 0 |
| 123 | 0 | 1 | 2 | 0 | 0 | 0 | 0 | 0 | 1 | 0 | 0 |
| 124 | 0 | 0 | 0 | 0 | 0 | 0 | 0 | 0 | 0 | 0 | 0 |
| 125 | 0 | 1 | 1 | 0 | 0 | 0 | 0 | 0 | 0 | 0 | 0 |
| 126 | 1 | 1 | 2 | 0 | 0 | 0 | 0 | 0 | 0 | 0 | 1 |
| 127 | 0 | 1 | 1 | 0 | 0 | 0 | 0 | 1 | 0 | 0 | 0 |
| 128 | 1 | 1 | 3 | 0 | 0 | 0 | 0 | 0 | 1 | 0 | 0 |
| 129 | 0 | 0 | 0 | 0 | 0 | 0 | 0 | 0 | 0 | 0 | 0 |
| 130 | 1 | 1 | 1 | 0 | 0 | 0 | 0 | 0 | 1 | 0 | 0 |
| 131 | 0 | 0 | 0 | 0 | 1 | 0 | 0 | 0 | 0 | 0 | 0 |
| 132 | 0 | 0 | 0 | 0 | 0 | 0 | 0 | 1 | 0 | 0 | 0 |
| 133 | 0 | 1 | 2 | 0 | 0 | 0 | 0 | 1 | 0 | 0 | 0 |
| 134 | 0 | 1 | 2 | 0 | 0 | 0 | 0 | 0 | 0 | 0 | 0 |
| 135 | 0 | 0 | 0 | 0 | 0 | 0 | 0 | 0 | 0 | 0 | 1 |
| 136 | 0 | 1 | 1 | 0 | 0 | 0 | 0 | 1 | 0 | 0 | 0 |
| 137 | 0 | 1 | 1 | 0 | 0 | 0 | 0 | 1 | 0 | 0 | 0 |
| 138 | 1 | 1 | 1 | 0 | 0 | 0 | 0 | 0 | 0 | 0 | 0 |



|     |   |   |   |   |   |   |   |   |   |   |   |
|-----|---|---|---|---|---|---|---|---|---|---|---|
| 164 | 0 | 1 | 1 | 1 | 0 | 0 | 0 | 0 | 0 | 0 | 0 |
| 165 | 0 | 1 | 1 | 0 | 1 | 0 | 0 | 0 | 0 | 0 | 0 |
| 166 | 0 | 0 | 0 | 0 | 1 | 0 | 0 | 0 | 0 | 0 | 0 |
| 167 | 1 | 1 | 3 | 0 | 0 | 0 | 0 | 0 | 0 | 0 | 1 |
| 168 | 0 | 1 | 1 | 0 | 0 | 0 | 0 | 1 | 0 | 0 | 0 |
| 169 | 0 | 1 | 1 | 0 | 0 | 0 | 0 | 0 | 0 | 0 | 0 |
| 170 | 0 | 0 | 0 | 0 | 0 | 0 | 0 | 0 | 0 | 0 | 0 |
| 171 | 0 | 1 | 3 | 0 | 0 | 0 | 0 | 0 | 0 | 0 | 1 |
| 172 | 0 | 0 | 0 | 1 | 0 | 0 | 0 | 0 | 0 | 0 | 0 |
| 173 | 0 | 1 | 1 | 0 | 0 | 0 | 0 | 0 | 0 | 0 | 0 |
| 174 | 0 | 0 | 0 | 0 | 0 | 0 | 0 | 0 | 1 | 0 | 0 |
| 175 | 0 | 1 | 3 | 0 | 0 | 0 | 0 | 0 | 1 | 0 | 0 |
| 176 | 1 | 1 | 2 | 0 | 0 | 0 | 0 | 1 | 0 | 0 | 0 |
| 177 | 0 | 0 | 0 | 0 | 0 | 0 | 0 | 0 | 0 | 0 | 0 |
| 178 | 0 | 1 | 2 | 0 | 0 | 0 | 0 | 0 | 0 | 0 | 0 |
| 179 | 0 | 1 | 1 | 0 | 0 | 0 | 0 | 0 | 0 | 0 | 0 |
| 180 | 0 | 0 | 0 | 1 | 0 | 0 | 0 | 0 | 0 | 0 | 0 |
| 181 | 0 | 1 | 2 | 0 | 0 | 0 | 0 | 0 | 0 | 0 | 0 |
| 182 | 0 | 0 | 0 | 0 | 0 | 0 | 0 | 1 | 0 | 0 | 0 |
| 183 | 0 | 1 | 1 | 0 | 0 | 0 | 0 | 0 | 0 | 0 | 0 |
| 184 | 0 | 0 | 0 | 0 | 0 | 0 | 0 | 0 | 0 | 0 | 0 |
| 185 | 0 | 0 | 0 | 0 | 0 | 0 | 0 | 0 | 1 | 0 | 0 |
| 186 | 0 | 0 | 0 | 0 | 0 | 0 | 0 | 0 | 0 | 0 | 0 |
| 187 | 0 | 0 | 0 | 0 | 0 | 0 | 0 | 0 | 0 | 0 | 0 |
| 188 | 1 | 1 | 3 | 0 | 0 | 0 | 0 | 1 | 0 | 0 | 0 |



|     |   |   |   |   |   |   |   |   |   |   |
|-----|---|---|---|---|---|---|---|---|---|---|
| 189 | 0 | 0 | 0 | 0 | 0 | 0 | 0 | 1 | 0 | 0 |
| 190 | 0 | 1 | 2 | 0 | 0 | 0 | 0 | 0 | 0 | 0 |
| 191 | 0 | 1 | 1 | 0 | 0 | 0 | 0 | 1 | 0 | 0 |
| 192 | 1 | 1 | 2 | 0 | 0 | 0 | 0 | 0 | 0 | 1 |
| 193 | 0 | 1 | 1 | 0 | 0 | 0 | 0 | 0 | 1 | 0 |
| 194 | 0 | 1 | 3 | 0 | 0 | 0 | 0 | 0 | 0 | 0 |
| 195 | 0 | 1 | 1 | 0 | 0 | 0 | 0 | 1 | 0 | 0 |
| 196 | 0 | 1 | 1 | 0 | 1 | 0 | 0 | 0 | 0 | 0 |
| 197 | 1 | 1 | 2 | 1 | 0 | 0 | 0 | 0 | 0 | 0 |
| 198 | 0 | 1 | 1 | 0 | 0 | 0 | 0 | 0 | 0 | 1 |
| 199 | 1 | 1 | 1 | 0 | 0 | 0 | 1 | 0 | 0 | 0 |
| 200 | 0 | 1 | 1 | 0 | 0 | 0 | 0 | 1 | 0 | 0 |
| 201 | 0 | 1 | 1 | 0 | 0 | 0 | 0 | 0 | 0 | 1 |
| 202 | 0 | 1 | 3 | 0 | 0 | 0 | 0 | 1 | 0 | 0 |
| 203 | 0 | 0 | 0 | 0 | 0 | 0 | 0 | 1 | 0 | 0 |
| 204 | 0 | 1 | 3 | 0 | 0 | 0 | 0 | 1 | 0 | 0 |
| 205 | 0 | 0 | 0 | 0 | 0 | 0 | 0 | 0 | 0 | 0 |
| 206 | 0 | 0 | 0 | 0 | 0 | 0 | 0 | 1 | 0 | 0 |
| 207 | 0 | 0 | 0 | 0 | 0 | 0 | 0 | 0 | 0 | 1 |
| 208 | 0 | 0 | 0 | 0 | 0 | 0 | 0 | 1 | 0 | 0 |
| 209 | 0 | 0 | 0 | 0 | 0 | 0 | 0 | 1 | 0 | 0 |
| 210 | 0 | 0 | 0 | 0 | 0 | 0 | 0 | 0 | 0 | 1 |
| 211 | 1 | 1 | 3 | 0 | 0 | 0 | 0 | 1 | 0 | 0 |
| 212 | 0 | 1 | 2 | 0 | 0 | 0 | 0 | 1 | 0 | 0 |
| 213 | 0 | 0 | 0 | 0 | 1 | 0 | 0 | 0 | 0 | 0 |

|     |   |   |   |   |   |   |   |   |   |   |
|-----|---|---|---|---|---|---|---|---|---|---|
| 214 | 0 | 0 | 0 | 0 | 0 | 0 | 0 | 1 | 0 | 0 |
| 215 | 0 | 0 | 0 | 0 | 0 | 0 | 0 | 0 | 0 | 1 |
| 216 | 0 | 1 | 1 | 0 | 0 | 0 | 0 | 0 | 0 | 0 |
| 217 | 0 | 0 | 0 | 0 | 0 | 0 | 0 | 0 | 0 | 1 |
| 218 | 0 | 1 | 1 | 0 | 0 | 0 | 0 | 1 | 0 | 0 |
| 219 | 1 | 1 | 2 | 0 | 0 | 0 | 0 | 1 | 0 | 0 |
| 220 | 0 | 0 | 0 | 0 | 0 | 0 | 0 | 0 | 0 | 0 |
| 221 | 0 | 1 | 2 | 0 | 0 | 0 | 1 | 0 | 0 | 0 |
| 222 | 0 | 1 | 3 | 0 | 0 | 0 | 0 | 1 | 0 | 0 |
| 223 | 0 | 1 | 1 | 0 | 0 | 0 | 1 | 0 | 0 | 0 |
| 224 | 0 | 1 | 2 | 1 | 0 | 0 | 0 | 0 | 0 | 0 |
| 225 | 1 | 1 | 3 | 0 | 0 | 0 | 0 | 1 | 0 | 0 |
| 226 | 0 | 0 | 0 | 0 | 0 | 0 | 0 | 1 | 0 | 0 |
| 227 | 0 | 0 | 0 | 0 | 0 | 0 | 0 | 0 | 1 | 0 |
| 228 | 0 | 1 | 2 | 0 | 0 | 0 | 0 | 1 | 0 | 0 |
| 229 | 0 | 0 | 0 | 0 | 0 | 0 | 0 | 0 | 0 | 0 |
| 230 | 1 | 1 | 2 | 0 | 0 | 0 | 0 | 0 | 0 | 0 |
| 231 | 0 | 1 | 1 | 0 | 0 | 0 | 0 | 0 | 0 | 0 |
| 232 | 1 | 1 | 3 | 0 | 0 | 0 | 0 | 1 | 0 | 0 |
| 233 | 1 | 1 | 1 | 0 | 0 | 0 | 0 | 0 | 0 | 1 |
| 234 | 0 | 1 | 2 | 0 | 0 | 0 | 0 | 0 | 0 | 0 |
| 235 | 0 | 1 | 1 | 0 | 0 | 0 | 0 | 0 | 0 | 0 |
| 236 | 0 | 1 | 1 | 0 | 0 | 0 | 0 | 0 | 0 | 0 |
| 237 | 1 | 1 | 3 | 0 | 0 | 0 | 0 | 0 | 0 | 0 |
| 238 | 1 | 1 | 2 | 0 | 0 | 1 | 0 | 0 | 0 | 0 |

|     |   |   |   |   |   |   |   |   |   |   |
|-----|---|---|---|---|---|---|---|---|---|---|
| 239 | 0 | 1 | 2 | 0 | 0 | 0 | 0 | 1 | 0 | 0 |
| 240 | 0 | 0 | 0 | 0 | 0 | 0 | 0 | 0 | 0 | 0 |
| 241 | 1 | 1 | 3 | 0 | 0 | 0 | 0 | 1 | 0 | 0 |
| 242 | 1 | 1 | 3 | 0 | 0 | 0 | 0 | 0 | 0 | 0 |
| 243 | 0 | 0 | 0 | 0 | 0 | 0 | 0 | 0 | 0 | 0 |
| 244 | 0 | 0 | 0 | 0 | 0 | 0 | 0 | 0 | 0 | 1 |
| 245 | 0 | 0 | 0 | 0 | 1 | 0 | 0 | 0 | 0 | 0 |
| 246 | 0 | 0 | 0 | 0 | 0 | 0 | 0 | 1 | 0 | 0 |
| 247 | 0 | 0 | 0 | 1 | 0 | 0 | 0 | 0 | 0 | 0 |
| 248 | 0 | 0 | 0 | 0 | 0 | 0 | 0 | 1 | 0 | 0 |
| 249 | 0 | 0 | 0 | 1 | 0 | 0 | 0 | 0 | 0 | 0 |
| 250 | 0 | 1 | 1 | 0 | 0 | 0 | 0 | 0 | 0 | 1 |
| 251 | 0 | 1 | 1 | 0 | 0 | 0 | 0 | 1 | 0 | 0 |
| 252 | 1 | 1 | 2 | 0 | 0 | 0 | 0 | 1 | 0 | 0 |
| 253 | 1 | 1 | 3 | 0 | 0 | 0 | 1 | 0 | 0 | 0 |
| 254 | 0 | 1 | 2 | 0 | 0 | 0 | 0 | 0 | 0 | 0 |
| 255 | 0 | 0 | 0 | 0 | 0 | 0 | 0 | 1 | 0 | 0 |
| 256 | 1 | 1 | 3 | 0 | 0 | 0 | 0 | 0 | 0 | 0 |
| 257 | 0 | 1 | 1 | 0 | 0 | 0 | 0 | 1 | 0 | 0 |
| 258 | 0 | 1 | 1 | 0 | 0 | 0 | 0 | 0 | 0 | 0 |
| 259 | 0 | 1 | 1 | 0 | 0 | 0 | 0 | 0 | 0 | 0 |
| 260 | 0 | 1 | 1 | 0 | 1 | 0 | 0 | 0 | 0 | 0 |
| 261 | 0 | 0 | 0 | 0 | 0 | 0 | 0 | 0 | 0 | 0 |
| 262 | 1 | 1 | 2 | 0 | 0 | 0 | 0 | 0 | 0 | 1 |
| 263 | 0 | 0 | 0 | 0 | 1 | 0 | 0 | 0 | 0 | 0 |

|     |   |   |   |   |   |   |   |   |   |   |
|-----|---|---|---|---|---|---|---|---|---|---|
| 264 | 1 | 1 | 3 | 0 | 0 | 0 | 0 | 1 | 0 | 0 |
| 265 | 0 | 1 | 2 | 0 | 0 | 0 | 0 | 0 | 0 | 0 |
| 266 | 0 | 1 | 2 | 0 | 0 | 0 | 0 | 1 | 0 | 0 |
| 267 | 1 | 1 | 1 | 0 | 1 | 0 | 0 | 0 | 0 | 0 |
| 268 | 0 | 0 | 0 | 0 | 0 | 0 | 0 | 1 | 0 | 0 |
| 269 | 0 | 0 | 0 | 0 | 0 | 0 | 0 | 1 | 0 | 0 |
| 270 | 0 | 1 | 1 | 0 | 0 | 0 | 0 | 1 | 0 | 0 |
| 271 | 0 | 1 | 1 | 1 | 0 | 0 | 0 | 0 | 0 | 0 |
| 272 | 1 | 1 | 3 | 0 | 0 | 0 | 0 | 0 | 0 | 0 |
| 273 | 1 | 1 | 1 | 0 | 0 | 0 | 0 | 0 | 1 | 0 |
| 274 | 0 | 1 | 1 | 0 | 0 | 0 | 0 | 0 | 0 | 1 |
| 275 | 0 | 1 | 2 | 0 | 0 | 0 | 0 | 1 | 0 | 0 |
| 276 | 0 | 1 | 2 | 1 | 0 | 0 | 0 | 0 | 0 | 0 |
| 277 | 1 | 1 | 1 | 0 | 0 | 0 | 0 | 0 | 0 | 0 |
| 278 | 0 | 1 | 1 | 0 | 0 | 0 | 0 | 0 | 0 | 0 |
| 279 | 0 | 0 | 0 | 0 | 0 | 0 | 0 | 0 | 0 | 1 |
| 280 | 0 | 0 | 0 | 0 | 0 | 0 | 0 | 1 | 0 | 0 |
| 281 | 0 | 0 | 0 | 0 | 1 | 0 | 0 | 0 | 0 | 0 |
| 282 | 1 | 1 | 1 | 0 | 1 | 0 | 0 | 0 | 0 | 0 |
| 283 | 1 | 1 | 2 | 0 | 0 | 0 | 1 | 0 | 0 | 0 |
| 284 | 0 | 0 | 0 | 0 | 0 | 1 | 0 | 0 | 0 | 0 |
| 285 | 1 | 1 | 2 | 0 | 0 | 0 | 0 | 0 | 0 | 0 |
| 286 | 0 | 0 | 0 | 0 | 0 | 0 | 0 | 0 | 0 | 0 |
| 287 | 0 | 1 | 2 | 0 | 0 | 0 | 0 | 1 | 0 | 0 |
| 288 | 1 | 1 | 2 | 0 | 1 | 0 | 0 | 0 | 0 | 0 |

|     |   |   |   |   |   |   |   |   |   |   |
|-----|---|---|---|---|---|---|---|---|---|---|
| 289 | 0 | 1 | 3 | 0 | 0 | 0 | 0 | 1 | 0 | 0 |
| 290 | 0 | 1 | 1 | 0 | 1 | 0 | 0 | 0 | 0 | 0 |
| 291 | 0 | 1 | 1 | 0 | 0 | 0 | 0 | 0 | 0 | 1 |
| 292 | 0 | 1 | 2 | 0 | 1 | 0 | 0 | 0 | 0 | 0 |
| 293 | 0 | 1 | 1 | 0 | 0 | 0 | 0 | 1 | 0 | 0 |
| 294 | 0 | 1 | 1 | 0 | 0 | 0 | 0 | 0 | 1 | 0 |
| 295 | 0 | 0 | 0 | 0 | 0 | 0 | 0 | 0 | 0 | 0 |
| 296 | 1 | 1 | 3 | 0 | 0 | 0 | 0 | 1 | 0 | 0 |
| 297 | 0 | 1 | 2 | 0 | 0 | 0 | 0 | 0 | 0 | 1 |
| 298 | 1 | 1 | 3 | 0 | 0 | 0 | 0 | 0 | 0 | 0 |
| 299 | 0 | 1 | 2 | 0 | 0 | 0 | 0 | 1 | 0 | 0 |
| 300 | 0 | 0 | 0 | 0 | 0 | 0 | 0 | 1 | 0 | 0 |
| 301 | 0 | 0 | 0 | 0 | 0 | 0 | 0 | 0 | 0 | 0 |
| 302 | 0 | 1 | 3 | 0 | 0 | 0 | 0 | 0 | 0 | 0 |
| 303 | 0 | 0 | 0 | 0 | 0 | 0 | 0 | 1 | 0 | 0 |
| 304 | 1 | 1 | 2 | 0 | 0 | 0 | 0 | 0 | 0 | 0 |
| 305 | 0 | 0 | 0 | 0 | 0 | 0 | 0 | 0 | 0 | 0 |
| 306 | 0 | 0 | 0 | 0 | 1 | 0 | 0 | 0 | 0 | 0 |
| 307 | 0 | 0 | 0 | 0 | 0 | 0 | 0 | 1 | 0 | 0 |
| 308 | 0 | 0 | 0 | 0 | 0 | 1 | 0 | 0 | 0 | 0 |
| 309 | 0 | 0 | 0 | 0 | 0 | 0 | 0 | 1 | 0 | 0 |
| 310 | 0 | 0 | 0 | 0 | 0 | 0 | 0 | 0 | 0 | 1 |
| 311 | 0 | 1 | 1 | 0 | 0 | 0 | 0 | 1 | 0 | 0 |
| 312 | 0 | 1 | 3 | 0 | 0 | 0 | 0 | 1 | 0 | 0 |
| 313 | 1 | 1 | 3 | 0 | 0 | 0 | 0 | 0 | 1 | 0 |









|     |   |   |   |   |   |   |   |   |   |   |   |
|-----|---|---|---|---|---|---|---|---|---|---|---|
| 389 | 0 | 0 | 0 | 0 | 0 | 0 | 0 | 0 | 0 | 0 | 0 |
| 390 | 0 | 1 | 1 | 0 | 0 | 0 | 0 | 0 | 0 | 0 | 0 |
| 391 | 0 | 0 | 0 | 0 | 0 | 0 | 0 | 1 | 0 | 0 | 0 |
| 392 | 0 | 0 | 0 | 1 | 0 | 0 | 0 | 0 | 0 | 0 | 0 |
| 393 | 0 | 0 | 0 | 0 | 0 | 0 | 0 | 1 | 0 | 0 | 0 |
| 394 | 0 | 0 | 0 | 0 | 0 | 0 | 0 | 1 | 0 | 0 | 0 |
| 395 | 0 | 1 | 2 | 0 | 0 | 0 | 0 | 0 | 0 | 0 | 0 |
| 396 | 0 | 1 | 1 | 0 | 0 | 0 | 0 | 0 | 0 | 0 | 0 |
| 397 | 0 | 0 | 0 | 0 | 0 | 0 | 0 | 0 | 0 | 0 | 0 |
| 398 | 1 | 1 | 2 | 0 | 0 | 0 | 0 | 1 | 0 | 0 | 0 |
| 399 | 0 | 0 | 0 | 1 | 0 | 0 | 0 | 0 | 0 | 0 | 0 |
| 400 | 1 | 1 | 3 | 0 | 0 | 0 | 0 | 1 | 0 | 0 | 0 |
| 401 | 0 | 0 | 0 | 1 | 0 | 0 | 0 | 0 | 0 | 0 | 0 |
| 402 | 0 | 1 | 1 | 0 | 0 | 0 | 0 | 0 | 1 | 0 | 0 |
| 403 | 0 | 0 | 0 | 0 | 0 | 0 | 0 | 1 | 0 | 0 | 0 |
| 404 | 0 | 0 | 0 | 1 | 0 | 0 | 0 | 0 | 0 | 0 | 0 |
| 405 | 0 | 0 | 0 | 1 | 0 | 0 | 0 | 0 | 0 | 0 | 0 |
| 406 | 0 | 0 | 0 | 0 | 0 | 0 | 0 | 1 | 0 | 0 | 0 |
| 407 | 0 | 0 | 0 | 0 | 0 | 0 | 0 | 0 | 0 | 0 | 0 |
| 408 | 0 | 0 | 0 | 0 | 0 | 0 | 0 | 1 | 0 | 0 | 0 |
| 409 | 0 | 0 | 0 | 0 | 0 | 0 | 0 | 0 | 0 | 0 | 0 |
| 410 | 0 | 1 | 2 | 0 | 0 | 0 | 0 | 1 | 0 | 0 | 0 |
| 411 | 0 | 0 | 0 | 0 | 0 | 0 | 0 | 1 | 0 | 0 | 0 |
| 412 | 0 | 0 | 0 | 0 | 0 | 0 | 0 | 0 | 0 | 0 | 0 |
| 413 | 0 | 0 | 0 | 0 | 0 | 0 | 0 | 1 | 0 | 0 | 0 |

|     |   |   |   |   |   |   |   |   |   |   |   |
|-----|---|---|---|---|---|---|---|---|---|---|---|
| 414 | 0 | 0 | 0 | 0 | 0 | 0 | 0 | 0 | 0 | 0 | 1 |
| 415 | 0 | 0 | 0 | 0 | 1 | 0 | 0 | 0 | 0 | 0 | 0 |
| 416 | 0 | 0 | 0 | 0 | 1 | 0 | 0 | 0 | 0 | 0 | 0 |
| 417 | 0 | 0 | 0 | 1 | 0 | 0 | 0 | 0 | 0 | 0 | 0 |
| 418 | 0 | 0 | 0 | 0 | 0 | 0 | 0 | 0 | 0 | 0 | 1 |
| 419 | 0 | 0 | 0 | 0 | 0 | 1 | 0 | 0 | 0 | 0 | 0 |
| 420 | 0 | 1 | 2 | 0 | 0 | 0 | 0 | 0 | 1 | 0 | 0 |
| 421 | 0 | 1 | 1 | 0 | 0 | 1 | 0 | 0 | 0 | 0 | 0 |
| 422 | 0 | 1 | 1 | 0 | 0 | 0 | 0 | 0 | 0 | 0 | 0 |
| 423 | 0 | 0 | 0 | 0 | 0 | 0 | 0 | 0 | 0 | 0 | 0 |
| 424 | 0 | 0 | 0 | 0 | 0 | 0 | 0 | 1 | 0 | 0 | 0 |
| 425 | 0 | 0 | 0 | 0 | 0 | 0 | 0 | 0 | 0 | 0 | 0 |
| 426 | 0 | 0 | 0 | 1 | 0 | 0 | 0 | 0 | 0 | 0 | 0 |
| 427 | 0 | 0 | 0 | 0 | 0 | 0 | 0 | 0 | 0 | 0 | 0 |
| 428 | 0 | 0 | 0 | 0 | 0 | 0 | 0 | 1 | 0 | 0 | 0 |
| 429 | 0 | 0 | 0 | 0 | 1 | 0 | 0 | 0 | 0 | 0 | 0 |
| 430 | 0 | 0 | 0 | 0 | 0 | 1 | 0 | 0 | 0 | 0 | 0 |
| 431 | 0 | 0 | 0 | 0 | 0 | 0 | 0 | 0 | 0 | 0 | 0 |
| 432 | 0 | 0 | 0 | 0 | 0 | 0 | 0 | 0 | 0 | 0 | 0 |
| 433 | 0 | 1 | 1 | 0 | 0 | 0 | 0 | 0 | 0 | 0 | 0 |
| 434 | 0 | 0 | 0 | 0 | 0 | 0 | 0 | 1 | 0 | 0 | 0 |
| 435 | 0 | 0 | 0 | 1 | 0 | 0 | 0 | 0 | 0 | 0 | 0 |
| 436 | 0 | 0 | 0 | 0 | 0 | 0 | 0 | 1 | 0 | 0 | 0 |
| 437 | 0 | 0 | 0 | 0 | 0 | 0 | 0 | 1 | 0 | 0 | 0 |
| 438 | 0 | 0 | 0 | 0 | 1 | 0 | 0 | 0 | 0 | 0 | 0 |

|     |   |   |   |   |   |   |   |   |   |   |
|-----|---|---|---|---|---|---|---|---|---|---|
| 439 | 0 | 0 | 0 | 0 | 0 | 0 | 0 | 1 | 0 | 0 |
| 440 | 0 | 0 | 0 | 0 | 0 | 0 | 0 | 0 | 0 | 0 |
| 441 | 0 | 0 | 0 | 0 | 0 | 0 | 0 | 1 | 0 | 0 |
| 442 | 0 | 0 | 0 | 0 | 0 | 0 | 0 | 1 | 0 | 0 |
| 443 | 0 | 0 | 0 | 0 | 0 | 0 | 0 | 0 | 0 | 1 |
| 444 | 1 | 1 | 3 | 0 | 0 | 0 | 0 | 1 | 0 | 0 |
| 445 | 0 | 0 | 0 | 0 | 0 | 0 | 0 | 0 | 0 | 0 |
| 446 | 0 | 0 | 0 | 0 | 0 | 0 | 0 | 0 | 0 | 0 |
| 447 | 0 | 0 | 0 | 0 | 0 | 0 | 1 | 0 | 0 | 0 |
| 448 | 0 | 0 | 0 | 0 | 1 | 0 | 0 | 0 | 0 | 0 |
| 449 | 0 | 1 | 2 | 0 | 0 | 0 | 0 | 1 | 0 | 0 |
| 450 | 0 | 0 | 0 | 0 | 0 | 0 | 0 | 0 | 0 | 1 |
| 451 | 0 | 0 | 0 | 0 | 0 | 0 | 0 | 0 | 0 | 1 |
| 452 | 1 | 1 | 1 | 0 | 0 | 0 | 0 | 0 | 0 | 1 |
| 453 | 0 | 0 | 0 | 0 | 0 | 0 | 0 | 0 | 0 | 0 |
| 454 | 0 | 0 | 0 | 0 | 0 | 0 | 1 | 0 | 0 | 0 |
| 455 | 0 | 1 | 2 | 0 | 0 | 0 | 0 | 0 | 0 | 0 |
| 456 | 0 | 1 | 1 | 0 | 0 | 1 | 0 | 0 | 0 | 0 |
| 457 | 0 | 0 | 0 | 0 | 0 | 0 | 0 | 0 | 1 | 0 |
| 458 | 0 | 0 | 0 | 0 | 0 | 0 | 1 | 0 | 0 | 0 |
| 459 | 0 | 1 | 1 | 0 | 0 | 0 | 0 | 1 | 0 | 0 |
| 460 | 1 | 1 | 3 | 0 | 0 | 0 | 0 | 0 | 1 | 0 |
| 461 | 0 | 0 | 0 | 0 | 0 | 0 | 0 | 1 | 0 | 0 |
| 462 | 0 | 0 | 0 | 1 | 0 | 0 | 0 | 0 | 0 | 0 |
| 463 | 0 | 1 | 2 | 0 | 0 | 0 | 0 | 1 | 0 | 0 |

|     |   |   |   |   |   |   |   |   |   |   |   |
|-----|---|---|---|---|---|---|---|---|---|---|---|
| 464 | 0 | 0 | 0 | 0 | 0 | 0 | 0 | 0 | 0 | 0 | 0 |
| 465 | 0 | 0 | 0 | 0 | 1 | 0 | 0 | 0 | 0 | 0 | 0 |
| 466 | 0 | 0 | 0 | 0 | 1 | 0 | 0 | 0 | 0 | 0 | 0 |
| 467 | 0 | 1 | 1 | 0 | 0 | 0 | 0 | 0 | 0 | 0 | 0 |
| 468 | 0 | 0 | 0 | 0 | 0 | 0 | 0 | 0 | 0 | 0 | 0 |
| 469 | 1 | 1 | 3 | 1 | 0 | 0 | 0 | 0 | 0 | 0 | 0 |
| 470 | 0 | 0 | 0 | 0 | 0 | 0 | 0 | 0 | 0 | 0 | 0 |
| 471 | 1 | 1 | 3 | 0 | 0 | 0 | 0 | 1 | 0 | 0 | 0 |
| 472 | 0 | 0 | 0 | 0 | 0 | 0 | 0 | 0 | 0 | 0 | 0 |
| 473 | 0 | 1 | 2 | 0 | 0 | 0 | 0 | 0 | 0 | 0 | 0 |
| 474 | 0 | 0 | 0 | 0 | 0 | 0 | 0 | 1 | 0 | 0 | 0 |
| 475 | 0 | 1 | 1 | 0 | 0 | 0 | 0 | 1 | 0 | 0 | 0 |
| 476 | 0 | 1 | 1 | 0 | 0 | 1 | 0 | 0 | 0 | 0 | 0 |
| 477 | 0 | 1 | 1 | 0 | 0 | 0 | 0 | 0 | 1 | 0 | 0 |
| 478 | 1 | 1 | 1 | 0 | 1 | 0 | 0 | 0 | 0 | 0 | 0 |
| 479 | 0 | 1 | 1 | 1 | 0 | 0 | 0 | 0 | 0 | 0 | 0 |
| 480 | 0 | 1 | 3 | 0 | 1 | 0 | 0 | 0 | 0 | 0 | 0 |
| 481 | 0 | 1 | 1 | 0 | 0 | 0 | 0 | 1 | 0 | 0 | 0 |
| 482 | 0 | 1 | 1 | 0 | 0 | 0 | 0 | 0 | 0 | 0 | 1 |
| 483 | 0 | 1 | 2 | 0 | 0 | 0 | 0 | 0 | 0 | 0 | 0 |
| 484 | 0 | 1 | 2 | 0 | 0 | 0 | 0 | 0 | 0 | 0 | 1 |
| 485 | 0 | 1 | 1 | 0 | 0 | 0 | 0 | 0 | 0 | 0 | 0 |
| 486 | 1 | 1 | 1 | 0 | 0 | 0 | 0 | 0 | 0 | 0 | 0 |
| 487 | 0 | 0 | 0 | 0 | 0 | 0 | 0 | 0 | 0 | 0 | 0 |
| 488 | 1 | 1 | 2 | 0 | 0 | 0 | 0 | 0 | 0 | 0 | 1 |



|     |   |   |   |   |   |   |   |   |   |   |   |
|-----|---|---|---|---|---|---|---|---|---|---|---|
| 514 | 0 | 0 | 0 | 0 | 0 | 0 | 0 | 0 | 0 | 0 | 1 |
| 515 | 0 | 1 | 2 | 0 | 0 | 0 | 0 | 1 | 0 | 0 | 0 |
| 516 | 0 | 0 | 0 | 0 | 0 | 0 | 0 | 1 | 0 | 0 | 0 |
| 517 | 0 | 0 | 0 | 0 | 0 | 0 | 0 | 0 | 0 | 0 | 0 |
| 518 | 0 | 0 | 0 | 0 | 0 | 0 | 0 | 1 | 0 | 0 | 0 |
| 519 | 0 | 0 | 0 | 0 | 0 | 0 | 0 | 0 | 0 | 0 | 0 |
| 520 | 0 | 0 | 0 | 0 | 0 | 0 | 0 | 0 | 0 | 0 | 0 |
| 521 | 0 | 0 | 0 | 0 | 0 | 0 | 0 | 0 | 0 | 0 | 1 |
| 522 | 0 | 1 | 1 | 0 | 0 | 0 | 0 | 1 | 0 | 0 | 0 |
| 523 | 0 | 0 | 0 | 0 | 0 | 0 | 1 | 0 | 0 | 0 | 0 |
| 524 | 0 | 1 | 2 | 0 | 0 | 0 | 0 | 1 | 0 | 0 | 0 |
| 525 | 0 | 0 | 0 | 0 | 0 | 0 | 0 | 0 | 0 | 0 | 0 |
| 526 | 1 | 1 | 3 | 0 | 0 | 0 | 0 | 0 | 0 | 0 | 0 |
| 527 | 0 | 0 | 0 | 0 | 0 | 0 | 0 | 0 | 0 | 0 | 0 |
| 528 | 0 | 0 | 0 | 0 | 0 | 1 | 0 | 0 | 0 | 0 | 0 |
| 529 | 0 | 0 | 0 | 0 | 0 | 1 | 0 | 0 | 0 | 0 | 0 |
| 530 | 0 | 0 | 0 | 0 | 1 | 0 | 0 | 0 | 0 | 0 | 0 |
| 531 | 0 | 1 | 1 | 0 | 0 | 0 | 0 | 0 | 0 | 0 | 0 |
| 532 | 0 | 0 | 0 | 1 | 0 | 0 | 0 | 0 | 0 | 0 | 0 |
| 533 | 0 | 0 | 0 | 0 | 0 | 0 | 0 | 1 | 0 | 0 | 0 |
| 534 | 0 | 1 | 1 | 0 | 0 | 0 | 0 | 1 | 0 | 0 | 0 |
| 535 | 0 | 0 | 0 | 0 | 0 | 0 | 0 | 0 | 0 | 0 | 0 |
| 536 | 0 | 0 | 0 | 0 | 0 | 0 | 0 | 0 | 1 | 0 | 0 |
| 537 | 0 | 0 | 0 | 0 | 0 | 0 | 0 | 0 | 0 | 0 | 0 |
| 538 | 0 | 1 | 3 | 0 | 0 | 0 | 0 | 0 | 1 | 0 | 0 |

|     |   |   |   |   |   |   |   |   |   |   |   |
|-----|---|---|---|---|---|---|---|---|---|---|---|
| 539 | 1 | 1 | 2 | 1 | 0 | 0 | 0 | 0 | 0 | 0 | 0 |
| 540 | 0 | 0 | 0 | 0 | 0 | 0 | 0 | 0 | 0 | 1 | 0 |
| 541 | 0 | 1 | 2 | 0 | 0 | 0 | 0 | 0 | 1 | 0 | 0 |
| 542 | 0 | 0 | 0 | 0 | 0 | 0 | 0 | 0 | 0 | 0 | 0 |
| 543 | 0 | 0 | 0 | 0 | 0 | 0 | 0 | 0 | 1 | 0 | 0 |
| 544 | 0 | 0 | 0 | 0 | 0 | 0 | 0 | 0 | 0 | 0 | 0 |
| 545 | 0 | 0 | 0 | 0 | 0 | 0 | 0 | 0 | 1 | 0 | 0 |
| 546 | 0 | 0 | 0 | 0 | 1 | 0 | 0 | 0 | 0 | 0 | 0 |
| 547 | 0 | 1 | 3 | 0 | 0 | 0 | 0 | 0 | 0 | 0 | 0 |
| 548 | 0 | 0 | 0 | 1 | 0 | 0 | 0 | 0 | 0 | 0 | 0 |
| 549 | 0 | 1 | 1 | 0 | 0 | 0 | 0 | 0 | 1 | 0 | 0 |
| 550 | 0 | 1 | 1 | 0 | 0 | 0 | 0 | 0 | 0 | 1 | 0 |
| 551 | 0 | 0 | 0 | 0 | 0 | 0 | 0 | 0 | 1 | 0 | 0 |
| 552 | 0 | 1 | 3 | 0 | 1 | 0 | 0 | 0 | 0 | 0 | 0 |
| 553 | 0 | 1 | 2 | 0 | 0 | 0 | 0 | 0 | 1 | 0 | 0 |
| 554 | 0 | 0 | 0 | 0 | 0 | 0 | 0 | 0 | 1 | 0 | 0 |
| 555 | 0 | 1 | 2 | 1 | 0 | 0 | 0 | 0 | 0 | 0 | 0 |
| 556 | 0 | 0 | 0 | 0 | 0 | 0 | 0 | 0 | 1 | 0 | 0 |
| 557 | 1 | 1 | 1 | 0 | 0 | 1 | 0 | 0 | 0 | 0 | 0 |
| 558 | 1 | 1 | 2 | 0 | 0 | 0 | 0 | 0 | 0 | 0 | 1 |
| 559 | 0 | 1 | 2 | 1 | 0 | 0 | 0 | 0 | 0 | 0 | 0 |
| 560 | 0 | 1 | 2 | 0 | 0 | 0 | 0 | 0 | 0 | 1 | 0 |
| 561 | 0 | 1 | 1 | 0 | 0 | 0 | 0 | 0 | 0 | 0 | 1 |
| 562 | 0 | 0 | 0 | 0 | 0 | 0 | 0 | 0 | 1 | 0 | 0 |
| 563 | 1 | 1 | 1 | 0 | 1 | 0 | 0 | 0 | 0 | 0 | 0 |

|     |   |   |   |   |   |   |   |   |   |   |   |
|-----|---|---|---|---|---|---|---|---|---|---|---|
| 564 | 0 | 0 | 0 | 1 | 0 | 0 | 0 | 0 | 0 | 0 | 0 |
| 565 | 0 | 1 | 1 | 0 | 0 | 1 | 0 | 0 | 0 | 0 | 0 |
| 566 | 0 | 1 | 1 | 0 | 1 | 0 | 0 | 0 | 0 | 0 | 0 |
| 567 | 0 | 1 | 2 | 0 | 0 | 0 | 0 | 0 | 1 | 0 | 0 |
| 568 | 0 | 1 | 1 | 0 | 0 | 0 | 0 | 0 | 1 | 0 | 0 |
| 569 | 0 | 1 | 2 | 0 | 0 | 0 | 0 | 0 | 0 | 0 | 0 |
| 570 | 0 | 0 | 0 | 1 | 0 | 0 | 0 | 0 | 0 | 0 | 0 |
| 571 | 0 | 0 | 0 | 0 | 0 | 0 | 0 | 0 | 0 | 0 | 0 |
| 572 | 1 | 1 | 3 | 0 | 0 | 0 | 0 | 1 | 0 | 0 | 0 |
| 573 | 0 | 1 | 1 | 0 | 1 | 0 | 0 | 0 | 0 | 0 | 0 |
| 574 | 0 | 1 | 1 | 0 | 0 | 0 | 0 | 1 | 0 | 0 | 0 |
| 575 | 0 | 1 | 2 | 0 | 0 | 0 | 0 | 0 | 0 | 0 | 0 |
| 576 | 0 | 1 | 1 | 0 | 0 | 0 | 0 | 0 | 0 | 0 | 1 |
| 577 | 0 | 0 | 0 | 0 | 0 | 0 | 0 | 1 | 0 | 0 | 0 |
| 578 | 0 | 1 | 1 | 0 | 0 | 0 | 1 | 0 | 0 | 0 | 0 |
| 579 | 0 | 1 | 1 | 0 | 0 | 0 | 0 | 1 | 0 | 0 | 0 |
| 580 | 0 | 1 | 2 | 0 | 0 | 0 | 0 | 0 | 0 | 0 | 1 |
| 581 | 0 | 1 | 2 | 0 | 0 | 0 | 0 | 0 | 0 | 0 | 0 |
| 582 | 0 | 1 | 1 | 0 | 0 | 0 | 0 | 1 | 0 | 0 | 0 |
| 583 | 0 | 1 | 1 | 0 | 0 | 0 | 0 | 1 | 0 | 0 | 0 |
| 584 | 0 | 1 | 2 | 0 | 0 | 0 | 0 | 1 | 0 | 0 | 0 |
| 585 | 0 | 1 | 1 | 0 | 0 | 0 | 0 | 1 | 0 | 0 | 0 |
| 586 | 0 | 0 | 0 | 1 | 0 | 0 | 0 | 0 | 0 | 0 | 0 |
| 587 | 0 | 1 | 1 | 0 | 0 | 0 | 0 | 0 | 0 | 0 | 0 |
| 588 | 0 | 0 | 0 | 0 | 1 | 0 | 0 | 0 | 0 | 0 | 0 |



|     |   |   |   |   |   |   |   |   |   |   |   |
|-----|---|---|---|---|---|---|---|---|---|---|---|
| 589 | 0 | 1 | 1 | 0 | 0 | 0 | 0 | 0 | 0 | 0 | 0 |
| 590 | 0 | 0 | 0 | 0 | 0 | 0 | 0 | 0 | 0 | 0 | 0 |
| 591 | 0 | 0 | 0 | 0 | 0 | 0 | 0 | 0 | 0 | 0 | 0 |
| 592 | 0 | 0 | 0 | 0 | 0 | 0 | 0 | 0 | 0 | 0 | 1 |
| 593 | 1 | 1 | 2 | 0 | 0 | 0 | 0 | 0 | 0 | 0 | 1 |
| 594 | 1 | 1 | 2 | 0 | 1 | 0 | 0 | 0 | 0 | 0 | 0 |
| 595 | 0 | 1 | 2 | 0 | 0 | 0 | 0 | 0 | 0 | 0 | 0 |
| 596 | 0 | 1 | 1 | 0 | 0 | 0 | 0 | 1 | 0 | 0 | 0 |
| 597 | 0 | 1 | 1 | 0 | 0 | 0 | 0 | 0 | 0 | 0 | 0 |
| 598 | 1 | 1 | 1 | 0 | 0 | 0 | 0 | 0 | 0 | 0 | 1 |
| 599 | 0 | 0 | 0 | 0 | 0 | 0 | 0 | 0 | 0 | 0 | 0 |
| 600 | 0 | 0 | 0 | 0 | 0 | 0 | 0 | 0 | 0 | 0 | 0 |
| 601 | 0 | 0 | 0 | 0 | 0 | 0 | 0 | 1 | 0 | 0 | 0 |
| 602 | 0 | 0 | 0 | 0 | 0 | 0 | 0 | 0 | 1 | 0 | 0 |
| 603 | 0 | 0 | 0 | 0 | 0 | 0 | 0 | 1 | 0 | 0 | 0 |
| 604 | 0 | 0 | 0 | 0 | 0 | 0 | 0 | 0 | 0 | 0 | 0 |
| 605 | 0 | 0 | 0 | 0 | 0 | 0 | 0 | 0 | 0 | 0 | 0 |
| 606 | 0 | 1 | 2 | 0 | 1 | 0 | 0 | 0 | 0 | 0 | 0 |
| 607 | 0 | 1 | 2 | 0 | 0 | 0 | 0 | 1 | 0 | 0 | 0 |
| 608 | 0 | 1 | 2 | 0 | 0 | 1 | 0 | 0 | 0 | 0 | 0 |
| 609 | 0 | 0 | 0 | 0 | 0 | 0 | 0 | 0 | 0 | 0 | 0 |
| 610 | 0 | 1 | 1 | 0 | 0 | 0 | 0 | 0 | 0 | 0 | 0 |
| 611 | 0 | 1 | 1 | 0 | 0 | 0 | 0 | 1 | 0 | 0 | 0 |
| 612 | 0 | 1 | 1 | 0 | 0 | 0 | 0 | 1 | 0 | 0 | 0 |
| 613 | 0 | 1 | 1 | 0 | 0 | 0 | 0 | 0 | 0 | 0 | 0 |

|     |   |   |   |   |   |   |   |   |   |   |   |
|-----|---|---|---|---|---|---|---|---|---|---|---|
| 614 | 0 | 1 | 1 | 0 | 0 | 0 | 0 | 0 | 0 | 0 | 0 |
| 615 | 0 | 0 | 0 | 0 | 0 | 0 | 0 | 0 | 0 | 0 | 1 |
| 616 | 0 | 1 | 1 | 0 | 0 | 0 | 0 | 1 | 0 | 0 | 0 |
| 617 | 0 | 0 | 0 | 0 | 0 | 0 | 0 | 0 | 0 | 0 | 0 |
| 618 | 0 | 1 | 1 | 0 | 0 | 0 | 0 | 1 | 0 | 0 | 0 |
| 619 | 0 | 1 | 1 | 0 | 0 | 0 | 0 | 1 | 0 | 0 | 0 |
| 620 | 0 | 0 | 0 | 0 | 0 | 0 | 0 | 0 | 0 | 0 | 0 |
| 621 | 0 | 0 | 0 | 0 | 0 | 0 | 0 | 1 | 0 | 0 | 0 |
| 622 | 0 | 1 | 1 | 0 | 0 | 0 | 0 | 0 | 0 | 0 | 0 |
| 623 | 0 | 1 | 1 | 0 | 0 | 0 | 0 | 0 | 0 | 0 | 1 |
| 624 | 0 | 1 | 1 | 0 | 0 | 0 | 0 | 0 | 0 | 0 | 1 |
| 625 | 0 | 1 | 1 | 0 | 0 | 0 | 0 | 1 | 0 | 0 | 0 |
| 626 | 0 | 0 | 0 | 0 | 0 | 0 | 0 | 1 | 0 | 0 | 0 |
| 627 | 0 | 0 | 0 | 0 | 0 | 0 | 0 | 1 | 0 | 0 | 0 |
| 628 | 0 | 0 | 0 | 0 | 0 | 0 | 0 | 0 | 1 | 0 | 0 |
| 629 | 0 | 0 | 0 | 1 | 0 | 0 | 0 | 0 | 0 | 0 | 0 |
| 630 | 0 | 0 | 0 | 1 | 0 | 0 | 0 | 0 | 0 | 0 | 0 |
| 631 | 0 | 0 | 0 | 0 | 0 | 0 | 0 | 0 | 0 | 0 | 1 |
| 632 | 0 | 0 | 0 | 0 | 0 | 0 | 0 | 0 | 0 | 0 | 0 |
| 633 | 0 | 0 | 0 | 0 | 0 | 0 | 0 | 1 | 0 | 0 | 0 |
| 634 | 0 | 0 | 0 | 1 | 0 | 0 | 0 | 0 | 0 | 0 | 0 |
| 635 | 1 | 1 | 2 | 0 | 0 | 0 | 0 | 0 | 0 | 0 | 0 |
| 636 | 0 | 1 | 2 | 0 | 0 | 0 | 0 | 0 | 0 | 0 | 0 |
| 637 | 0 | 1 | 2 | 0 | 0 | 0 | 0 | 1 | 0 | 0 | 0 |
| 638 | 0 | 1 | 2 | 0 | 0 | 0 | 0 | 0 | 0 | 0 | 1 |



|     |   |   |   |   |   |   |   |   |   |   |   |
|-----|---|---|---|---|---|---|---|---|---|---|---|
| 664 | 0 | 1 | 1 | 0 | 0 | 0 | 0 | 0 | 0 | 0 | 0 |
| 665 | 0 | 0 | 0 | 0 | 0 | 0 | 1 | 0 | 0 | 0 | 0 |
| 666 | 0 | 0 | 0 | 0 | 0 | 0 | 0 | 0 | 0 | 0 | 0 |
| 667 | 0 | 1 | 2 | 0 | 0 | 0 | 0 | 0 | 0 | 0 | 0 |
| 668 | 0 | 1 | 3 | 0 | 0 | 0 | 0 | 1 | 0 | 0 | 0 |
| 669 | 0 | 0 | 0 | 0 | 0 | 0 | 0 | 1 | 0 | 0 | 0 |
| 670 | 1 | 1 | 2 | 0 | 0 | 0 | 0 | 0 | 0 | 0 | 1 |
| 671 | 0 | 0 | 0 | 1 | 0 | 0 | 0 | 0 | 0 | 0 | 0 |
| 672 | 0 | 0 | 0 | 0 | 0 | 0 | 0 | 0 | 0 | 0 | 0 |
| 673 | 0 | 0 | 0 | 1 | 0 | 0 | 0 | 0 | 0 | 0 | 0 |
| 674 | 0 | 0 | 0 | 0 | 0 | 0 | 0 | 0 | 0 | 0 | 0 |
| 675 | 1 | 1 | 1 | 0 | 0 | 0 | 0 | 0 | 0 | 0 | 1 |
| 676 | 0 | 0 | 0 | 0 | 0 | 0 | 0 | 0 | 0 | 0 | 0 |
| 677 | 1 | 1 | 2 | 0 | 0 | 0 | 0 | 0 | 0 | 0 | 1 |
| 678 | 0 | 0 | 0 | 0 | 0 | 0 | 0 | 1 | 0 | 0 | 0 |
| 679 | 0 | 1 | 1 | 0 | 0 | 0 | 0 | 0 | 0 | 0 | 1 |
| 680 | 0 | 0 | 0 | 0 | 0 | 0 | 0 | 0 | 0 | 0 | 0 |
| 681 | 0 | 0 | 0 | 0 | 0 | 0 | 0 | 1 | 0 | 0 | 0 |
| 682 | 1 | 1 | 1 | 0 | 0 | 0 | 0 | 0 | 0 | 0 | 1 |
| 683 | 0 | 0 | 0 | 0 | 0 | 0 | 0 | 1 | 0 | 0 | 0 |
| 684 | 0 | 1 | 1 | 0 | 0 | 0 | 0 | 1 | 0 | 0 | 0 |
| 685 | 0 | 0 | 0 | 0 | 0 | 0 | 0 | 1 | 0 | 0 | 0 |
| 686 | 0 | 0 | 0 | 0 | 0 | 0 | 0 | 1 | 0 | 0 | 0 |
| 687 | 0 | 0 | 0 | 0 | 0 | 0 | 0 | 0 | 0 | 0 | 0 |
| 688 | 0 | 1 | 2 | 0 | 0 | 0 | 0 | 0 | 1 | 0 | 0 |

|     |   |   |   |   |   |   |   |   |   |   |
|-----|---|---|---|---|---|---|---|---|---|---|
| 689 | 0 | 0 | 0 | 0 | 0 | 0 | 0 | 1 | 0 | 0 |
| 690 | 0 | 0 | 0 | 0 | 0 | 0 | 0 | 0 | 0 | 0 |
| 691 | 1 | 1 | 3 | 0 | 0 | 0 | 0 | 0 | 0 | 1 |
| 692 | 0 | 0 | 0 | 0 | 0 | 0 | 0 | 0 | 0 | 0 |
| 693 | 0 | 0 | 0 | 0 | 0 | 0 | 0 | 0 | 0 | 0 |
| 694 | 0 | 0 | 0 | 0 | 1 | 0 | 0 | 0 | 0 | 0 |
| 695 | 0 | 1 | 3 | 0 | 0 | 0 | 0 | 1 | 0 | 0 |
| 696 | 0 | 0 | 0 | 0 | 0 | 0 | 0 | 0 | 0 | 0 |
| 697 | 0 | 0 | 0 | 0 | 0 | 0 | 0 | 1 | 0 | 0 |
| 698 | 0 | 1 | 2 | 0 | 0 | 0 | 0 | 1 | 0 | 0 |
| 699 | 1 | 1 | 3 | 0 | 0 | 0 | 0 | 0 | 0 | 0 |
| 700 | 0 | 1 | 3 | 1 | 0 | 0 | 0 | 0 | 0 | 0 |
| 701 | 0 | 0 | 0 | 0 | 0 | 0 | 0 | 1 | 0 | 0 |
| 702 | 0 | 0 | 0 | 0 | 0 | 0 | 0 | 0 | 0 | 0 |
| 703 | 1 | 1 | 2 | 0 | 0 | 0 | 0 | 0 | 0 | 1 |
| 704 | 0 | 0 | 0 | 0 | 0 | 0 | 0 | 0 | 0 | 0 |
| 705 | 0 | 0 | 0 | 1 | 0 | 0 | 0 | 0 | 0 | 0 |
| 706 | 0 | 0 | 0 | 1 | 0 | 0 | 0 | 0 | 0 | 0 |
| 707 | 0 | 0 | 0 | 0 | 0 | 1 | 0 | 0 | 0 | 0 |
| 708 | 0 | 0 | 0 | 0 | 0 | 0 | 0 | 1 | 0 | 0 |
| 709 | 0 | 0 | 0 | 0 | 0 | 1 | 0 | 0 | 0 | 0 |
| 710 | 0 | 0 | 0 | 0 | 0 | 0 | 0 | 1 | 0 | 0 |
| 711 | 0 | 0 | 0 | 0 | 0 | 0 | 0 | 1 | 0 | 0 |
| 712 | 0 | 1 | 3 | 0 | 0 | 0 | 0 | 1 | 0 | 0 |
| 713 | 1 | 1 | 2 | 0 | 0 | 0 | 0 | 1 | 0 | 0 |

|     |   |   |   |   |   |   |   |   |   |   |   |
|-----|---|---|---|---|---|---|---|---|---|---|---|
| 714 | 0 | 0 | 0 | 0 | 0 | 0 | 0 | 0 | 0 | 0 | 0 |
| 715 | 0 | 0 | 0 | 0 | 0 | 0 | 0 | 0 | 0 | 0 | 0 |
| 716 | 0 | 1 | 1 | 0 | 0 | 0 | 1 | 0 | 0 | 0 | 0 |
| 717 | 0 | 0 | 0 | 0 | 0 | 0 | 0 | 1 | 0 | 0 | 0 |
| 718 | 0 | 1 | 2 | 0 | 0 | 0 | 0 | 1 | 0 | 0 | 0 |
| 719 | 0 | 0 | 0 | 0 | 0 | 0 | 0 | 0 | 0 | 0 | 0 |
| 720 | 1 | 1 | 1 | 0 | 0 | 0 | 0 | 1 | 0 | 0 | 0 |
| 721 | 0 | 0 | 0 | 0 | 0 | 0 | 0 | 0 | 0 | 0 | 0 |
| 722 | 1 | 1 | 3 | 0 | 0 | 1 | 0 | 0 | 0 | 0 | 0 |
| 723 | 0 | 0 | 0 | 0 | 0 | 0 | 1 | 0 | 0 | 0 | 0 |
| 724 | 0 | 0 | 0 | 0 | 0 | 0 | 0 | 1 | 0 | 0 | 0 |
| 725 | 0 | 0 | 0 | 0 | 0 | 0 | 0 | 0 | 0 | 0 | 1 |
| 726 | 0 | 1 | 2 | 0 | 0 | 0 | 1 | 0 | 0 | 0 | 0 |
| 727 | 0 | 0 | 0 | 0 | 0 | 1 | 0 | 0 | 0 | 0 | 0 |
| 728 | 0 | 0 | 0 | 0 | 0 | 0 | 0 | 1 | 0 | 0 | 0 |
| 729 | 0 | 0 | 0 | 0 | 0 | 0 | 0 | 0 | 0 | 0 | 0 |
| 730 | 0 | 1 | 2 | 0 | 0 | 0 | 0 | 0 | 0 | 0 | 0 |
| 731 | 0 | 1 | 3 | 0 | 0 | 0 | 0 | 1 | 0 | 0 | 0 |
| 732 | 1 | 1 | 3 | 0 | 0 | 0 | 0 | 1 | 0 | 0 | 0 |
| 733 | 0 | 0 | 0 | 0 | 0 | 0 | 0 | 0 | 0 | 0 | 0 |
| 734 | 0 | 1 | 1 | 0 | 0 | 0 | 0 | 1 | 0 | 0 | 0 |
| 735 | 0 | 1 | 1 | 0 | 0 | 0 | 1 | 0 | 0 | 0 | 0 |
| 736 | 0 | 0 | 0 | 0 | 0 | 0 | 0 | 1 | 0 | 0 | 0 |
| 737 | 0 | 0 | 0 | 0 | 0 | 0 | 0 | 0 | 0 | 0 | 0 |
| 738 | 0 | 0 | 0 | 0 | 0 | 0 | 1 | 0 | 0 | 0 | 0 |

|     |   |   |   |   |   |   |   |   |   |   |   |
|-----|---|---|---|---|---|---|---|---|---|---|---|
| 739 | 0 | 0 | 0 | 1 | 0 | 0 | 0 | 0 | 0 | 0 | 0 |
| 740 | 0 | 1 | 2 | 0 | 1 | 0 | 0 | 0 | 0 | 0 | 0 |
| 741 | 0 | 1 | 3 | 0 | 0 | 0 | 0 | 0 | 0 | 0 | 1 |
| 742 | 0 | 1 | 2 | 0 | 0 | 0 | 0 | 1 | 0 | 0 | 0 |
| 743 | 0 | 1 | 1 | 1 | 0 | 0 | 0 | 0 | 0 | 0 | 0 |
| 744 | 0 | 0 | 0 | 0 | 0 | 1 | 0 | 0 | 0 | 0 | 0 |
| 745 | 0 | 0 | 0 | 0 | 0 | 0 | 0 | 0 | 1 | 0 | 0 |
| 746 | 1 | 1 | 3 | 0 | 0 | 0 | 0 | 0 | 0 | 0 | 1 |
| 747 | 0 | 0 | 0 | 0 | 0 | 0 | 0 | 1 | 0 | 0 | 0 |
| 748 | 0 | 0 | 0 | 0 | 0 | 0 | 1 | 0 | 0 | 0 | 0 |
| 749 | 0 | 0 | 0 | 1 | 0 | 0 | 0 | 0 | 0 | 0 | 0 |
| 750 | 0 | 1 | 1 | 0 | 0 | 0 | 0 | 0 | 0 | 0 | 0 |
| 751 | 0 | 0 | 0 | 0 | 0 | 0 | 0 | 0 | 0 | 0 | 0 |
| 752 | 0 | 0 | 0 | 0 | 1 | 0 | 0 | 0 | 0 | 0 | 0 |
| 753 | 0 | 1 | 2 | 0 | 0 | 0 | 0 | 0 | 0 | 0 | 1 |
| 754 | 0 | 1 | 1 | 0 | 0 | 0 | 0 | 1 | 0 | 0 | 0 |
| 755 | 0 | 1 | 3 | 0 | 0 | 0 | 0 | 0 | 0 | 0 | 0 |
| 756 | 1 | 1 | 2 | 1 | 0 | 0 | 0 | 0 | 0 | 0 | 0 |
| 757 | 0 | 0 | 0 | 0 | 0 | 0 | 0 | 0 | 0 | 0 | 0 |
| 758 | 0 | 1 | 1 | 0 | 0 | 0 | 0 | 0 | 1 | 0 | 0 |
| 759 | 0 | 1 | 1 | 0 | 0 | 0 | 0 | 0 | 1 | 0 | 0 |
| 760 | 1 | 1 | 3 | 1 | 0 | 0 | 0 | 0 | 0 | 0 | 0 |
| 761 | 0 | 0 | 0 | 0 | 0 | 1 | 0 | 0 | 0 | 0 | 0 |
| 762 | 1 | 1 | 3 | 0 | 0 | 0 | 1 | 0 | 0 | 0 | 0 |
| 763 | 0 | 1 | 2 | 0 | 0 | 0 | 0 | 0 | 0 | 0 | 0 |

|     |   |   |   |   |   |   |   |   |   |   |
|-----|---|---|---|---|---|---|---|---|---|---|
| 764 | 1 | 1 | 2 | 0 | 0 | 1 | 0 | 0 | 0 | 0 |
| 765 | 0 | 1 | 1 | 1 | 0 | 0 | 0 | 0 | 0 | 0 |
| 766 | 0 | 1 | 1 | 0 | 0 | 0 | 0 | 0 | 0 | 0 |
| 767 | 0 | 0 | 0 | 0 | 0 | 0 | 0 | 0 | 0 | 0 |
| 768 | 0 | 1 | 1 | 0 | 0 | 0 | 0 | 0 | 0 | 0 |
| 769 | 0 | 1 | 2 | 0 | 0 | 0 | 0 | 1 | 0 | 0 |
| 770 | 1 | 1 | 3 | 0 | 0 | 0 | 0 | 0 | 0 | 0 |
| 771 | 1 | 1 | 3 | 0 | 0 | 1 | 0 | 0 | 0 | 0 |
| 772 | 0 | 0 | 0 | 1 | 0 | 0 | 0 | 0 | 0 | 0 |
| 773 | 0 | 0 | 0 | 0 | 0 | 0 | 0 | 0 | 1 | 0 |
| 774 | 0 | 0 | 0 | 0 | 0 | 0 | 0 | 0 | 0 | 0 |
| 775 | 0 | 1 | 2 | 0 | 0 | 1 | 0 | 0 | 0 | 0 |
| 776 | 0 | 0 | 0 | 0 | 0 | 0 | 0 | 0 | 1 | 0 |
| 777 | 1 | 1 | 3 | 0 | 0 | 0 | 0 | 0 | 0 | 0 |
| 778 | 0 | 0 | 0 | 1 | 0 | 0 | 0 | 0 | 0 | 0 |
| 779 | 0 | 1 | 1 | 0 | 0 | 0 | 0 | 1 | 0 | 0 |
| 780 | 0 | 1 | 3 | 0 | 0 | 0 | 0 | 0 | 0 | 0 |
| 781 | 0 | 1 | 1 | 0 | 0 | 0 | 0 | 1 | 0 | 0 |
| 782 | 0 | 1 | 2 | 0 | 0 | 0 | 0 | 1 | 0 | 0 |
| 783 | 1 | 1 | 2 | 1 | 0 | 0 | 0 | 0 | 0 | 0 |
| 784 | 0 | 0 | 0 | 0 | 0 | 0 | 0 | 0 | 0 | 0 |
| 785 | 0 | 0 | 0 | 1 | 0 | 0 | 0 | 0 | 0 | 0 |
| 786 | 0 | 1 | 1 | 0 | 0 | 0 | 1 | 0 | 0 | 0 |
| 787 | 0 | 1 | 1 | 0 | 0 | 0 | 0 | 1 | 0 | 0 |
| 788 | 0 | 1 | 2 | 0 | 0 | 0 | 0 | 0 | 1 | 0 |



|     |   |   |   |   |   |   |   |   |   |   |
|-----|---|---|---|---|---|---|---|---|---|---|
| 789 | 0 | 1 | 1 | 0 | 0 | 0 | 0 | 1 | 0 | 0 |
| 790 | 0 | 1 | 2 | 0 | 0 | 0 | 0 | 0 | 0 | 1 |
| 791 | 0 | 0 | 0 | 0 | 0 | 0 | 0 | 0 | 0 | 0 |
| 792 | 0 | 1 | 1 | 0 | 0 | 0 | 0 | 0 | 0 | 0 |
| 793 | 0 | 0 | 0 | 0 | 0 | 0 | 0 | 0 | 0 | 0 |
| 794 | 0 | 1 | 2 | 0 | 0 | 0 | 0 | 1 | 0 | 0 |
| 795 | 0 | 1 | 1 | 0 | 0 | 0 | 0 | 1 | 0 | 0 |
| 796 | 0 | 0 | 0 | 1 | 0 | 0 | 0 | 0 | 0 | 0 |
| 797 | 0 | 0 | 0 | 1 | 0 | 0 | 0 | 0 | 0 | 0 |
| 798 | 0 | 0 | 0 | 1 | 0 | 0 | 0 | 0 | 0 | 0 |

| number | cervical cancer | PS(0-2 good; 3-5 poor) | Average background pain score | Pain score at discharge | Distress score | Barthel index | pain | dyspnea | cough | nausea and vomiting |
|--------|-----------------|------------------------|-------------------------------|-------------------------|----------------|---------------|------|---------|-------|---------------------|
| 1      | 0               | 1                      | 4                             | 2                       | 3              | 85            | 1    | 0       | 1     | 1                   |
| 2      | 0               | 2                      | 4                             | 2                       | 2              | 0             | 1    | 0       | 1     | 1                   |
| 3      | 0               | 3                      | 3                             | 2                       | 2              | 5             | 1    | 1       | 0     | 0                   |
| 4      | 0               | 3                      | 4                             | 2                       | 2              | 10            | 1    | 1       | 0     | 1                   |
| 5      | 0               | 3                      | 6                             | 1                       | 2              | 15            | 1    | 0       | 0     | 1                   |
| 6      | 0               | 1                      | 1                             | 2                       | 1              | 20            | 1    | 1       | 1     | 0                   |
| 7      | 0               | 1                      | 3                             | 2                       | 3              | 25            | 1    | 1       | 1     | 0                   |
| 8      | 0               | 3                      | 5                             | 2                       | 2              | 30            | 1    | 1       | 0     | 1                   |
| 9      | 0               | 4                      | 4                             | 1                       | 2              | 35            | 1    | 1       | 1     | 0                   |
| 10     | 0               | 2                      | 6                             | 1                       | 2              | 40            | 1    | 0       | 1     | 1                   |

|    |   |   |   |   |   |    |   |   |   |   |
|----|---|---|---|---|---|----|---|---|---|---|
| 11 | 0 | 3 | 3 | 2 | 3 | 45 | 1 | 1 | 0 | 0 |
| 12 | 0 | 3 | 3 | 2 | 3 | 55 | 1 | 0 | 0 | 1 |
| 13 | 0 | 3 | 3 | 2 | 2 | 50 | 1 | 1 | 1 | 0 |
| 14 | 0 | 1 | 6 | 2 | 3 | 55 | 1 | 1 | 1 | 0 |
| 15 | 0 | 2 | 3 | 3 | 3 | 60 | 1 | 0 | 0 | 0 |
| 16 | 0 | 3 | 7 | 2 | 3 | 65 | 1 | 0 | 1 | 1 |
| 17 | 0 | 2 | 5 | 1 | 2 | 70 | 1 | 1 | 1 | 1 |
| 18 | 0 | 3 | 5 | 2 | 2 | 70 | 1 | 0 | 0 | 1 |
| 19 | 0 | 0 | 4 | 2 | 2 | 60 | 1 | 1 | 0 | 1 |
| 20 | 0 | 1 | 4 | 2 | 2 | 50 | 1 | 1 | 0 | 0 |
| 21 | 0 | 2 | 5 | 2 | 2 | 70 | 1 | 1 | 1 | 0 |
| 22 | 0 | 3 | 8 | 2 | 3 | 75 | 1 | 0 | 1 | 1 |
| 23 | 0 | 4 | 4 | 2 | 3 | 70 | 1 | 0 | 0 | 0 |
| 24 | 0 | 0 | 5 | 2 | 2 | 80 | 1 | 1 | 0 | 0 |
| 25 | 0 | 1 | 6 | 2 | 3 | 50 | 1 | 1 | 1 | 0 |
| 26 | 0 | 2 | 4 | 2 | 1 | 70 | 1 | 1 | 1 | 0 |
| 27 | 0 | 3 | 5 | 2 | 2 | 70 | 1 | 0 | 0 | 0 |
| 28 | 0 | 4 | 4 | 2 | 2 | 70 | 1 | 1 | 0 | 1 |
| 29 | 0 | 0 | 4 | 2 | 1 | 70 | 1 | 0 | 1 | 1 |
| 30 | 0 | 1 | 6 | 2 | 2 | 50 | 1 | 1 | 0 | 0 |
| 31 | 1 | 2 | 3 | 2 | 2 | 60 | 1 | 0 | 0 | 0 |
| 32 | 0 | 3 | 3 | 2 | 2 | 75 | 1 | 0 | 0 | 1 |
| 33 | 0 | 4 | 2 | 2 | 2 | 80 | 1 | 1 | 0 | 0 |
| 34 | 0 | 0 | 0 | 2 | 2 | 90 | 1 | 1 | 0 | 1 |
| 35 | 0 | 1 | 2 | 2 | 1 | 60 | 1 | 1 | 0 | 0 |

|    |   |   |   |   |   |     |   |   |   |   |
|----|---|---|---|---|---|-----|---|---|---|---|
| 36 | 0 | 2 | 2 | 2 | 1 | 50  | 1 | 1 | 1 | 0 |
| 37 | 0 | 3 | 2 | 2 | 2 | 70  | 1 | 1 | 1 | 0 |
| 38 | 0 | 4 | 3 | 2 | 2 | 100 | 1 | 1 | 1 | 1 |
| 39 | 0 | 0 | 2 | 2 | 2 | 85  | 1 | 0 | 0 | 0 |
| 40 | 0 | 1 | 2 | 2 | 2 | 90  | 1 | 0 | 1 | 1 |
| 41 | 1 | 2 | 5 | 5 | 2 | 20  | 1 | 1 | 0 | 0 |
| 42 | 0 | 3 | 2 | 2 | 2 | 50  | 1 | 1 | 1 | 0 |
| 43 | 0 | 4 | 5 | 2 | 2 | 5   | 1 | 0 | 0 | 0 |
| 44 | 0 | 0 | 6 | 2 | 3 | 70  | 1 | 1 | 0 | 1 |
| 45 | 0 | 1 | 4 | 2 | 3 | 40  | 1 | 0 | 0 | 0 |
| 46 | 0 | 2 | 4 | 2 | 1 | 50  | 1 | 0 | 1 | 1 |
| 47 | 0 | 3 | 5 | 1 | 3 | 50  | 1 | 1 | 0 | 1 |
| 48 | 0 | 4 | 3 | 3 | 2 | 50  | 1 | 1 | 1 | 0 |
| 49 | 0 | 0 | 4 | 1 | 2 | 50  | 1 | 1 | 0 | 0 |
| 50 | 0 | 1 | 6 | 2 | 2 | 30  | 1 | 0 | 1 | 1 |
| 51 | 0 | 2 | 3 | 2 | 2 | 50  | 1 | 0 | 1 | 1 |
| 52 | 0 | 3 | 3 | 2 | 2 | 10  | 1 | 1 | 0 | 0 |
| 53 | 0 | 4 | 4 | 2 | 3 | 95  | 1 | 1 | 1 | 0 |
| 54 | 0 | 0 | 7 | 2 | 2 | 50  | 1 | 0 | 0 | 0 |
| 55 | 0 | 1 | 3 | 2 | 2 | 50  | 1 | 1 | 1 | 1 |
| 56 | 0 | 2 | 2 | 2 | 2 | 100 | 1 | 1 | 1 | 1 |
| 57 | 0 | 3 | 1 | 0 | 2 | 100 | 1 | 0 | 0 | 0 |
| 58 | 0 | 4 | 5 | 2 | 2 | 40  | 1 | 1 | 0 | 1 |
| 59 | 0 | 0 | 2 | 2 | 3 | 0   | 1 | 0 | 0 | 0 |
| 60 | 0 | 1 | 3 | 2 | 2 | 50  | 1 | 0 | 1 | 0 |

|    |   |   |   |   |   |     |   |   |   |   |
|----|---|---|---|---|---|-----|---|---|---|---|
| 61 | 1 | 2 | 2 | 2 | 3 | 50  | 1 | 0 | 0 | 0 |
| 62 | 0 | 3 | 6 | 2 | 3 | 50  | 1 | 1 | 0 | 0 |
| 63 | 0 | 4 | 6 | 2 | 1 | 5   | 1 | 0 | 0 | 0 |
| 64 | 0 | 4 | 3 | 2 | 2 | 10  | 1 | 1 | 0 | 0 |
| 65 | 0 | 2 | 7 | 2 | 1 | 75  | 1 | 1 | 0 | 0 |
| 66 | 0 | 0 | 5 | 2 | 1 | 90  | 1 | 0 | 1 | 1 |
| 67 | 0 | 2 | 4 | 3 | 3 | 65  | 1 | 0 | 1 | 0 |
| 68 | 1 | 1 | 5 | 2 | 1 | 35  | 1 | 0 | 0 | 0 |
| 69 | 0 | 3 | 5 | 2 | 5 | 50  | 1 | 0 | 1 | 1 |
| 70 | 0 | 4 | 5 | 2 | 1 | 20  | 1 | 1 | 1 | 0 |
| 71 | 0 | 1 | 6 | 2 | 2 | 65  | 1 | 0 | 1 | 0 |
| 72 | 1 | 2 | 4 | 1 | 1 | 45  | 0 | 0 | 0 | 0 |
| 73 | 0 | 3 | 3 | 3 | 2 | 25  | 1 | 1 | 0 | 0 |
| 74 | 0 | 1 | 4 | 2 | 1 | 60  | 1 | 0 | 0 | 1 |
| 75 | 0 | 3 | 5 | 1 | 3 | 45  | 1 | 0 | 0 | 1 |
| 76 | 0 | 3 | 4 | 3 | 3 | 35  | 1 | 0 | 0 | 1 |
| 77 | 0 | 3 | 4 | 2 | 1 | 45  | 1 | 0 | 0 | 1 |
| 78 | 1 | 4 | 7 | 3 | 1 | 55  | 1 | 1 | 1 | 1 |
| 79 | 0 | 3 | 3 | 3 | 1 | 70  | 1 | 1 | 1 | 1 |
| 80 | 0 | 3 | 4 | 2 | 2 | 50  | 1 | 1 | 1 | 1 |
| 81 | 0 | 1 | 5 | 2 | 2 | 100 | 1 | 0 | 0 | 1 |
| 82 | 0 | 3 | 3 | 2 | 2 | 50  | 1 | 1 | 0 | 1 |
| 83 | 0 | 3 | 3 | 2 | 3 | 80  | 1 | 0 | 0 | 1 |
| 84 | 0 | 2 | 4 | 2 | 1 | 85  | 1 | 0 | 0 | 1 |
| 85 | 0 | 3 | 4 | 2 | 2 | 35  | 1 | 1 | 1 | 1 |

|     |   |   |   |   |   |     |   |   |   |   |
|-----|---|---|---|---|---|-----|---|---|---|---|
| 86  | 0 | 2 | 5 | 2 | 2 | 65  | 1 | 1 | 1 | 0 |
| 87  | 0 | 3 | 7 | 2 | 2 | 100 | 1 | 0 | 1 | 1 |
| 88  | 0 | 3 | 5 | 1 | 2 | 75  | 1 | 0 | 0 | 0 |
| 89  | 0 | 2 | 4 | 1 | 3 | 80  | 1 | 0 | 0 | 1 |
| 90  | 0 | 4 | 5 | 2 | 1 | 40  | 1 | 0 | 0 | 1 |
| 91  | 0 | 3 | 4 | 2 | 2 | 100 | 1 | 1 | 0 | 1 |
| 92  | 0 | 1 | 5 | 3 | 1 | 95  | 1 | 0 | 0 | 0 |
| 93  | 0 | 4 | 4 | 1 | 2 | 60  | 1 | 1 | 1 | 0 |
| 94  | 0 | 3 | 3 | 1 | 1 | 80  | 1 | 0 | 0 | 0 |
| 95  | 0 | 2 | 3 | 1 | 2 | 70  | 1 | 0 | 0 | 0 |
| 96  | 0 | 1 | 2 | 2 | 3 | 80  | 0 | 1 | 1 | 0 |
| 97  | 0 | 3 | 5 | 1 | 2 | 90  | 1 | 0 | 0 | 1 |
| 98  | 0 | 2 | 2 | 1 | 2 | 60  | 1 | 1 | 1 | 0 |
| 99  | 0 | 3 | 4 | 3 | 4 | 90  | 1 | 0 | 1 | 0 |
| 100 | 0 | 3 | 2 | 2 | 2 | 65  | 1 | 1 | 0 | 0 |
| 101 | 0 | 2 | 3 | 3 | 5 | 10  | 1 | 0 | 0 | 1 |
| 102 | 0 | 2 | 5 | 1 | 1 | 100 | 1 | 0 | 0 | 0 |
| 103 | 0 | 4 | 2 | 2 | 3 | 30  | 1 | 1 | 0 | 1 |
| 104 | 0 | 4 | 6 | 2 | 3 | 45  | 1 | 1 | 1 | 1 |
| 105 | 0 | 3 | 6 | 2 | 2 | 70  | 1 | 0 | 0 | 0 |
| 106 | 0 | 3 | 4 | 2 | 2 | 90  | 1 | 0 | 1 | 1 |
| 107 | 0 | 2 | 4 | 4 | 3 | 90  | 1 | 0 | 0 | 0 |
| 108 | 0 | 4 | 1 | 1 | 3 | 25  | 0 | 1 | 1 | 1 |
| 109 | 0 | 4 | 0 | 0 | 2 | 75  | 0 | 1 | 1 | 1 |
| 110 | 0 | 3 | 3 | 2 | 1 | 40  | 1 | 0 | 0 | 0 |

|     |   |   |   |   |   |     |   |   |   |   |
|-----|---|---|---|---|---|-----|---|---|---|---|
| 111 | 0 | 3 | 3 | 2 | 1 | 70  | 1 | 0 | 0 | 0 |
| 112 | 0 | 2 | 4 | 2 | 3 | 60  | 1 | 0 | 0 | 0 |
| 113 | 0 | 1 | 5 | 2 | 3 | 10  | 1 | 0 | 1 | 1 |
| 114 | 0 | 3 | 4 | 2 | 1 | 100 | 1 | 0 | 0 | 1 |
| 115 | 0 | 1 | 3 | 2 | 3 | 75  | 1 | 0 | 1 | 0 |
| 116 | 0 | 4 | 6 | 2 | 2 | 5   | 1 | 0 | 1 | 1 |
| 117 | 0 | 2 | 4 | 2 | 2 | 35  | 1 | 0 | 0 | 0 |
| 118 | 0 | 3 | 5 | 2 | 3 | 50  | 1 | 0 | 1 | 0 |
| 119 | 0 | 2 | 5 | 2 | 2 | 75  | 1 | 0 | 1 | 0 |
| 120 | 0 | 2 | 4 | 2 | 3 | 50  | 1 | 0 | 0 | 1 |
| 121 | 0 | 2 | 4 | 2 | 1 | 45  | 1 | 0 | 0 | 0 |
| 122 | 0 | 2 | 7 | 2 | 1 | 55  | 1 | 0 | 1 | 1 |
| 123 | 0 | 1 | 5 | 2 | 1 | 10  | 1 | 0 | 0 | 0 |
| 124 | 0 | 1 | 4 | 2 | 2 | 40  | 1 | 1 | 0 | 1 |
| 125 | 1 | 2 | 4 | 2 | 1 | 85  | 1 | 0 | 0 | 0 |
| 126 | 0 | 3 | 3 | 2 | 1 | 100 | 0 | 0 | 0 | 1 |
| 127 | 0 | 4 | 6 | 2 | 3 | 60  | 1 | 1 | 1 | 0 |
| 128 | 0 | 0 | 6 | 2 | 2 | 75  | 1 | 0 | 0 | 1 |
| 129 | 1 | 1 | 5 | 2 | 1 | 50  | 1 | 0 | 0 | 0 |
| 130 | 0 | 2 | 5 | 3 | 3 | 43  | 1 | 0 | 0 | 0 |
| 131 | 0 | 3 | 4 | 2 | 1 | 15  | 1 | 0 | 0 | 0 |
| 132 | 0 | 4 | 4 | 1 | 3 | 50  | 1 | 1 | 1 | 0 |
| 133 | 0 | 0 | 6 | 2 | 3 | 30  | 1 | 0 | 0 | 0 |
| 134 | 1 | 1 | 4 | 2 | 1 | 100 | 1 | 0 | 1 | 1 |
| 135 | 0 | 2 | 6 | 1 | 2 | 85  | 1 | 0 | 0 | 0 |

|     |   |   |   |   |   |     |   |   |   |   |
|-----|---|---|---|---|---|-----|---|---|---|---|
| 136 | 0 | 3 | 4 | 2 | 1 | 65  | 1 | 1 | 1 | 0 |
| 137 | 0 | 4 | 6 | 2 | 1 | 40  | 1 | 0 | 1 | 0 |
| 138 | 0 | 0 | 3 | 2 | 2 | 55  | 1 | 0 | 1 | 0 |
| 139 | 0 | 1 | 4 | 2 | 3 | 15  | 1 | 0 | 1 | 1 |
| 140 | 0 | 3 | 5 | 2 | 3 | 30  | 1 | 0 | 0 | 0 |
| 141 | 0 | 3 | 4 | 2 | 4 | 75  | 0 | 1 | 0 | 0 |
| 142 | 1 | 1 | 5 | 2 | 2 | 80  | 1 | 0 | 0 | 0 |
| 143 | 0 | 4 | 7 | 2 | 2 | 20  | 1 | 0 | 0 | 1 |
| 144 | 0 | 3 | 5 | 2 | 3 | 50  | 1 | 0 | 0 | 0 |
| 145 | 0 | 2 | 5 | 1 | 2 | 70  | 1 | 0 | 0 | 1 |
| 146 | 0 | 1 | 4 | 3 | 4 | 80  | 0 | 0 | 0 | 0 |
| 147 | 0 | 1 | 7 | 2 | 4 | 80  | 1 | 1 | 1 | 1 |
| 148 | 0 | 1 | 3 | 2 | 2 | 100 | 1 | 0 | 0 | 0 |
| 149 | 0 | 1 | 6 | 2 | 3 | 50  | 1 | 1 | 0 | 1 |
| 150 | 1 | 2 | 4 | 2 | 2 | 90  | 1 | 0 | 0 | 0 |
| 151 | 0 | 1 | 4 | 3 | 2 | 70  | 1 | 0 | 1 | 1 |
| 152 | 0 | 2 | 7 | 2 | 2 | 50  | 1 | 0 | 0 | 1 |
| 153 | 0 | 2 | 5 | 1 | 2 | 70  | 0 | 0 | 1 | 1 |
| 154 | 0 | 2 | 6 | 2 | 2 | 75  | 0 | 1 | 1 | 0 |
| 155 | 0 | 1 | 2 | 2 | 3 | 90  | 1 | 0 | 0 | 1 |
| 156 | 0 | 1 | 8 | 2 | 1 | 100 | 1 | 1 | 0 | 0 |
| 157 | 0 | 3 | 4 | 2 | 2 | 70  | 1 | 1 | 1 | 0 |
| 158 | 1 | 2 | 4 | 3 | 2 | 60  | 1 | 0 | 0 | 0 |
| 159 | 0 | 2 | 6 | 2 | 2 | 50  | 1 | 0 | 0 | 0 |
| 160 | 0 | 2 | 6 | 2 | 2 | 70  | 1 | 0 | 1 | 1 |

|     |   |   |   |   |   |     |   |   |   |   |
|-----|---|---|---|---|---|-----|---|---|---|---|
| 161 | 0 | 1 | 7 | 1 | 2 | 70  | 1 | 0 | 0 | 0 |
| 162 | 0 | 2 | 4 | 2 | 3 | 50  | 1 | 0 | 1 | 0 |
| 163 | 0 | 2 | 4 | 2 | 2 | 100 | 1 | 0 | 0 | 0 |
| 164 | 0 | 1 | 0 | 2 | 1 | 50  | 1 | 0 | 1 | 1 |
| 165 | 0 | 2 | 5 | 2 | 3 | 100 | 1 | 0 | 0 | 0 |
| 166 | 0 | 1 | 8 | 2 | 2 | 70  | 1 | 0 | 0 | 1 |
| 167 | 0 | 1 | 8 | 2 | 2 | 70  | 1 | 0 | 0 | 0 |
| 168 | 0 | 2 | 4 | 2 | 3 | 50  | 1 | 0 | 0 | 0 |
| 169 | 0 | 3 | 4 | 2 | 3 | 70  | 1 | 0 | 0 | 0 |
| 170 | 0 | 2 | 4 | 3 | 3 | 50  | 1 | 0 | 0 | 0 |
| 171 | 0 | 3 | 8 | 2 | 1 | 70  | 1 | 0 | 0 | 0 |
| 172 | 0 | 3 | 4 | 2 | 1 | 70  | 1 | 0 | 0 | 1 |
| 173 | 0 | 3 | 5 | 2 | 2 | 70  | 1 | 0 | 1 | 1 |
| 174 | 0 | 1 | 4 | 2 | 2 | 50  | 1 | 0 | 0 | 1 |
| 175 | 0 | 1 | 6 | 2 | 3 | 70  | 1 | 0 | 0 | 0 |
| 176 | 0 | 2 | 4 | 2 | 1 | 70  | 1 | 1 | 0 | 0 |
| 177 | 0 | 0 | 3 | 2 | 2 | 50  | 1 | 0 | 0 | 0 |
| 178 | 0 | 2 | 7 | 2 | 2 | 70  | 1 | 1 | 1 | 1 |
| 179 | 0 | 2 | 3 | 2 | 1 | 50  | 1 | 0 | 0 | 0 |
| 180 | 0 | 0 | 3 | 1 | 1 | 70  | 1 | 0 | 0 | 0 |
| 181 | 0 | 0 | 2 | 1 | 2 | 90  | 1 | 0 | 0 | 0 |
| 182 | 0 | 1 | 4 | 2 | 2 | 50  | 1 | 0 | 0 | 0 |
| 183 | 0 | 3 | 4 | 2 | 2 | 50  | 1 | 0 | 0 | 1 |
| 184 | 1 | 2 | 7 | 2 | 2 | 70  | 1 | 0 | 0 | 0 |
| 185 | 0 | 1 | 5 | 2 | 1 | 80  | 1 | 0 | 0 | 0 |



|     |   |   |   |   |   |     |   |   |   |   |
|-----|---|---|---|---|---|-----|---|---|---|---|
| 186 | 0 | 4 | 6 | 3 | 2 | 70  | 1 | 0 | 0 | 0 |
| 187 | 1 | 1 | 4 | 2 | 1 | 20  | 1 | 0 | 1 | 0 |
| 188 | 0 | 3 | 4 | 1 | 3 | 50  | 1 | 0 | 0 | 0 |
| 189 | 0 | 1 | 4 | 2 | 2 | 70  | 1 | 0 | 0 | 0 |
| 190 | 0 | 4 | 4 | 2 | 3 | 30  | 1 | 0 | 0 | 1 |
| 191 | 0 | 3 | 4 | 2 | 3 | 40  | 1 | 1 | 1 | 0 |
| 192 | 0 | 1 | 4 | 1 | 3 | 40  | 1 | 0 | 0 | 0 |
| 193 | 0 | 1 | 4 | 2 | 3 | 50  | 1 | 0 | 0 | 0 |
| 194 | 1 | 1 | 4 | 1 | 3 | 70  | 1 | 0 | 0 | 1 |
| 195 | 0 | 2 | 4 | 2 | 3 | 30  | 1 | 0 | 0 | 0 |
| 196 | 0 | 2 | 4 | 1 | 3 | 60  | 1 | 0 | 0 | 0 |
| 197 | 0 | 1 | 4 | 2 | 1 | 90  | 1 | 0 | 0 | 0 |
| 198 | 0 | 1 | 1 | 2 | 1 | 70  | 1 | 0 | 0 | 0 |
| 199 | 0 | 1 | 5 | 2 | 1 | 100 | 1 | 1 | 0 | 1 |
| 200 | 0 | 1 | 4 | 2 | 3 | 90  | 1 | 0 | 0 | 0 |
| 201 | 0 | 3 | 4 | 1 | 2 | 40  | 1 | 0 | 0 | 0 |
| 202 | 0 | 2 | 5 | 2 | 2 | 20  | 1 | 1 | 1 | 0 |
| 203 | 0 | 2 | 4 | 1 | 2 | 60  | 1 | 0 | 0 | 0 |
| 204 | 0 | 3 | 5 | 1 | 2 | 90  | 1 | 0 | 0 | 0 |
| 205 | 0 | 0 | 6 | 0 | 1 | 100 | 1 | 0 | 0 | 1 |
| 206 | 0 | 1 | 2 | 2 | 2 | 70  | 1 | 0 | 1 | 0 |
| 207 | 0 | 3 | 4 | 2 | 3 | 25  | 1 | 0 | 0 | 0 |
| 208 | 0 | 1 | 4 | 2 | 2 | 60  | 1 | 1 | 0 | 0 |
| 209 | 0 | 3 | 4 | 1 | 2 | 75  | 1 | 0 | 0 | 0 |
| 210 | 0 | 4 | 5 | 2 | 2 | 40  | 1 | 0 | 0 | 0 |

|     |   |   |   |   |   |     |   |   |   |   |
|-----|---|---|---|---|---|-----|---|---|---|---|
| 211 | 0 | 3 | 4 | 1 | 6 | 40  | 1 | 0 | 0 | 0 |
| 212 | 0 | 2 | 4 | 2 | 2 | 75  | 1 | 0 | 0 | 0 |
| 213 | 0 | 1 | 3 | 2 | 2 | 100 | 1 | 1 | 0 | 0 |
| 214 | 0 | 0 | 4 | 2 | 2 | 80  | 1 | 0 | 0 | 0 |
| 215 | 0 | 1 | 4 | 2 | 2 | 70  | 1 | 0 | 0 | 1 |
| 216 | 0 | 2 | 5 | 2 | 2 | 75  | 1 | 0 | 1 | 0 |
| 217 | 0 | 2 | 6 | 2 | 3 | 50  | 1 | 0 | 0 | 0 |
| 218 | 0 | 2 | 7 | 2 | 2 | 70  | 1 | 0 | 0 | 0 |
| 219 | 0 | 3 | 5 | 3 | 2 | 70  | 1 | 0 | 1 | 0 |
| 220 | 0 | 2 | 6 | 2 | 2 | 75  | 1 | 1 | 0 | 0 |
| 221 | 0 | 2 | 4 | 2 | 2 | 90  | 1 | 0 | 0 | 1 |
| 222 | 0 | 2 | 4 | 1 | 1 | 25  | 1 | 0 | 0 | 0 |
| 223 | 0 | 1 | 5 | 2 | 2 | 70  | 1 | 0 | 0 | 1 |
| 224 | 0 | 1 | 4 | 2 | 2 | 90  | 1 | 0 | 0 | 1 |
| 225 | 0 | 0 | 2 | 2 | 1 | 95  | 1 | 0 | 0 | 0 |
| 226 | 0 | 2 | 4 | 2 | 3 | 70  | 1 | 1 | 0 | 0 |
| 227 | 0 | 1 | 5 | 1 | 2 | 50  | 1 | 0 | 0 | 1 |
| 228 | 0 | 0 | 4 | 2 | 2 | 70  | 1 | 0 | 0 | 0 |
| 229 | 0 | 1 | 4 | 2 | 3 | 70  | 1 | 0 | 0 | 1 |
| 230 | 0 | 2 | 4 | 1 | 2 | 50  | 1 | 0 | 0 | 1 |
| 231 | 1 | 2 | 5 | 2 | 1 | 30  | 1 | 0 | 0 | 0 |
| 232 | 0 | 1 | 4 | 3 | 2 | 70  | 1 | 0 | 0 | 0 |
| 233 | 0 | 2 | 4 | 1 | 2 | 50  | 1 | 0 | 0 | 0 |
| 234 | 1 | 2 | 6 | 2 | 3 | 50  | 1 | 0 | 1 | 1 |
| 235 | 1 | 1 | 2 | 1 | 2 | 70  | 0 | 0 | 0 | 0 |

|     |   |   |   |   |   |     |   |   |   |   |
|-----|---|---|---|---|---|-----|---|---|---|---|
| 236 | 0 | 3 | 6 | 2 | 2 | 35  | 1 | 0 | 0 | 1 |
| 237 | 0 | 1 | 4 | 2 | 2 | 40  | 1 | 1 | 0 | 0 |
| 238 | 0 | 2 | 4 | 2 | 3 | 45  | 1 | 0 | 0 | 1 |
| 239 | 0 | 3 | 4 | 2 | 2 | 50  | 0 | 0 | 0 | 0 |
| 240 | 0 | 1 | 6 | 2 | 2 | 50  | 1 | 0 | 0 | 0 |
| 241 | 0 | 1 | 4 | 1 | 2 | 50  | 1 | 1 | 0 | 1 |
| 242 | 0 | 2 | 3 | 2 | 2 | 55  | 1 | 0 | 0 | 1 |
| 243 | 0 | 1 | 4 | 2 | 2 | 30  | 1 | 0 | 0 | 0 |
| 244 | 0 | 1 | 6 | 2 | 2 | 35  | 1 | 1 | 0 | 1 |
| 245 | 0 | 1 | 4 | 2 | 2 | 35  | 1 | 0 | 0 | 0 |
| 246 | 0 | 2 | 6 | 2 | 3 | 50  | 1 | 0 | 1 | 1 |
| 247 | 0 | 1 | 5 | 2 | 2 | 40  | 1 | 0 | 0 | 0 |
| 248 | 0 | 2 | 4 | 1 | 3 | 50  | 1 | 1 | 0 | 0 |
| 249 | 0 | 1 | 5 | 2 | 3 | 80  | 1 | 0 | 0 | 1 |
| 250 | 0 | 1 | 5 | 2 | 2 | 60  | 1 | 0 | 0 | 0 |
| 251 | 0 | 2 | 5 | 2 | 1 | 65  | 1 | 0 | 1 | 0 |
| 252 | 0 | 1 | 4 | 2 | 2 | 70  | 1 | 0 | 0 | 1 |
| 253 | 0 | 1 | 1 | 2 | 2 | 100 | 1 | 0 | 0 | 1 |
| 254 | 1 | 0 | 0 | 2 | 2 | 100 | 1 | 0 | 0 | 1 |
| 255 | 0 | 2 | 7 | 2 | 1 | 100 | 1 | 0 | 0 | 1 |
| 256 | 1 | 3 | 5 | 1 | 2 | 70  | 1 | 0 | 0 | 0 |
| 257 | 0 | 2 | 5 | 4 | 2 | 50  | 1 | 0 | 0 | 0 |
| 258 | 0 | 1 | 4 | 2 | 2 | 75  | 1 | 0 | 0 | 0 |
| 259 | 0 | 1 | 5 | 2 | 2 | 70  | 1 | 0 | 0 | 0 |
| 260 | 0 | 1 | 4 | 2 | 2 | 85  | 1 | 0 | 0 | 1 |

|     |   |   |   |   |   |     |   |   |   |   |
|-----|---|---|---|---|---|-----|---|---|---|---|
| 261 | 0 | 4 | 5 | 2 | 2 | 50  | 1 | 0 | 0 | 0 |
| 262 | 0 | 2 | 6 | 2 | 2 | 60  | 1 | 1 | 0 | 0 |
| 263 | 0 | 3 | 6 | 2 | 2 | 50  | 1 | 0 | 0 | 0 |
| 264 | 0 | 1 | 5 | 2 | 2 | 50  | 1 | 0 | 0 | 1 |
| 265 | 0 | 3 | 3 | 2 | 2 | 75  | 0 | 0 | 0 | 0 |
| 266 | 0 | 3 | 4 | 2 | 2 | 70  | 0 | 1 | 1 | 1 |
| 267 | 0 | 0 | 3 | 1 | 2 | 100 | 1 | 0 | 0 | 0 |
| 268 | 0 | 1 | 0 | 1 | 3 | 50  | 0 | 0 | 1 | 0 |
| 269 | 0 | 2 | 5 | 1 | 1 | 70  | 1 | 0 | 0 | 0 |
| 270 | 0 | 1 | 4 | 1 | 2 | 70  | 1 | 0 | 0 | 0 |
| 271 | 0 | 1 | 6 | 1 | 2 | 50  | 1 | 0 | 0 | 0 |
| 272 | 0 | 2 | 6 | 2 | 1 | 70  | 1 | 0 | 0 | 1 |
| 273 | 0 | 1 | 5 | 2 | 2 | 70  | 1 | 0 | 0 | 0 |
| 274 | 0 | 1 | 5 | 3 | 1 | 70  | 1 | 0 | 0 | 0 |
| 275 | 0 | 1 | 5 | 2 | 1 | 85  | 1 | 1 | 1 | 0 |
| 276 | 0 | 3 | 7 | 2 | 1 | 70  | 1 | 0 | 0 | 0 |
| 277 | 0 | 2 | 4 | 2 | 1 | 100 | 1 | 0 | 0 | 0 |
| 278 | 0 | 2 | 4 | 2 | 2 | 50  | 1 | 0 | 0 | 0 |
| 279 | 0 | 3 | 6 | 2 | 2 | 45  | 1 | 0 | 0 | 1 |
| 280 | 0 | 3 | 4 | 2 | 1 | 70  | 1 | 0 | 0 | 0 |
| 281 | 0 | 4 | 4 | 2 | 1 | 50  | 0 | 1 | 1 | 0 |
| 282 | 0 | 2 | 8 | 2 | 2 | 50  | 1 | 0 | 0 | 0 |
| 283 | 0 | 2 | 4 | 2 | 2 | 70  | 1 | 0 | 0 | 0 |
| 284 | 0 | 1 | 4 | 2 | 2 | 70  | 1 | 0 | 0 | 0 |
| 285 | 0 | 2 | 6 | 3 | 2 | 50  | 1 | 0 | 0 | 0 |

|     |   |   |   |   |   |    |   |   |   |   |
|-----|---|---|---|---|---|----|---|---|---|---|
| 286 | 0 | 1 | 2 | 2 | 2 | 20 | 1 | 0 | 0 | 0 |
| 287 | 0 | 2 | 4 | 2 | 1 | 50 | 1 | 0 | 0 | 0 |
| 288 | 0 | 3 | 4 | 2 | 2 | 80 | 1 | 0 | 0 | 0 |
| 289 | 0 | 2 | 7 | 2 | 1 | 70 | 1 | 0 | 0 | 0 |
| 290 | 0 | 3 | 5 | 1 | 2 | 70 | 1 | 0 | 0 | 0 |
| 291 | 0 | 0 | 0 | 1 | 2 | 80 | 1 | 0 | 0 | 1 |
| 292 | 0 | 1 | 6 | 2 | 3 | 50 | 1 | 0 | 0 | 0 |
| 293 | 0 | 1 | 6 | 1 | 2 | 80 | 1 | 0 | 0 | 0 |
| 294 | 0 | 1 | 4 | 2 | 3 | 70 | 1 | 0 | 0 | 0 |
| 295 | 0 | 1 | 6 | 1 | 2 | 60 | 1 | 0 | 1 | 1 |
| 296 | 0 | 1 | 4 | 2 | 2 | 30 | 1 | 0 | 0 | 0 |
| 297 | 0 | 3 | 6 | 2 | 3 | 70 | 1 | 0 | 0 | 0 |
| 298 | 0 | 1 | 9 | 2 | 2 | 70 | 1 | 0 | 0 | 0 |
| 299 | 0 | 2 | 5 | 2 | 2 | 70 | 1 | 0 | 0 | 0 |
| 300 | 0 | 1 | 4 | 2 | 2 | 80 | 1 | 1 | 1 | 0 |
| 301 | 0 | 2 | 6 | 2 | 3 | 50 | 1 | 0 | 0 | 0 |
| 302 | 0 | 2 | 6 | 2 | 1 | 70 | 1 | 0 | 0 | 0 |
| 303 | 0 | 0 | 2 | 2 | 2 | 70 | 1 | 0 | 0 | 1 |
| 304 | 0 | 0 | 4 | 2 | 2 | 50 | 1 | 0 | 0 | 0 |
| 305 | 0 | 2 | 5 | 2 | 3 | 10 | 1 | 0 | 0 | 0 |
| 306 | 0 | 2 | 8 | 2 | 3 | 70 | 1 | 0 | 0 | 0 |
| 307 | 0 | 2 | 4 | 2 | 3 | 40 | 1 | 0 | 0 | 1 |
| 308 | 0 | 1 | 2 | 2 | 3 | 70 | 1 | 1 | 1 | 0 |
| 309 | 0 | 3 | 5 | 2 | 3 | 50 | 1 | 1 | 0 | 0 |
| 310 | 0 | 1 | 5 | 2 | 2 | 50 | 1 | 0 | 0 | 0 |

|     |   |   |   |   |   |    |   |   |   |   |
|-----|---|---|---|---|---|----|---|---|---|---|
| 311 | 0 | 1 | 3 | 2 | 1 | 95 | 1 | 0 | 1 | 0 |
| 312 | 0 | 2 | 2 | 2 | 2 | 70 | 1 | 0 | 0 | 1 |
| 313 | 0 | 4 | 4 | 2 | 3 | 50 | 1 | 0 | 0 | 0 |
| 314 | 0 | 3 | 3 | 2 | 2 | 50 | 1 | 0 | 0 | 0 |
| 315 | 0 | 3 | 3 | 2 | 2 | 70 | 1 | 0 | 0 | 0 |
| 316 | 0 | 2 | 3 | 2 | 2 | 70 | 1 | 0 | 1 | 0 |
| 317 | 0 | 3 | 5 | 3 | 2 | 20 | 1 | 0 | 1 | 0 |
| 318 | 0 | 3 | 3 | 2 | 2 | 70 | 1 | 0 | 0 | 0 |
| 319 | 0 | 2 | 4 | 2 | 2 | 70 | 1 | 0 | 0 | 0 |
| 320 | 0 | 1 | 4 | 2 | 2 | 55 | 1 | 0 | 0 | 0 |
| 321 | 1 | 3 | 2 | 2 | 2 | 60 | 1 | 0 | 0 | 0 |
| 322 | 0 | 2 | 3 | 2 | 2 | 50 | 1 | 0 | 0 | 1 |
| 323 | 0 | 1 | 3 | 2 | 2 | 50 | 1 | 0 | 0 | 0 |
| 324 | 0 | 3 | 5 | 2 | 2 | 65 | 1 | 0 | 0 | 0 |
| 325 | 0 | 2 | 6 | 2 | 2 | 70 | 1 | 1 | 1 | 0 |
| 326 | 0 | 3 | 4 | 2 | 3 | 60 | 1 | 0 | 1 | 0 |
| 327 | 0 | 1 | 4 | 2 | 2 | 70 | 1 | 0 | 0 | 0 |
| 328 | 0 | 1 | 5 | 2 | 2 | 75 | 1 | 0 | 0 | 0 |
| 329 | 0 | 1 | 5 | 2 | 1 | 75 | 1 | 0 | 0 | 0 |
| 330 | 0 | 2 | 5 | 2 | 2 | 80 | 1 | 0 | 0 | 0 |
| 331 | 0 | 2 | 5 | 2 | 2 | 60 | 1 | 0 | 0 | 0 |
| 332 | 0 | 2 | 3 | 2 | 2 | 50 | 1 | 0 | 0 | 1 |
| 333 | 0 | 1 | 4 | 2 | 2 | 85 | 1 | 0 | 0 | 0 |
| 334 | 0 | 2 | 3 | 2 | 1 | 60 | 1 | 0 | 0 | 0 |
| 335 | 0 | 2 | 4 | 2 | 2 | 50 | 1 | 0 | 0 | 0 |

|     |   |   |   |   |   |     |   |   |   |   |
|-----|---|---|---|---|---|-----|---|---|---|---|
| 336 | 0 | 1 | 5 | 2 | 2 | 70  | 1 | 0 | 1 | 0 |
| 337 | 0 | 3 | 3 | 2 | 1 | 50  | 1 | 0 | 0 | 1 |
| 338 | 0 | 3 | 3 | 2 | 2 | 70  | 1 | 0 | 0 | 0 |
| 339 | 0 | 3 | 3 | 2 | 1 | 60  | 1 | 0 | 1 | 0 |
| 340 | 0 | 3 | 6 | 2 | 2 | 90  | 1 | 0 | 0 | 0 |
| 341 | 0 | 4 | 7 | 2 | 1 | 95  | 1 | 0 | 0 | 0 |
| 342 | 0 | 0 | 2 | 2 | 1 | 70  | 1 | 1 | 1 | 0 |
| 343 | 0 | 1 | 2 | 2 | 2 | 20  | 1 | 0 | 0 | 0 |
| 344 | 0 | 0 | 2 | 2 | 1 | 100 | 1 | 1 | 1 | 0 |
| 345 | 0 | 0 | 2 | 2 | 2 | 5   | 1 | 0 | 0 | 1 |
| 346 | 0 | 0 | 5 | 2 | 1 | 70  | 1 | 0 | 0 | 0 |
| 347 | 0 | 2 | 3 | 2 | 2 | 50  | 1 | 0 | 0 | 0 |
| 348 | 0 | 1 | 2 | 2 | 1 | 10  | 1 | 0 | 1 | 1 |
| 349 | 0 | 2 | 2 | 2 | 1 | 70  | 1 | 0 | 0 | 0 |
| 350 | 0 | 1 | 2 | 2 | 2 | 60  | 1 | 0 | 0 | 1 |
| 351 | 0 | 0 | 5 | 2 | 1 | 70  | 1 | 0 | 1 | 1 |
| 352 | 0 | 3 | 4 | 2 | 3 | 50  | 1 | 0 | 0 | 0 |
| 353 | 0 | 0 | 2 | 2 | 1 | 70  | 1 | 0 | 0 | 1 |
| 354 | 0 | 4 | 3 | 2 | 2 | 15  | 1 | 1 | 1 | 0 |
| 355 | 0 | 2 | 3 | 2 | 2 | 50  | 1 | 0 | 0 | 0 |
| 356 | 0 | 2 | 4 | 2 | 1 | 70  | 1 | 0 | 0 | 1 |
| 357 | 1 | 2 | 6 | 2 | 2 | 70  | 1 | 0 | 0 | 0 |
| 358 | 0 | 1 | 2 | 2 | 2 | 50  | 1 | 0 | 0 | 1 |
| 359 | 0 | 2 | 6 | 2 | 2 | 40  | 1 | 0 | 0 | 0 |
| 360 | 0 | 4 | 3 | 2 | 2 | 60  | 1 | 0 | 0 | 0 |

|     |   |   |   |   |   |     |   |   |   |   |
|-----|---|---|---|---|---|-----|---|---|---|---|
| 361 | 0 | 3 | 3 | 2 | 2 | 60  | 1 | 1 | 0 | 0 |
| 362 | 0 | 1 | 2 | 2 | 2 | 80  | 1 | 0 | 0 | 0 |
| 363 | 0 | 2 | 2 | 2 | 2 | 70  | 1 | 0 | 0 | 0 |
| 364 | 0 | 1 | 3 | 3 | 2 | 20  | 1 | 1 | 0 | 0 |
| 365 | 1 | 1 | 7 | 2 | 3 | 50  | 1 | 0 | 0 | 1 |
| 366 | 0 | 3 | 3 | 2 | 2 | 25  | 1 | 0 | 0 | 0 |
| 367 | 1 | 1 | 3 | 2 | 3 | 60  | 1 | 0 | 0 | 0 |
| 368 | 0 | 3 | 1 | 2 | 2 | 30  | 1 | 1 | 0 | 0 |
| 369 | 0 | 1 | 4 | 2 | 2 | 85  | 1 | 0 | 0 | 1 |
| 370 | 0 | 1 | 3 | 2 | 3 | 35  | 1 | 0 | 0 | 0 |
| 371 | 0 | 1 | 3 | 2 | 2 | 70  | 1 | 0 | 0 | 0 |
| 372 | 1 | 1 | 2 | 2 | 1 | 70  | 1 | 0 | 0 | 0 |
| 373 | 0 | 0 | 2 | 2 | 2 | 90  | 1 | 0 | 0 | 0 |
| 374 | 0 | 4 | 2 | 2 | 2 | 40  | 1 | 1 | 1 | 0 |
| 375 | 0 | 3 | 3 | 2 | 2 | 50  | 1 | 0 | 0 | 1 |
| 376 | 0 | 1 | 1 | 2 | 1 | 70  | 1 | 0 | 0 | 0 |
| 377 | 1 | 2 | 2 | 2 | 2 | 60  | 1 | 0 | 0 | 0 |
| 378 | 0 | 1 | 3 | 2 | 2 | 100 | 1 | 0 | 0 | 0 |
| 379 | 0 | 0 | 3 | 2 | 3 | 45  | 1 | 0 | 0 | 1 |
| 380 | 0 | 3 | 4 | 2 | 2 | 60  | 1 | 0 | 0 | 0 |
| 381 | 1 | 2 | 3 | 2 | 2 | 50  | 1 | 0 | 0 | 0 |
| 382 | 0 | 2 | 4 | 2 | 2 | 100 | 1 | 0 | 0 | 1 |
| 383 | 0 | 4 | 4 | 2 | 1 | 50  | 1 | 1 | 1 | 0 |
| 384 | 0 | 3 | 4 | 2 | 2 | 50  | 1 | 0 | 0 | 0 |
| 385 | 0 | 1 | 6 | 2 | 2 | 55  | 1 | 0 | 0 | 1 |



|     |   |   |   |   |   |    |   |   |   |   |
|-----|---|---|---|---|---|----|---|---|---|---|
| 386 | 0 | 1 | 4 | 2 | 2 | 70 | 1 | 1 | 0 | 0 |
| 387 | 0 | 2 | 3 | 2 | 2 | 80 | 1 | 0 | 0 | 0 |
| 388 | 0 | 1 | 6 | 2 | 2 | 60 | 1 | 0 | 0 | 0 |
| 389 | 0 | 2 | 6 | 2 | 2 | 50 | 1 | 0 | 0 | 1 |
| 390 | 0 | 2 | 3 | 2 | 3 | 65 | 1 | 0 | 0 | 0 |
| 391 | 0 | 2 | 5 | 2 | 2 | 50 | 1 | 0 | 1 | 0 |
| 392 | 0 | 3 | 3 | 2 | 2 | 40 | 1 | 1 | 1 | 1 |
| 393 | 0 | 4 | 3 | 2 | 2 | 50 | 1 | 1 | 1 | 0 |
| 394 | 0 | 1 | 3 | 2 | 2 | 90 | 1 | 0 | 0 | 0 |
| 395 | 0 | 1 | 4 | 2 | 2 | 80 | 1 | 0 | 0 | 0 |
| 396 | 0 | 2 | 3 | 2 | 2 | 80 | 1 | 0 | 0 | 0 |
| 397 | 0 | 2 | 3 | 2 | 3 | 70 | 1 | 0 | 1 | 0 |
| 398 | 0 | 3 | 4 | 3 | 2 | 70 | 1 | 0 | 0 | 0 |
| 399 | 0 | 3 | 4 | 2 | 2 | 50 | 1 | 1 | 1 | 0 |
| 400 | 0 | 4 | 3 | 2 | 2 | 50 | 1 | 0 | 1 | 0 |
| 401 | 0 | 1 | 3 | 2 | 3 | 50 | 1 | 0 | 0 | 0 |
| 402 | 0 | 2 | 5 | 3 | 2 | 35 | 1 | 0 | 0 | 0 |
| 403 | 0 | 3 | 5 | 2 | 2 | 80 | 1 | 1 | 1 | 0 |
| 404 | 0 | 2 | 5 | 2 | 2 | 65 | 1 | 0 | 0 | 0 |
| 405 | 0 | 2 | 2 | 2 | 2 | 70 | 1 | 0 | 0 | 1 |
| 406 | 0 | 1 | 2 | 2 | 2 | 80 | 1 | 0 | 1 | 0 |
| 407 | 0 | 1 | 4 | 2 | 2 | 90 | 1 | 0 | 0 | 0 |
| 408 | 0 | 1 | 3 | 2 | 2 | 75 | 1 | 0 | 0 | 1 |
| 409 | 0 | 2 | 5 | 2 | 3 | 80 | 1 | 0 | 0 | 0 |
| 410 | 0 | 2 | 6 | 2 | 2 | 70 | 1 | 1 | 1 | 0 |

|     |   |   |   |   |   |     |   |   |   |   |
|-----|---|---|---|---|---|-----|---|---|---|---|
| 411 | 0 | 2 | 4 | 2 | 3 | 30  | 1 | 0 | 0 | 0 |
| 412 | 1 | 2 | 3 | 2 | 2 | 50  | 1 | 0 | 0 | 1 |
| 413 | 0 | 2 | 3 | 2 | 2 | 85  | 1 | 0 | 0 | 1 |
| 414 | 0 | 2 | 3 | 2 | 2 | 90  | 1 | 0 | 0 | 1 |
| 415 | 0 | 1 | 2 | 2 | 2 | 90  | 1 | 0 | 0 | 0 |
| 416 | 0 | 3 | 3 | 2 | 2 | 50  | 1 | 0 | 0 | 0 |
| 417 | 0 | 2 | 3 | 2 | 2 | 95  | 1 | 0 | 0 | 1 |
| 418 | 0 | 2 | 4 | 2 | 2 | 90  | 1 | 0 | 0 | 0 |
| 419 | 0 | 1 | 1 | 2 | 2 | 90  | 1 | 0 | 0 | 1 |
| 420 | 0 | 0 | 4 | 2 | 2 | 100 | 1 | 0 | 0 | 0 |
| 421 | 0 | 3 | 2 | 2 | 2 | 100 | 1 | 0 | 0 | 0 |
| 422 | 0 | 3 | 3 | 2 | 2 | 75  | 1 | 0 | 0 | 1 |
| 423 | 0 | 1 | 6 | 2 | 1 | 60  | 1 | 0 | 0 | 1 |
| 424 | 0 | 3 | 2 | 2 | 2 | 50  | 1 | 0 | 0 | 0 |
| 425 | 0 | 2 | 3 | 2 | 2 | 50  | 1 | 0 | 0 | 0 |
| 426 | 0 | 2 | 2 | 2 | 1 | 5   | 1 | 0 | 0 | 0 |
| 427 | 0 | 2 | 3 | 2 | 2 | 50  | 1 | 0 | 1 | 0 |
| 428 | 0 | 2 | 2 | 2 | 2 | 10  | 1 | 1 | 0 | 1 |
| 429 | 0 | 2 | 2 | 2 | 1 | 15  | 1 | 1 | 0 | 0 |
| 430 | 0 | 1 | 2 | 2 | 1 | 100 | 1 | 0 | 0 | 0 |
| 431 | 0 | 0 | 3 | 2 | 2 | 50  | 1 | 1 | 0 | 0 |
| 432 | 1 | 0 | 3 | 2 | 3 | 50  | 1 | 0 | 0 | 0 |
| 433 | 0 | 2 | 5 | 2 | 1 | 20  | 1 | 0 | 0 | 0 |
| 434 | 0 | 3 | 2 | 2 | 1 | 70  | 1 | 0 | 1 | 0 |
| 435 | 0 | 2 | 6 | 2 | 2 | 90  | 1 | 0 | 0 | 0 |

|     |   |   |   |   |   |     |   |   |   |   |
|-----|---|---|---|---|---|-----|---|---|---|---|
| 436 | 0 | 1 | 3 | 2 | 2 | 60  | 1 | 0 | 0 | 0 |
| 437 | 0 | 1 | 2 | 2 | 2 | 25  | 1 | 0 | 0 | 1 |
| 438 | 0 | 2 | 6 | 2 | 2 | 30  | 1 | 0 | 0 | 1 |
| 439 | 0 | 1 | 2 | 2 | 1 | 70  | 0 | 0 | 1 | 0 |
| 440 | 1 | 2 | 2 | 2 | 2 | 80  | 1 | 0 | 0 | 0 |
| 441 | 0 | 2 | 2 | 2 | 2 | 35  | 1 | 0 | 1 | 0 |
| 442 | 0 | 4 | 2 | 2 | 1 | 90  | 1 | 0 | 1 | 0 |
| 443 | 0 | 1 | 3 | 2 | 2 | 55  | 1 | 0 | 1 | 1 |
| 444 | 0 | 1 | 6 | 2 | 2 | 100 | 1 | 0 | 0 | 0 |
| 445 | 0 | 0 | 2 | 2 | 2 | 40  | 1 | 0 | 0 | 0 |
| 446 | 0 | 2 | 3 | 2 | 2 | 50  | 1 | 0 | 0 | 0 |
| 447 | 0 | 1 | 2 | 2 | 1 | 45  | 1 | 0 | 0 | 0 |
| 448 | 0 | 1 | 3 | 2 | 2 | 70  | 1 | 0 | 0 | 0 |
| 449 | 0 | 1 | 4 | 2 | 3 | 95  | 1 | 0 | 0 | 0 |
| 450 | 0 | 3 | 3 | 2 | 2 | 75  | 1 | 0 | 0 | 1 |
| 451 | 0 | 1 | 1 | 2 | 2 | 50  | 1 | 0 | 0 | 0 |
| 452 | 0 | 3 | 3 | 2 | 2 | 70  | 1 | 0 | 0 | 1 |
| 453 | 0 | 3 | 6 | 2 | 2 | 50  | 1 | 0 | 0 | 1 |
| 454 | 0 | 1 | 5 | 2 | 1 | 55  | 1 | 0 | 0 | 1 |
| 455 | 0 | 2 | 4 | 2 | 2 | 100 | 1 | 0 | 0 | 0 |
| 456 | 0 | 0 | 3 | 1 | 2 | 100 | 1 | 0 | 0 | 1 |
| 457 | 0 | 1 | 0 | 2 | 2 | 60  | 1 | 0 | 0 | 0 |
| 458 | 0 | 2 | 4 | 2 | 2 | 65  | 1 | 0 | 0 | 0 |
| 459 | 0 | 2 | 6 | 2 | 2 | 50  | 1 | 0 | 0 | 0 |
| 460 | 0 | 3 | 3 | 2 | 2 | 50  | 1 | 0 | 0 | 0 |

|     |   |   |   |   |   |     |   |   |   |   |
|-----|---|---|---|---|---|-----|---|---|---|---|
| 461 | 0 | 4 | 4 | 2 | 3 | 50  | 1 | 0 | 0 | 0 |
| 462 | 0 | 2 | 4 | 2 | 3 | 70  | 1 | 0 | 0 | 0 |
| 463 | 0 | 0 | 3 | 1 | 1 | 80  | 1 | 0 | 0 | 1 |
| 464 | 0 | 0 | 0 | 1 | 1 | 70  | 0 | 0 | 0 | 1 |
| 465 | 0 | 2 | 6 | 2 | 3 | 50  | 1 | 0 | 0 | 0 |
| 466 | 0 | 1 | 4 | 3 | 1 | 50  | 0 | 0 | 0 | 0 |
| 467 | 0 | 2 | 5 | 3 | 3 | 85  | 0 | 0 | 0 | 0 |
| 468 | 0 | 1 | 1 | 2 | 2 | 70  | 1 | 0 | 0 | 0 |
| 469 | 0 | 2 | 3 | 2 | 2 | 50  | 1 | 0 | 0 | 0 |
| 470 | 1 | 2 | 3 | 2 | 2 | 50  | 1 | 0 | 0 | 0 |
| 471 | 0 | 1 | 3 | 2 | 1 | 90  | 1 | 0 | 0 | 0 |
| 472 | 0 | 3 | 2 | 1 | 1 | 70  | 1 | 1 | 0 | 0 |
| 473 | 0 | 3 | 5 | 2 | 2 | 70  | 1 | 1 | 0 | 0 |
| 474 | 0 | 0 | 3 | 2 | 2 | 50  | 1 | 0 | 1 | 0 |
| 475 | 0 | 3 | 2 | 2 | 2 | 50  | 1 | 0 | 0 | 0 |
| 476 | 0 | 3 | 2 | 2 | 2 | 70  | 1 | 0 | 0 | 0 |
| 477 | 0 | 1 | 2 | 2 | 2 | 50  | 0 | 0 | 0 | 0 |
| 478 | 0 | 1 | 3 | 1 | 2 | 50  | 1 | 0 | 0 | 0 |
| 479 | 0 | 1 | 4 | 2 | 1 | 95  | 1 | 0 | 0 | 0 |
| 480 | 0 | 1 | 3 | 2 | 2 | 50  | 1 | 0 | 0 | 0 |
| 481 | 0 | 0 | 3 | 1 | 3 | 70  | 1 | 0 | 1 | 0 |
| 482 | 0 | 2 | 6 | 3 | 3 | 50  | 1 | 0 | 0 | 0 |
| 483 | 0 | 4 | 6 | 2 | 3 | 100 | 1 | 1 | 0 | 1 |
| 484 | 0 | 3 | 6 | 2 | 3 | 70  | 1 | 1 | 0 | 0 |
| 485 | 0 | 3 | 1 | 2 | 1 | 5   | 1 | 0 | 0 | 0 |

|     |   |   |   |   |   |     |   |   |   |   |
|-----|---|---|---|---|---|-----|---|---|---|---|
| 486 | 0 | 3 | 4 | 2 | 2 | 65  | 1 | 0 | 0 | 0 |
| 487 | 0 | 2 | 3 | 2 | 1 | 70  | 1 | 0 | 0 | 0 |
| 488 | 0 | 1 | 3 | 2 | 3 | 50  | 1 | 0 | 0 | 0 |
| 489 | 0 | 3 | 4 | 2 | 3 | 70  | 1 | 0 | 0 | 1 |
| 490 | 0 | 1 | 3 | 3 | 3 | 10  | 0 | 0 | 0 | 0 |
| 491 | 0 | 2 | 6 | 2 | 2 | 15  | 0 | 0 | 1 | 0 |
| 492 | 0 | 2 | 7 | 2 | 2 | 50  | 1 | 0 | 0 | 0 |
| 493 | 0 | 1 | 3 | 2 | 2 | 50  | 1 | 0 | 0 | 0 |
| 494 | 0 | 1 | 6 | 2 | 3 | 50  | 1 | 0 | 0 | 0 |
| 495 | 0 | 2 | 3 | 2 | 2 | 50  | 1 | 0 | 1 | 0 |
| 496 | 0 | 3 | 3 | 2 | 2 | 70  | 1 | 0 | 0 | 0 |
| 497 | 0 | 2 | 3 | 2 | 3 | 50  | 1 | 0 | 0 | 0 |
| 498 | 0 | 1 | 6 | 2 | 1 | 50  | 1 | 0 | 0 | 0 |
| 499 | 1 | 2 | 3 | 2 | 2 | 75  | 1 | 0 | 0 | 0 |
| 500 | 0 | 3 | 3 | 2 | 2 | 80  | 1 | 0 | 0 | 0 |
| 501 | 0 | 0 | 2 | 2 | 2 | 80  | 1 | 1 | 0 | 0 |
| 502 | 0 | 1 | 8 | 5 | 1 | 100 | 1 | 0 | 0 | 0 |
| 503 | 0 | 0 | 3 | 2 | 2 | 80  | 1 | 0 | 0 | 0 |
| 504 | 0 | 3 | 4 | 3 | 3 | 85  | 1 | 0 | 0 | 0 |
| 505 | 0 | 3 | 3 | 6 | 2 | 80  | 1 | 0 | 0 | 0 |
| 506 | 0 | 3 | 3 | 2 | 3 | 20  | 1 | 0 | 1 | 1 |
| 507 | 0 | 1 | 6 | 2 | 2 | 25  | 1 | 0 | 0 | 1 |
| 508 | 0 | 3 | 3 | 2 | 2 | 30  | 1 | 0 | 0 | 1 |
| 509 | 0 | 4 | 4 | 2 | 2 | 35  | 1 | 0 | 0 | 0 |
| 510 | 0 | 2 | 4 | 2 | 2 | 100 | 1 | 0 | 0 | 0 |

|     |   |   |   |   |   |     |   |   |   |   |
|-----|---|---|---|---|---|-----|---|---|---|---|
| 511 | 0 | 3 | 3 | 2 | 3 | 55  | 0 | 0 | 0 | 0 |
| 512 | 0 | 2 | 3 | 2 | 2 | 50  | 0 | 0 | 0 | 0 |
| 513 | 0 | 2 | 2 | 2 | 2 | 90  | 1 | 0 | 0 | 0 |
| 514 | 0 | 2 | 2 | 2 | 2 | 95  | 1 | 0 | 0 | 0 |
| 515 | 0 | 2 | 6 | 2 | 3 | 50  | 0 | 0 | 0 | 1 |
| 516 | 0 | 1 | 6 | 3 | 2 | 100 | 0 | 0 | 0 | 0 |
| 517 | 0 | 2 | 3 | 2 | 3 | 50  | 0 | 0 | 0 | 0 |
| 518 | 0 | 3 | 2 | 2 | 1 | 50  | 1 | 0 | 0 | 0 |
| 519 | 1 | 2 | 2 | 2 | 1 | 65  | 1 | 0 | 0 | 0 |
| 520 | 1 | 2 | 3 | 2 | 2 | 50  | 1 | 0 | 0 | 1 |
| 521 | 0 | 2 | 3 | 2 | 2 | 50  | 1 | 0 | 0 | 0 |
| 522 | 0 | 2 | 6 | 2 | 3 | 70  | 1 | 1 | 1 | 0 |
| 523 | 0 | 2 | 3 | 2 | 2 | 5   | 1 | 0 | 0 | 0 |
| 524 | 0 | 2 | 3 | 2 | 3 | 65  | 1 | 0 | 1 | 0 |
| 525 | 0 | 2 | 6 | 2 | 2 | 90  | 1 | 0 | 0 | 0 |
| 526 | 0 | 3 | 3 | 2 | 2 | 70  | 1 | 0 | 0 | 0 |
| 527 | 0 | 4 | 5 | 2 | 2 | 10  | 1 | 0 | 1 | 0 |
| 528 | 0 | 2 | 3 | 2 | 2 | 60  | 1 | 0 | 0 | 0 |
| 529 | 0 | 2 | 4 | 2 | 2 | 50  | 1 | 0 | 0 | 0 |
| 530 | 0 | 0 | 2 | 3 | 2 | 60  | 1 | 0 | 0 | 0 |
| 531 | 0 | 1 | 3 | 2 | 2 | 100 | 1 | 0 | 0 | 1 |
| 532 | 0 | 1 | 3 | 2 | 2 | 40  | 1 | 0 | 0 | 1 |
| 533 | 0 | 2 | 3 | 2 | 2 | 60  | 0 | 0 | 0 | 0 |
| 534 | 0 | 2 | 3 | 2 | 2 | 50  | 1 | 0 | 0 | 0 |
| 535 | 0 | 0 | 4 | 2 | 2 | 50  | 1 | 0 | 1 | 0 |

|     |   |   |   |   |   |     |   |   |   |   |
|-----|---|---|---|---|---|-----|---|---|---|---|
| 536 | 0 | 0 | 0 | 2 | 2 | 65  | 1 | 0 | 0 | 0 |
| 537 | 1 | 2 | 3 | 2 | 3 | 50  | 1 | 0 | 0 | 0 |
| 538 | 0 | 1 | 1 | 2 | 2 | 50  | 1 | 0 | 0 | 0 |
| 539 | 0 | 0 | 2 | 2 | 2 | 70  | 1 | 0 | 0 | 0 |
| 540 | 0 | 3 | 3 | 2 | 3 | 40  | 1 | 0 | 0 | 0 |
| 541 | 0 | 0 | 5 | 2 | 2 | 100 | 1 | 1 | 1 | 0 |
| 542 | 0 | 1 | 4 | 2 | 3 | 50  | 1 | 0 | 0 | 0 |
| 543 | 0 | 1 | 5 | 1 | 3 | 70  | 1 | 1 | 0 | 0 |
| 544 | 0 | 3 | 0 | 0 | 2 | 40  | 0 | 1 | 1 | 0 |
| 545 | 0 | 2 | 3 | 2 | 2 | 15  | 1 | 0 | 0 | 1 |
| 546 | 0 | 2 | 2 | 2 | 3 | 50  | 1 | 1 | 0 | 0 |
| 547 | 0 | 1 | 3 | 2 | 3 | 50  | 1 | 0 | 0 | 1 |
| 548 | 0 | 0 | 3 | 2 | 3 | 50  | 1 | 0 | 0 | 0 |
| 549 | 0 | 3 | 3 | 1 | 1 | 85  | 1 | 1 | 0 | 0 |
| 550 | 0 | 1 | 3 | 2 | 3 | 50  | 1 | 0 | 0 | 0 |
| 551 | 0 | 1 | 2 | 2 | 3 | 60  | 1 | 0 | 0 | 0 |
| 552 | 0 | 1 | 5 | 3 | 3 | 60  | 1 | 0 | 0 | 1 |
| 553 | 0 | 1 | 2 | 2 | 3 | 50  | 0 | 1 | 0 | 0 |
| 554 | 0 | 2 | 7 | 2 | 3 | 20  | 1 | 0 | 0 | 1 |
| 555 | 0 | 1 | 8 | 2 | 2 | 70  | 1 | 0 | 0 | 1 |
| 556 | 0 | 3 | 3 | 0 | 2 | 50  | 1 | 0 | 0 | 0 |
| 557 | 0 | 1 | 5 | 2 | 3 | 50  | 1 | 0 | 0 | 0 |
| 558 | 0 | 1 | 3 | 2 | 3 | 25  | 1 | 0 | 0 | 0 |
| 559 | 0 | 2 | 6 | 2 | 3 | 70  | 1 | 0 | 0 | 0 |
| 560 | 0 | 2 | 3 | 2 | 3 | 50  | 1 | 0 | 0 | 0 |

|     |   |   |   |   |   |     |   |   |   |   |
|-----|---|---|---|---|---|-----|---|---|---|---|
| 561 | 0 | 2 | 4 | 2 | 3 | 90  | 1 | 0 | 0 | 0 |
| 562 | 0 | 3 | 3 | 2 | 3 | 35  | 0 | 1 | 0 | 0 |
| 563 | 0 | 3 | 3 | 2 | 3 | 45  | 1 | 1 | 0 | 1 |
| 564 | 0 | 1 | 6 | 2 | 2 | 70  | 1 | 0 | 0 | 0 |
| 565 | 0 | 3 | 3 | 2 | 2 | 75  | 1 | 0 | 0 | 0 |
| 566 | 0 | 1 | 1 | 1 | 3 | 50  | 1 | 0 | 0 | 0 |
| 567 | 0 | 2 | 3 | 3 | 3 | 70  | 1 | 0 | 0 | 0 |
| 568 | 0 | 2 | 3 | 3 | 3 | 70  | 1 | 1 | 0 | 0 |
| 569 | 0 | 2 | 4 | 2 | 2 | 80  | 1 | 0 | 1 | 0 |
| 570 | 0 | 2 | 5 | 2 | 2 | 50  | 1 | 0 | 0 | 0 |
| 571 | 1 | 2 | 3 | 2 | 4 | 70  | 1 | 0 | 1 | 0 |
| 572 | 0 | 1 | 4 | 2 | 1 | 85  | 1 | 0 | 0 | 0 |
| 573 | 0 | 3 | 3 | 2 | 3 | 65  | 0 | 0 | 0 | 1 |
| 574 | 0 | 3 | 2 | 1 | 2 | 90  | 0 | 0 | 0 | 1 |
| 575 | 0 | 2 | 3 | 2 | 3 | 50  | 0 | 0 | 0 | 0 |
| 576 | 0 | 1 | 3 | 2 | 1 | 90  | 1 | 0 | 0 | 0 |
| 577 | 0 | 1 | 2 | 1 | 1 | 100 | 1 | 0 | 0 | 0 |
| 578 | 0 | 3 | 4 | 2 | 3 | 30  | 1 | 0 | 0 | 0 |
| 579 | 0 | 2 | 3 | 1 | 2 | 50  | 1 | 0 | 1 | 0 |
| 580 | 0 | 0 | 3 | 2 | 3 | 55  | 1 | 0 | 0 | 0 |
| 581 | 0 | 1 | 3 | 2 | 3 | 55  | 1 | 0 | 0 | 0 |
| 582 | 0 | 3 | 3 | 2 | 2 | 50  | 0 | 0 | 0 | 0 |
| 583 | 0 | 2 | 3 | 2 | 2 | 70  | 0 | 0 | 0 | 0 |
| 584 | 0 | 4 | 3 | 1 | 2 | 50  | 1 | 0 | 0 | 0 |
| 585 | 0 | 2 | 3 | 2 | 3 | 50  | 1 | 1 | 0 | 0 |



|     |   |   |   |   |   |     |   |   |   |   |
|-----|---|---|---|---|---|-----|---|---|---|---|
| 586 | 0 | 1 | 4 | 2 | 2 | 70  | 1 | 0 | 0 | 0 |
| 587 | 0 | 0 | 7 | 2 | 3 | 30  | 1 | 0 | 0 | 0 |
| 588 | 0 | 1 | 3 | 1 | 3 | 50  | 1 | 0 | 0 | 0 |
| 589 | 0 | 3 | 6 | 2 | 3 | 50  | 1 | 0 | 0 | 1 |
| 590 | 0 | 2 | 3 | 2 | 2 | 75  | 0 | 0 | 0 | 0 |
| 591 | 1 | 3 | 1 | 2 | 4 | 50  | 0 | 0 | 1 | 0 |
| 592 | 0 | 0 | 0 | 2 | 3 | 100 | 0 | 0 | 0 | 0 |
| 593 | 0 | 1 | 1 | 2 | 2 | 50  | 1 | 0 | 0 | 1 |
| 594 | 0 | 1 | 5 | 2 | 2 | 90  | 1 | 0 | 0 | 1 |
| 595 | 0 | 3 | 5 | 2 | 2 | 50  | 1 | 0 | 0 | 0 |
| 596 | 0 | 3 | 5 | 2 | 2 | 60  | 1 | 0 | 1 | 0 |
| 597 | 1 | 3 | 2 | 2 | 3 | 55  | 1 | 0 | 0 | 0 |
| 598 | 0 | 2 | 2 | 2 | 3 | 70  | 1 | 0 | 0 | 0 |
| 599 | 0 | 0 | 0 | 2 | 2 | 70  | 1 | 0 | 0 | 0 |
| 600 | 1 | 2 | 0 | 2 | 2 | 90  | 1 | 0 | 0 | 0 |
| 601 | 0 | 1 | 1 | 2 | 2 | 50  | 1 | 0 | 1 | 0 |
| 602 | 0 | 3 | 0 | 1 | 3 | 25  | 1 | 0 | 0 | 1 |
| 603 | 0 | 1 | 0 | 2 | 2 | 30  | 1 | 0 | 1 | 1 |
| 604 | 0 | 0 | 1 | 1 | 2 | 50  | 1 | 0 | 0 | 0 |
| 605 | 1 | 0 | 0 | 2 | 2 | 70  | 1 | 0 | 0 | 0 |
| 606 | 0 | 3 | 3 | 2 | 2 | 70  | 1 | 0 | 0 | 0 |
| 607 | 0 | 2 | 3 | 2 | 2 | 50  | 1 | 0 | 0 | 0 |
| 608 | 0 | 0 | 6 | 0 | 1 | 100 | 0 | 0 | 0 | 1 |
| 609 | 1 | 2 | 3 | 2 | 3 | 50  | 1 | 0 | 0 | 0 |
| 610 | 1 | 3 | 1 | 1 | 3 | 35  | 1 | 0 | 0 | 0 |

|     |   |   |   |   |   |     |   |   |   |   |
|-----|---|---|---|---|---|-----|---|---|---|---|
| 611 | 0 | 1 | 5 | 2 | 2 | 50  | 1 | 0 | 1 | 0 |
| 612 | 0 | 4 | 3 | 2 | 5 | 90  | 1 | 0 | 0 | 0 |
| 613 | 0 | 2 | 3 | 2 | 2 | 75  | 1 | 0 | 0 | 1 |
| 614 | 1 | 2 | 2 | 1 | 3 | 50  | 1 | 0 | 0 | 0 |
| 615 | 0 | 1 | 4 | 2 | 3 | 80  | 1 | 0 | 0 | 0 |
| 616 | 0 | 2 | 3 | 2 | 3 | 40  | 1 | 1 | 1 | 0 |
| 617 | 0 | 1 | 4 | 2 | 1 | 70  | 1 | 0 | 1 | 0 |
| 618 | 0 | 1 | 2 | 2 | 2 | 90  | 1 | 0 | 0 | 0 |
| 619 | 0 | 1 | 5 | 2 | 2 | 55  | 1 | 0 | 0 | 0 |
| 620 | 0 | 4 | 2 | 2 | 3 | 15  | 1 | 1 | 1 | 1 |
| 621 | 0 | 1 | 3 | 2 | 3 | 70  | 1 | 0 | 1 | 0 |
| 622 | 0 | 2 | 7 | 2 | 2 | 80  | 1 | 0 | 0 | 0 |
| 623 | 0 | 2 | 5 | 2 | 2 | 5   | 1 | 0 | 0 | 0 |
| 624 | 0 | 1 | 2 | 2 | 2 | 60  | 1 | 0 | 0 | 0 |
| 625 | 0 | 4 | 2 | 2 | 2 | 40  | 1 | 1 | 1 | 1 |
| 626 | 0 | 3 | 6 | 2 | 2 | 50  | 1 | 0 | 0 | 0 |
| 627 | 0 | 1 | 3 | 2 | 3 | 30  | 1 | 0 | 0 | 0 |
| 628 | 0 | 3 | 3 | 2 | 3 | 30  | 0 | 1 | 1 | 0 |
| 629 | 0 | 2 | 2 | 1 | 2 | 85  | 1 | 0 | 0 | 0 |
| 630 | 0 | 1 | 4 | 1 | 2 | 80  | 1 | 0 | 0 | 0 |
| 631 | 0 | 3 | 3 | 2 | 2 | 90  | 1 | 0 | 0 | 1 |
| 632 | 0 | 4 | 4 | 2 | 1 | 50  | 1 | 0 | 0 | 0 |
| 633 | 0 | 1 | 3 | 2 | 2 | 70  | 1 | 0 | 1 | 1 |
| 634 | 0 | 1 | 2 | 2 | 2 | 50  | 1 | 0 | 0 | 0 |
| 635 | 0 | 1 | 5 | 2 | 1 | 100 | 1 | 0 | 0 | 0 |

|     |   |   |   |   |   |     |   |   |   |   |
|-----|---|---|---|---|---|-----|---|---|---|---|
| 636 | 0 | 3 | 2 | 2 | 3 | 50  | 1 | 0 | 0 | 0 |
| 637 | 0 | 3 | 2 | 3 | 1 | 70  | 1 | 0 | 1 | 1 |
| 638 | 0 | 2 | 6 | 2 | 4 | 80  | 1 | 0 | 0 | 0 |
| 639 | 0 | 2 | 3 | 2 | 2 | 60  | 1 | 0 | 0 | 0 |
| 640 | 0 | 0 | 0 | 3 | 1 | 65  | 0 | 0 | 0 | 0 |
| 641 | 0 | 2 | 8 | 2 | 1 | 95  | 1 | 0 | 0 | 0 |
| 642 | 0 | 1 | 1 | 2 | 1 | 80  | 1 | 0 | 0 | 0 |
| 643 | 0 | 2 | 2 | 2 | 1 | 55  | 1 | 0 | 0 | 0 |
| 644 | 0 | 0 | 0 | 2 | 3 | 100 | 1 | 0 | 0 | 0 |
| 645 | 0 | 1 | 2 | 2 | 1 | 95  | 1 | 1 | 0 | 0 |
| 646 | 0 | 3 | 6 | 2 | 2 | 50  | 1 | 0 | 1 | 1 |
| 647 | 1 | 3 | 5 | 2 | 2 | 70  | 1 | 0 | 1 | 0 |
| 648 | 0 | 3 | 5 | 2 | 2 | 40  | 1 | 1 | 1 | 0 |
| 649 | 0 | 2 | 3 | 2 | 2 | 30  | 1 | 0 | 0 | 0 |
| 650 | 0 | 1 | 3 | 2 | 2 | 100 | 1 | 0 | 0 | 0 |
| 651 | 0 | 1 | 7 | 2 | 2 | 70  | 1 | 0 | 1 | 0 |
| 652 | 0 | 1 | 3 | 2 | 3 | 80  | 1 | 0 | 0 | 0 |
| 653 | 0 | 3 | 3 | 2 | 3 | 30  | 1 | 1 | 0 | 0 |
| 654 | 0 | 2 | 5 | 2 | 2 | 35  | 1 | 0 | 0 | 0 |
| 655 | 0 | 0 | 2 | 2 | 3 | 80  | 1 | 0 | 0 | 0 |
| 656 | 0 | 2 | 4 | 2 | 2 | 75  | 1 | 0 | 0 | 0 |
| 657 | 0 | 0 | 3 | 2 | 2 | 95  | 1 | 0 | 0 | 0 |
| 658 | 0 | 1 | 5 | 2 | 2 | 90  | 1 | 0 | 0 | 0 |
| 659 | 0 | 2 | 6 | 2 | 2 | 65  | 1 | 0 | 0 | 0 |
| 660 | 1 | 3 | 5 | 2 | 3 | 55  | 1 | 0 | 0 | 0 |

|     |   |   |   |   |   |     |   |   |   |   |
|-----|---|---|---|---|---|-----|---|---|---|---|
| 661 | 0 | 2 | 2 | 2 | 2 | 85  | 1 | 0 | 0 | 0 |
| 662 | 0 | 1 | 3 | 2 | 2 | 100 | 1 | 0 | 0 | 0 |
| 663 | 0 | 2 | 5 | 2 | 3 | 20  | 1 | 0 | 0 | 0 |
| 664 | 0 | 2 | 3 | 2 | 2 | 40  | 1 | 0 | 0 | 0 |
| 665 | 0 | 0 | 3 | 2 | 2 | 50  | 1 | 0 | 0 | 0 |
| 666 | 0 | 3 | 3 | 2 | 3 | 60  | 1 | 0 | 0 | 0 |
| 667 | 0 | 2 | 4 | 2 | 2 | 85  | 1 | 0 | 0 | 0 |
| 668 | 0 | 1 | 3 | 2 | 2 | 45  | 1 | 0 | 0 | 0 |
| 669 | 0 | 1 | 6 | 2 | 2 | 65  | 1 | 1 | 0 | 0 |
| 670 | 0 | 3 | 3 | 2 | 2 | 60  | 1 | 0 | 0 | 1 |
| 671 | 0 | 1 | 1 | 2 | 2 | 60  | 1 | 1 | 0 | 0 |
| 672 | 1 | 0 | 2 | 2 | 2 | 90  | 1 | 1 | 0 | 0 |
| 673 | 0 | 3 | 3 | 2 | 2 | 80  | 1 | 0 | 0 | 0 |
| 674 | 1 | 0 | 2 | 2 | 2 | 70  | 1 | 0 | 0 | 0 |
| 675 | 0 | 1 | 4 | 4 | 2 | 100 | 1 | 0 | 0 | 1 |
| 676 | 1 | 0 | 3 | 2 | 2 | 75  | 1 | 0 | 0 | 0 |
| 677 | 0 | 2 | 3 | 2 | 2 | 80  | 1 | 0 | 0 | 0 |
| 678 | 0 | 3 | 3 | 2 | 3 | 70  | 1 | 0 | 0 | 0 |
| 679 | 0 | 1 | 1 | 2 | 2 | 100 | 1 | 0 | 0 | 0 |
| 680 | 0 | 1 | 3 | 2 | 2 | 85  | 1 | 0 | 1 | 0 |
| 681 | 0 | 1 | 6 | 2 | 2 | 50  | 1 | 0 | 0 | 0 |
| 682 | 0 | 3 | 2 | 2 | 1 | 35  | 1 | 0 | 0 | 0 |
| 683 | 0 | 2 | 2 | 2 | 2 | 60  | 1 | 0 | 0 | 1 |
| 684 | 0 | 1 | 5 | 2 | 4 | 50  | 1 | 0 | 0 | 0 |
| 685 | 0 | 1 | 6 | 2 | 1 | 70  | 1 | 0 | 0 | 0 |

|     |   |   |   |   |   |     |   |   |   |   |
|-----|---|---|---|---|---|-----|---|---|---|---|
| 686 | 0 | 1 | 5 | 2 | 2 | 70  | 1 | 0 | 0 | 0 |
| 687 | 0 | 2 | 5 | 2 | 3 | 50  | 1 | 0 | 0 | 0 |
| 688 | 0 | 1 | 5 | 2 | 2 | 80  | 1 | 0 | 0 | 0 |
| 689 | 0 | 1 | 3 | 2 | 2 | 85  | 1 | 0 | 1 | 1 |
| 690 | 1 | 3 | 2 | 3 | 2 | 50  | 1 | 0 | 0 | 0 |
| 691 | 0 | 3 | 7 | 2 | 2 | 100 | 1 | 0 | 0 | 0 |
| 692 | 1 | 2 | 6 | 2 | 3 | 45  | 1 | 0 | 0 | 0 |
| 693 | 0 | 2 | 2 | 2 | 2 | 75  | 1 | 0 | 1 | 0 |
| 694 | 0 | 3 | 6 | 3 | 4 | 30  | 1 | 0 | 0 | 0 |
| 695 | 0 | 3 | 2 | 3 | 3 | 65  | 1 | 0 | 0 | 0 |
| 696 | 0 | 2 | 6 | 2 | 2 | 100 | 1 | 0 | 1 | 0 |
| 697 | 0 | 1 | 4 | 4 | 1 | 95  | 0 | 0 | 0 | 0 |
| 698 | 0 | 1 | 3 | 2 | 2 | 100 | 1 | 0 | 1 | 1 |
| 699 | 0 | 3 | 3 | 2 | 2 | 45  | 1 | 0 | 0 | 0 |
| 700 | 0 | 3 | 4 | 3 | 1 | 70  | 1 | 0 | 0 | 1 |
| 701 | 0 | 2 | 3 | 2 | 2 | 65  | 1 | 0 | 0 | 1 |
| 702 | 1 | 4 | 4 | 3 | 2 | 70  | 1 | 0 | 0 | 1 |
| 703 | 0 | 2 | 5 | 2 | 2 | 70  | 1 | 0 | 0 | 0 |
| 704 | 0 | 2 | 3 | 2 | 2 | 85  | 1 | 0 | 0 | 0 |
| 705 | 0 | 0 | 3 | 2 | 2 | 75  | 1 | 0 | 0 | 0 |
| 706 | 0 | 2 | 2 | 2 | 2 | 40  | 1 | 0 | 1 | 1 |
| 707 | 0 | 2 | 6 | 2 | 1 | 85  | 1 | 0 | 0 | 0 |
| 708 | 0 | 3 | 3 | 2 | 1 | 55  | 1 | 0 | 0 | 0 |
| 709 | 0 | 3 | 4 | 2 | 1 | 90  | 1 | 1 | 0 | 1 |
| 710 | 0 | 3 | 6 | 2 | 3 | 95  | 1 | 1 | 1 | 0 |

|     |   |   |   |   |   |     |    |   |   |   |   |
|-----|---|---|---|---|---|-----|----|---|---|---|---|
| 711 | 0 | 0 | 2 | 1 | 2 | 55  | 1  | 1 | 0 | 0 |   |
| 712 | 0 | 3 | 5 | 2 | 3 | 65  | 1  | 1 | 1 | 1 |   |
| 713 | 0 | 1 | 3 | 2 | 1 | 55  | 1  | 1 | 0 | 0 |   |
| 714 | 1 | 3 | 3 | 2 | 3 | 35  | 1  | 0 | 0 | 1 |   |
| 715 | 0 | 1 | 3 | 2 | 1 | 75  | 1  | 0 | 0 | 0 |   |
| 716 | 0 | 3 | 4 | 3 | 3 | 50  | 1  | 0 | 0 | 0 |   |
| 717 | 0 | 2 | 3 | 2 | 1 | 90  | 1  | 0 | 0 | 0 |   |
| 718 | 0 | 0 | 7 | 2 | 1 | 100 | 1  | 1 | 1 | 0 |   |
| 719 | 0 | 3 | 4 | 2 | 1 | 65  | 1  | 0 | 0 | 0 |   |
| 720 | 0 | 1 | 4 | 2 | 1 | 60  | 1  | 0 | 0 | 1 |   |
| 721 | 0 | 2 | 3 | 2 | 1 | 50  | 1  | 0 | 0 | 1 |   |
| 722 | 0 | 3 | 3 | 2 | 3 | 70  | 1  | 1 | 0 | 0 |   |
| 723 | 0 | 3 | 3 | 2 | 1 | 90  | 1  | 0 | 0 | 0 |   |
| 724 | 0 | 1 | 3 | 2 | 1 | 90  | 1  | 0 | 0 | 1 |   |
| 725 | 0 | 1 | 2 | 3 | 2 | 85  | 1  | 0 | 0 | 0 |   |
| 726 | 0 | 2 | 4 | 2 | 2 | 100 | 1  | 0 | 1 | 0 |   |
| 727 | 0 | 2 | 4 | 2 | 3 | 50  | 1  | 0 | 0 | 1 |   |
| 728 | 0 | 2 | 5 | 2 | 1 | 90  | 1  | 0 | 0 | 0 |   |
| 729 | 0 | 3 | 4 | 2 | 2 | 50  | 1  | 0 | 0 | 1 |   |
| 730 | 0 | 1 | 3 | 2 | 2 | 85  | 1  | 0 | 0 | 0 |   |
| 731 | 0 | 3 | 6 |   | 5 | 1   | 35 | 0 | 0 | 0 | 1 |
| 732 | 0 | 2 | 6 | 2 | 5 | 80  | 1  | 0 | 0 | 0 |   |
| 733 | 1 | 2 | 3 | 2 | 2 | 80  | 1  | 0 | 0 | 1 |   |
| 734 | 0 | 3 | 4 | 2 | 1 | 60  | 1  | 0 | 1 | 0 |   |
| 735 | 0 | 2 | 6 | 2 | 2 | 70  | 1  | 0 | 0 | 1 |   |

|     |   |   |   |   |   |     |   |   |   |   |
|-----|---|---|---|---|---|-----|---|---|---|---|
| 736 | 0 | 2 | 5 | 2 | 2 | 100 | 0 | 0 | 1 | 0 |
| 737 | 0 | 2 | 4 | 1 | 2 | 75  | 1 | 0 | 1 | 0 |
| 738 | 0 | 2 | 5 | 3 | 1 | 80  | 1 | 0 | 0 | 1 |
| 739 | 0 | 1 | 2 | 2 | 1 | 75  | 1 | 0 | 1 | 0 |
| 740 | 0 | 1 | 2 | 2 | 1 | 50  | 1 | 1 | 1 | 0 |
| 741 | 0 | 2 | 4 | 2 | 1 | 100 | 1 | 0 | 0 | 0 |
| 742 | 0 | 3 | 5 | 2 | 1 | 80  | 1 | 1 | 0 | 0 |
| 743 | 0 | 2 | 3 | 2 | 1 | 60  | 1 | 1 | 0 | 0 |
| 744 | 0 | 3 | 0 | 1 | 1 | 25  | 0 | 0 | 1 | 1 |
| 745 | 0 | 1 | 0 | 2 | 1 | 100 | 0 | 0 | 0 | 0 |
| 746 | 0 | 4 | 4 | 2 | 1 | 40  | 1 | 1 | 0 | 0 |
| 747 | 0 | 1 | 3 | 2 | 2 | 100 | 1 | 0 | 1 | 0 |
| 748 | 0 | 1 | 6 | 2 | 1 | 85  | 1 | 0 | 0 | 1 |
| 749 | 0 | 2 | 2 | 2 | 1 | 30  | 1 | 0 | 1 | 0 |
| 750 | 0 | 1 | 5 | 2 | 2 | 85  | 1 | 0 | 0 | 0 |
| 751 | 0 | 1 | 4 | 2 | 2 | 100 | 1 | 0 | 0 | 0 |
| 752 | 0 | 3 | 1 | 2 | 2 | 5   | 1 | 0 | 0 | 0 |
| 753 | 0 | 2 | 5 | 2 | 2 | 85  | 1 | 0 | 1 | 0 |
| 754 | 0 | 1 | 4 | 2 | 1 | 100 | 1 | 1 | 1 | 0 |
| 755 | 1 | 0 | 4 | 2 | 3 | 85  | 1 | 0 | 0 | 0 |
| 756 | 0 | 2 | 1 | 2 | 2 | 70  | 1 | 0 | 0 | 0 |
| 757 | 1 | 0 | 0 | 1 | 2 | 55  | 1 | 0 | 0 | 0 |
| 758 | 0 | 0 | 0 | 0 | 2 | 100 | 0 | 0 | 0 | 0 |
| 759 | 0 | 3 | 4 | 2 | 3 | 60  | 1 | 0 | 0 | 1 |
| 760 | 0 | 4 | 4 | 2 | 3 | 20  | 1 | 1 | 0 | 0 |

|     |   |   |   |   |   |     |   |   |   |   |
|-----|---|---|---|---|---|-----|---|---|---|---|
| 761 | 0 | 2 | 0 | 0 | 1 | 95  | 0 | 0 | 0 | 0 |
| 762 | 0 | 1 | 3 | 2 | 2 | 90  | 1 | 0 | 0 | 1 |
| 763 | 0 | 3 | 0 | 0 | 2 | 0   | 0 | 0 | 1 | 0 |
| 764 | 0 | 2 | 4 | 2 | 2 | 70  | 1 | 0 | 0 | 1 |
| 765 | 0 | 3 | 5 | 1 | 1 | 100 | 1 | 0 | 0 | 0 |
| 766 | 0 | 2 | 1 | 1 | 3 | 70  | 0 | 1 | 0 | 0 |
| 767 | 0 | 0 | 0 | 0 | 2 | 100 | 0 | 0 | 1 | 0 |
| 768 | 0 | 3 | 4 | 2 | 2 | 40  | 1 | 0 | 0 | 1 |
| 769 | 0 | 1 | 1 | 1 | 2 | 50  | 1 | 0 | 0 | 0 |
| 770 | 0 | 1 | 5 | 2 | 1 | 85  | 1 | 0 | 0 | 0 |
| 771 | 0 | 1 | 2 | 2 | 1 | 70  | 1 | 0 | 1 | 1 |
| 772 | 0 | 1 | 3 | 2 | 2 | 90  | 1 | 0 | 0 | 0 |
| 773 | 0 | 1 | 0 | 0 | 1 | 80  | 0 | 0 | 0 | 0 |
| 774 | 0 | 2 | 4 | 2 | 2 | 65  | 1 | 0 | 0 | 0 |
| 775 | 0 | 1 | 4 | 2 | 3 | 85  | 1 | 0 | 0 | 0 |
| 776 | 0 | 1 | 0 | 0 | 1 | 100 | 0 | 0 | 0 | 0 |
| 777 | 0 | 3 | 3 | 2 | 2 | 95  | 1 | 1 | 0 | 1 |
| 778 | 0 | 1 | 4 | 2 | 1 | 90  | 1 | 0 | 0 | 0 |
| 779 | 0 | 2 | 4 | 2 | 1 | 55  | 1 | 1 | 1 | 0 |
| 780 | 0 | 2 | 4 | 2 | 2 | 75  | 1 | 0 | 0 | 0 |
| 781 | 0 | 3 | 4 | 2 | 1 | 95  | 1 | 1 | 0 | 1 |
| 782 | 0 | 1 | 4 | 2 | 1 | 85  | 1 | 1 | 0 | 0 |
| 783 | 0 | 1 | 4 | 3 | 1 | 60  | 1 | 0 | 1 | 0 |
| 784 | 1 | 2 | 4 | 3 | 1 | 90  | 1 | 0 | 0 | 0 |
| 785 | 0 | 3 | 6 | 2 | 1 | 50  | 1 | 0 | 0 | 0 |



|     |   |   |   |   |   |     |   |   |   |   |
|-----|---|---|---|---|---|-----|---|---|---|---|
| 786 | 0 | 3 | 6 | 0 | 2 | 45  | 1 | 0 | 0 | 1 |
| 787 | 0 | 3 | 4 | 2 | 1 | 60  | 1 | 0 | 1 | 0 |
| 788 | 0 | 1 | 0 | 0 | 1 | 100 | 1 | 0 | 1 | 0 |
| 789 | 0 | 3 | 4 | 2 | 1 | 80  | 1 | 0 | 0 | 1 |
| 790 | 0 | 4 | 4 | 2 | 4 | 60  | 0 | 0 | 0 | 0 |
| 791 | 0 | 2 | 0 | 0 | 2 | 45  | 0 | 0 | 0 | 0 |
| 792 | 0 | 3 | 6 | 2 | 2 | 45  | 1 | 0 | 0 | 0 |
| 793 | 1 | 2 | 3 | 2 | 3 | 95  | 1 | 0 | 0 | 0 |
| 794 | 0 | 4 | 5 | 2 | 2 | 55  | 1 | 1 | 1 | 0 |
| 795 | 0 | 2 | 5 | 2 | 3 | 60  | 1 | 0 | 0 | 1 |
| 796 | 0 | 3 | 4 | 2 | 3 | 85  | 1 | 0 | 1 | 0 |
| 797 | 0 | 1 | 4 | 2 | 1 | 75  | 1 | 0 | 1 | 0 |
| 798 | 0 | 2 | 4 | 2 | 1 | 75  | 1 | 0 | 0 | 0 |

| number | Bloating | edema | Anorexia | Sleep disorder | Constipation | Fatigue | total symptoms number |
|--------|----------|-------|----------|----------------|--------------|---------|-----------------------|
| 1      | 0        | 0     | 0        | 0              | 0            | 0       | 4                     |
| 2      | 1        | 0     | 0        | 0              | 0            | 1       | 8                     |
| 3      | 0        | 0     | 0        | 0              | 1            | 1       | 6                     |
| 4      | 0        | 0     | 1        | 1              | 1            | 0       | 8                     |
| 5      | 0        | 0     | 0        | 1              | 0            | 1       | 6                     |
| 6      | 0        | 0     | 0        | 0              | 0            | 1       | 8                     |
| 7      | 0        | 0     | 1        | 1              | 1            | 0       | 11                    |
| 8      | 1        | 0     | 1        | 1              | 1            | 1       | 9                     |

|    |   |   |   |   |   |   |    |
|----|---|---|---|---|---|---|----|
| 9  | 0 | 0 | 0 | 0 | 0 | 0 | 8  |
| 10 | 0 | 0 | 0 | 0 | 0 | 1 | 6  |
| 11 | 0 | 0 | 0 | 0 | 1 | 0 | 9  |
| 12 | 0 | 0 | 1 | 1 | 0 | 0 | 5  |
| 13 | 0 | 0 | 0 | 0 | 0 | 0 | 5  |
| 14 | 0 | 0 | 0 | 0 | 0 | 1 | 4  |
| 15 | 0 | 0 | 0 | 1 | 1 | 0 | 4  |
| 16 | 0 | 0 | 0 | 0 | 0 | 0 | 6  |
| 17 | 0 | 0 | 1 | 0 | 1 | 0 | 9  |
| 18 | 1 | 0 | 1 | 1 | 0 | 1 | 11 |
| 19 | 0 | 0 | 1 | 1 | 0 | 0 | 10 |
| 20 | 0 | 0 | 0 | 0 | 0 | 0 | 5  |
| 21 | 0 | 1 | 1 | 1 | 1 | 0 | 11 |
| 22 | 1 | 1 | 1 | 1 | 1 | 0 | 10 |
| 23 | 0 | 0 | 1 | 1 | 0 | 0 | 6  |
| 24 | 0 | 0 | 1 | 1 | 0 | 0 | 4  |
| 25 | 0 | 1 | 1 | 0 | 1 | 1 | 11 |
| 26 | 0 | 0 | 0 | 1 | 0 | 0 | 5  |
| 27 | 0 | 0 | 1 | 0 | 1 | 1 | 9  |
| 28 | 0 | 0 | 1 | 1 | 0 | 1 | 13 |
| 29 | 1 | 0 | 1 | 0 | 1 | 0 | 8  |
| 30 | 0 | 0 | 1 | 1 | 0 | 1 | 9  |
| 31 | 0 | 0 | 1 | 1 | 0 | 0 | 4  |
| 32 | 0 | 0 | 1 | 1 | 0 | 1 | 8  |
| 33 | 0 | 0 | 1 | 0 | 0 | 0 | 5  |

|    |   |   |   |   |   |   |    |
|----|---|---|---|---|---|---|----|
| 34 | 0 | 0 | 1 | 0 | 1 | 1 | 7  |
| 35 | 0 | 0 | 1 | 0 | 0 | 0 | 5  |
| 36 | 0 | 0 | 0 | 0 | 1 | 0 | 5  |
| 37 | 1 | 0 | 1 | 1 | 0 | 1 | 11 |
| 38 | 0 | 1 | 1 | 1 | 1 | 1 | 12 |
| 39 | 0 | 1 | 1 | 1 | 0 | 0 | 7  |
| 40 | 0 | 0 | 0 | 0 | 0 | 0 | 5  |
| 41 | 1 | 0 | 0 | 0 | 0 | 0 | 3  |
| 42 | 1 | 1 | 1 | 1 | 0 | 1 | 9  |
| 43 | 1 | 0 | 0 | 0 | 1 | 1 | 6  |
| 44 | 1 | 0 | 1 | 1 | 0 | 1 | 9  |
| 45 | 0 | 0 | 1 | 1 | 0 | 1 | 10 |
| 46 | 0 | 0 | 1 | 0 | 0 | 0 | 6  |
| 47 | 1 | 1 | 0 | 0 | 1 | 0 | 8  |
| 48 | 0 | 0 | 0 | 0 | 0 | 0 | 5  |
| 49 | 0 | 0 | 1 | 1 | 1 | 0 | 5  |
| 50 | 0 | 1 | 1 | 1 | 0 | 0 | 6  |
| 51 | 0 | 0 | 1 | 0 | 1 | 0 | 13 |
| 52 | 0 | 0 | 1 | 0 | 0 | 0 | 4  |
| 53 | 0 | 0 | 1 | 1 | 1 | 1 | 8  |
| 54 | 0 | 0 | 1 | 1 | 0 | 0 | 5  |
| 55 | 0 | 0 | 1 | 1 | 1 | 1 | 11 |
| 56 | 0 | 0 | 0 | 0 | 1 | 1 | 8  |
| 57 | 1 | 0 | 1 | 1 | 1 | 1 | 9  |
| 58 | 0 | 1 | 0 | 0 | 0 | 1 | 8  |

|    |   |   |   |   |   |   |    |
|----|---|---|---|---|---|---|----|
| 59 | 0 | 1 | 0 | 0 | 0 | 0 | 3  |
| 60 | 0 | 0 | 0 | 0 | 0 | 0 | 3  |
| 61 | 1 | 0 | 0 | 1 | 0 | 1 | 6  |
| 62 | 0 | 0 | 0 | 0 | 0 | 1 | 9  |
| 63 | 1 | 0 | 1 | 0 | 0 | 1 | 10 |
| 64 | 0 | 0 | 1 | 1 | 0 | 1 | 9  |
| 65 | 0 | 0 | 1 | 1 | 0 | 1 | 9  |
| 66 | 0 | 0 | 0 | 0 | 1 | 0 | 5  |
| 67 | 1 | 0 | 0 | 0 | 0 | 0 | 9  |
| 68 | 0 | 0 | 0 | 0 | 1 | 0 | 2  |
| 69 | 0 | 0 | 1 | 1 | 0 | 1 | 10 |
| 70 | 1 | 1 | 0 | 1 | 0 | 1 | 14 |
| 71 | 0 | 0 | 0 | 0 | 0 | 0 | 2  |
| 72 | 0 | 1 | 0 | 0 | 0 | 0 | 1  |
| 73 | 0 | 0 | 0 | 0 | 0 | 0 | 2  |
| 74 | 0 | 0 | 0 | 0 | 1 | 0 | 4  |
| 75 | 1 | 1 | 1 | 0 | 1 | 1 | 11 |
| 76 | 1 | 0 | 1 | 0 | 1 | 1 | 9  |
| 77 | 0 | 1 | 0 | 0 | 0 | 0 | 5  |
| 78 | 0 | 1 | 1 | 1 | 0 | 1 | 13 |
| 79 | 0 | 0 | 0 | 1 | 0 | 1 | 9  |
| 80 | 0 | 0 | 1 | 0 | 1 | 0 | 7  |
| 81 | 0 | 0 | 0 | 1 | 1 | 0 | 4  |
| 82 | 1 | 0 | 0 | 1 | 0 | 1 | 12 |
| 83 | 1 | 0 | 1 | 0 | 0 | 1 | 7  |

|     |   |   |   |   |   |   |    |
|-----|---|---|---|---|---|---|----|
| 84  | 0 | 0 | 0 | 0 | 1 | 0 | 3  |
| 85  | 1 | 0 | 1 | 1 | 0 | 1 | 12 |
| 86  | 0 | 0 | 1 | 0 | 0 | 1 | 6  |
| 87  | 0 | 0 | 0 | 0 | 1 | 1 | 5  |
| 88  | 0 | 0 | 0 | 1 | 0 | 1 | 4  |
| 89  | 0 | 0 | 1 | 0 | 1 | 0 | 7  |
| 90  | 0 | 0 | 0 | 1 | 1 | 1 | 10 |
| 91  | 1 | 0 | 0 | 1 | 1 | 1 | 9  |
| 92  | 1 | 0 | 0 | 0 | 0 | 0 | 2  |
| 93  | 1 | 0 | 1 | 1 | 1 | 0 | 7  |
| 94  | 0 | 0 | 0 | 0 | 0 | 0 | 2  |
| 95  | 0 | 0 | 0 | 1 | 1 | 0 | 3  |
| 96  | 0 | 0 | 0 | 1 | 1 | 1 | 8  |
| 97  | 0 | 0 | 1 | 1 | 0 | 1 | 9  |
| 98  | 0 | 1 | 0 | 0 | 1 | 0 | 6  |
| 99  | 0 | 1 | 1 | 1 | 1 | 1 | 9  |
| 100 | 0 | 0 | 1 | 1 | 0 | 1 | 6  |
| 101 | 1 | 1 | 0 | 0 | 1 | 0 | 6  |
| 102 | 0 | 0 | 0 | 1 | 0 | 0 | 2  |
| 103 | 0 | 1 | 1 | 1 | 1 | 0 | 7  |
| 104 | 1 | 0 | 0 | 1 | 1 | 1 | 12 |
| 105 | 0 | 0 | 1 | 0 | 1 | 1 | 4  |
| 106 | 0 | 0 | 1 | 0 | 1 | 1 | 8  |
| 107 | 0 | 0 | 1 | 1 | 1 | 1 | 7  |
| 108 | 0 | 0 | 1 | 1 | 0 | 1 | 9  |

|     |   |   |   |   |   |   |    |
|-----|---|---|---|---|---|---|----|
| 109 | 0 | 1 | 1 | 1 | 1 | 1 | 10 |
| 110 | 1 | 0 | 0 | 0 | 1 | 1 | 6  |
| 111 | 0 | 1 | 0 | 1 | 0 | 0 | 3  |
| 112 | 1 | 0 | 0 | 0 | 0 | 0 | 3  |
| 113 | 0 | 0 | 0 | 1 | 1 | 1 | 7  |
| 114 | 0 | 0 | 1 | 1 | 0 | 1 | 9  |
| 115 | 1 | 0 | 1 | 1 | 1 | 1 | 9  |
| 116 | 0 | 0 | 0 | 1 | 1 | 1 | 7  |
| 117 | 0 | 0 | 1 | 1 | 0 | 0 | 3  |
| 118 | 1 | 0 | 0 | 1 | 1 | 0 | 7  |
| 119 | 0 | 0 | 0 | 0 | 0 | 0 | 3  |
| 120 | 0 | 0 | 0 | 0 | 0 | 0 | 2  |
| 121 | 0 | 0 | 0 | 0 | 0 | 0 | 1  |
| 122 | 0 | 0 | 0 | 0 | 0 | 1 | 7  |
| 123 | 0 | 0 | 0 | 0 | 0 | 0 | 1  |
| 124 | 0 | 1 | 1 | 0 | 0 | 0 | 10 |
| 125 | 0 | 0 | 0 | 0 | 0 | 0 | 1  |
| 126 | 1 | 1 | 1 | 0 | 0 | 1 | 8  |
| 127 | 0 | 0 | 0 | 0 | 0 | 0 | 5  |
| 128 | 0 | 0 | 0 | 0 | 1 | 1 | 4  |
| 129 | 0 | 0 | 0 | 0 | 0 | 1 | 4  |
| 130 | 0 | 0 | 0 | 0 | 0 | 0 | 2  |
| 131 | 0 | 0 | 1 | 0 | 0 | 1 | 5  |
| 132 | 0 | 0 | 0 | 0 | 1 | 0 | 6  |
| 133 | 0 | 0 | 0 | 0 | 1 | 1 | 4  |

|     |   |   |   |   |   |   |    |
|-----|---|---|---|---|---|---|----|
| 134 | 1 | 0 | 1 | 0 | 0 | 1 | 7  |
| 135 | 1 | 0 | 0 | 0 | 0 | 0 | 2  |
| 136 | 0 | 0 | 0 | 1 | 1 | 0 | 7  |
| 137 | 0 | 0 | 0 | 0 | 0 | 0 | 4  |
| 138 | 0 | 0 | 1 | 0 | 0 | 0 | 6  |
| 139 | 0 | 0 | 1 | 1 | 0 | 0 | 6  |
| 140 | 0 | 0 | 0 | 1 | 1 | 1 | 7  |
| 141 | 0 | 0 | 1 | 1 | 0 | 1 | 6  |
| 142 | 0 | 0 | 1 | 1 | 0 | 0 | 3  |
| 143 | 0 | 0 | 0 | 0 | 0 | 0 | 7  |
| 144 | 1 | 0 | 1 | 1 | 0 | 0 | 5  |
| 145 | 0 | 0 | 0 | 0 | 0 | 0 | 2  |
| 146 | 0 | 0 | 0 | 1 | 0 | 0 | 2  |
| 147 | 0 | 0 | 0 | 0 | 1 | 0 | 5  |
| 148 | 0 | 0 | 0 | 0 | 0 | 0 | 2  |
| 149 | 0 | 0 | 1 | 0 | 1 | 1 | 10 |
| 150 | 0 | 0 | 1 | 1 | 0 | 1 | 9  |
| 151 | 0 | 0 | 0 | 0 | 0 | 0 | 3  |
| 152 | 0 | 0 | 1 | 0 | 0 | 0 | 3  |
| 153 | 0 | 0 | 0 | 0 | 0 | 0 | 3  |
| 154 | 0 | 0 | 1 | 0 | 1 | 1 | 7  |
| 155 | 0 | 0 | 0 | 0 | 0 | 0 | 2  |
| 156 | 0 | 0 | 0 | 0 | 0 | 0 | 2  |
| 157 | 0 | 0 | 1 | 0 | 0 | 0 | 4  |
| 158 | 0 | 0 | 1 | 0 | 0 | 0 | 2  |

|     |   |   |   |   |   |   |   |
|-----|---|---|---|---|---|---|---|
| 159 | 0 | 0 | 0 | 0 | 0 | 0 | 1 |
| 160 | 0 | 0 | 1 | 1 | 0 | 1 | 7 |
| 161 | 0 | 0 | 0 | 0 | 0 | 0 | 2 |
| 162 | 0 | 0 | 1 | 1 | 1 | 0 | 9 |
| 163 | 1 | 0 | 0 | 0 | 1 | 0 | 3 |
| 164 | 0 | 0 | 1 | 0 | 0 | 1 | 7 |
| 165 | 0 | 0 | 1 | 1 | 1 | 1 | 6 |
| 166 | 1 | 0 | 0 | 1 | 0 | 1 | 9 |
| 167 | 1 | 0 | 1 | 1 | 1 | 1 | 7 |
| 168 | 0 | 0 | 1 | 1 | 0 | 0 | 3 |
| 169 | 0 | 0 | 0 | 0 | 0 | 1 | 3 |
| 170 | 0 | 0 | 0 | 1 | 1 | 0 | 4 |
| 171 | 0 | 0 | 0 | 0 | 0 | 0 | 1 |
| 172 | 0 | 0 | 1 | 1 | 0 | 0 | 4 |
| 173 | 0 | 0 | 1 | 1 | 0 | 0 | 7 |
| 174 | 0 | 0 | 1 | 1 | 0 | 0 | 5 |
| 175 | 0 | 0 | 1 | 1 | 0 | 0 | 3 |
| 176 | 0 | 0 | 1 | 0 | 0 | 0 | 3 |
| 177 | 0 | 0 | 0 | 1 | 1 | 0 | 3 |
| 178 | 0 | 0 | 1 | 0 | 0 | 1 | 7 |
| 179 | 0 | 1 | 1 | 0 | 1 | 0 | 8 |
| 180 | 0 | 0 | 0 | 0 | 0 | 0 | 1 |
| 181 | 0 | 0 | 0 | 0 | 0 | 0 | 1 |
| 182 | 0 | 0 | 0 | 0 | 1 | 0 | 2 |
| 183 | 0 | 0 | 0 | 0 | 1 | 0 | 4 |



|     |   |   |   |   |   |   |    |
|-----|---|---|---|---|---|---|----|
| 184 | 0 | 1 | 0 | 0 | 0 | 0 | 2  |
| 185 | 0 | 0 | 0 | 0 | 1 | 0 | 2  |
| 186 | 1 | 0 | 1 | 1 | 0 | 1 | 7  |
| 187 | 0 | 0 | 0 | 0 | 0 | 0 | 3  |
| 188 | 0 | 0 | 0 | 0 | 0 | 0 | 3  |
| 189 | 0 | 0 | 0 | 0 | 1 | 0 | 3  |
| 190 | 0 | 0 | 0 | 0 | 0 | 0 | 3  |
| 191 | 0 | 0 | 1 | 1 | 1 | 0 | 7  |
| 192 | 0 | 0 | 0 | 0 | 0 | 0 | 2  |
| 193 | 0 | 0 | 1 | 0 | 0 | 0 | 3  |
| 194 | 0 | 0 | 0 | 0 | 0 | 0 | 3  |
| 195 | 0 | 0 | 0 | 1 | 0 | 0 | 3  |
| 196 | 0 | 0 | 0 | 0 | 0 | 0 | 2  |
| 197 | 0 | 0 | 0 | 0 | 0 | 0 | 2  |
| 198 | 0 | 0 | 0 | 0 | 0 | 0 | 1  |
| 199 | 1 | 0 | 1 | 1 | 1 | 1 | 10 |
| 200 | 0 | 0 | 0 | 0 | 0 | 0 | 1  |
| 201 | 0 | 0 | 0 | 0 | 0 | 0 | 2  |
| 202 | 0 | 0 | 0 | 0 | 0 | 0 | 5  |
| 203 | 0 | 0 | 1 | 1 | 1 | 1 | 6  |
| 204 | 0 | 0 | 1 | 1 | 0 | 1 | 6  |
| 205 | 0 | 0 | 1 | 0 | 0 | 0 | 3  |
| 206 | 1 | 0 | 0 | 0 | 0 | 0 | 4  |
| 207 | 0 | 0 | 0 | 1 | 0 | 1 | 6  |
| 208 | 0 | 0 | 0 | 0 | 0 | 1 | 3  |

|     |   |   |   |   |   |   |   |
|-----|---|---|---|---|---|---|---|
| 209 | 0 | 0 | 1 | 1 | 0 | 1 | 5 |
| 210 | 0 | 0 | 0 | 0 | 0 | 0 | 1 |
| 211 | 0 | 0 | 1 | 1 | 0 | 1 | 6 |
| 212 | 0 | 0 | 1 | 1 | 0 | 1 | 5 |
| 213 | 1 | 0 | 0 | 1 | 0 | 0 | 5 |
| 214 | 0 | 0 | 1 | 1 | 0 | 1 | 5 |
| 215 | 0 | 0 | 1 | 1 | 1 | 1 | 7 |
| 216 | 0 | 0 | 1 | 1 | 1 | 1 | 7 |
| 217 | 0 | 0 | 1 | 1 | 0 | 1 | 5 |
| 218 | 0 | 0 | 1 | 1 | 1 | 0 | 6 |
| 219 | 0 | 0 | 0 | 0 | 1 | 0 | 3 |
| 220 | 0 | 0 | 1 | 1 | 1 | 1 | 6 |
| 221 | 1 | 0 | 0 | 0 | 0 | 0 | 3 |
| 222 | 0 | 0 | 0 | 0 | 0 | 0 | 1 |
| 223 | 1 | 0 | 0 | 1 | 1 | 1 | 6 |
| 224 | 0 | 0 | 1 | 1 | 1 | 1 | 9 |
| 225 | 0 | 0 | 0 | 1 | 0 | 0 | 2 |
| 226 | 0 | 0 | 1 | 1 | 1 | 0 | 6 |
| 227 | 0 | 0 | 0 | 0 | 1 | 0 | 3 |
| 228 | 0 | 0 | 1 | 0 | 0 | 0 | 3 |
| 229 | 0 | 0 | 0 | 0 | 0 | 0 | 2 |
| 230 | 0 | 0 | 0 | 0 | 1 | 0 | 3 |
| 231 | 0 | 1 | 0 | 1 | 0 | 0 | 3 |
| 232 | 0 | 0 | 0 | 0 | 0 | 0 | 1 |
| 233 | 0 | 0 | 0 | 0 | 0 | 0 | 1 |

|     |   |   |   |   |   |   |   |
|-----|---|---|---|---|---|---|---|
| 234 | 0 | 0 | 0 | 1 | 1 | 1 | 7 |
| 235 | 0 | 0 | 0 | 0 | 0 | 0 | 0 |
| 236 | 0 | 1 | 0 | 1 | 1 | 1 | 7 |
| 237 | 1 | 0 | 0 | 0 | 0 | 0 | 5 |
| 238 | 1 | 0 | 0 | 1 | 0 | 0 | 6 |
| 239 | 0 | 0 | 0 | 0 | 0 | 1 | 3 |
| 240 | 0 | 0 | 0 | 0 | 0 | 0 | 1 |
| 241 | 0 | 0 | 1 | 0 | 0 | 0 | 4 |
| 242 | 0 | 1 | 0 | 0 | 0 | 1 | 6 |
| 243 | 0 | 0 | 0 | 0 | 0 | 0 | 1 |
| 244 | 1 | 0 | 1 | 1 | 0 | 0 | 7 |
| 245 | 0 | 0 | 0 | 0 | 0 | 0 | 1 |
| 246 | 0 | 0 | 0 | 0 | 0 | 0 | 5 |
| 247 | 0 | 0 | 1 | 1 | 0 | 1 | 6 |
| 248 | 0 | 0 | 0 | 0 | 0 | 0 | 2 |
| 249 | 0 | 0 | 0 | 0 | 0 | 0 | 2 |
| 250 | 0 | 0 | 0 | 0 | 0 | 0 | 1 |
| 251 | 0 | 0 | 0 | 0 | 0 | 0 | 3 |
| 252 | 0 | 0 | 0 | 0 | 0 | 1 | 4 |
| 253 | 1 | 1 | 1 | 1 | 0 | 1 | 9 |
| 254 | 0 | 0 | 0 | 0 | 0 | 0 | 5 |
| 255 | 0 | 0 | 0 | 0 | 0 | 0 | 3 |
| 256 | 1 | 1 | 1 | 0 | 1 | 0 | 5 |
| 257 | 0 | 0 | 1 | 0 | 1 | 1 | 6 |
| 258 | 0 | 0 | 1 | 1 | 0 | 0 | 3 |

|     |   |   |   |   |   |   |   |
|-----|---|---|---|---|---|---|---|
| 259 | 0 | 0 | 1 | 1 | 0 | 0 | 3 |
| 260 | 0 | 1 | 1 | 0 | 0 | 1 | 6 |
| 261 | 0 | 0 | 0 | 0 | 0 | 0 | 2 |
| 262 | 0 | 1 | 0 | 0 | 0 | 0 | 3 |
| 263 | 0 | 0 | 1 | 1 | 1 | 1 | 6 |
| 264 | 0 | 0 | 1 | 0 | 0 | 1 | 9 |
| 265 | 0 | 0 | 0 | 0 | 0 | 1 | 2 |
| 266 | 0 | 0 | 1 | 0 | 0 | 1 | 6 |
| 267 | 0 | 0 | 0 | 0 | 0 | 0 | 1 |
| 268 | 0 | 0 | 0 | 0 | 0 | 0 | 4 |
| 269 | 0 | 0 | 0 | 1 | 0 | 0 | 2 |
| 270 | 0 | 0 | 0 | 0 | 1 | 0 | 2 |
| 271 | 0 | 0 | 0 | 1 | 0 | 1 | 4 |
| 272 | 0 | 1 | 1 | 1 | 1 | 1 | 8 |
| 273 | 0 | 0 | 0 | 1 | 0 | 1 | 6 |
| 274 | 0 | 0 | 1 | 1 | 0 | 0 | 4 |
| 275 | 0 | 1 | 1 | 1 | 1 | 1 | 9 |
| 276 | 0 | 0 | 1 | 0 | 0 | 1 | 4 |
| 277 | 0 | 0 | 0 | 0 | 0 | 1 | 3 |
| 278 | 0 | 0 | 1 | 1 | 1 | 1 | 6 |
| 279 | 0 | 0 | 1 | 1 | 0 | 1 | 6 |
| 280 | 0 | 0 | 1 | 1 | 0 | 0 | 4 |
| 281 | 0 | 0 | 0 | 1 | 0 | 0 | 4 |
| 282 | 0 | 0 | 1 | 1 | 0 | 1 | 5 |
| 283 | 0 | 0 | 1 | 1 | 0 | 1 | 5 |

|     |   |   |   |   |   |   |   |
|-----|---|---|---|---|---|---|---|
| 284 | 0 | 0 | 1 | 1 | 0 | 1 | 5 |
| 285 | 0 | 0 | 0 | 0 | 0 | 0 | 1 |
| 286 | 0 | 0 | 1 | 1 | 0 | 1 | 7 |
| 287 | 0 | 0 | 0 | 0 | 1 | 0 | 2 |
| 288 | 0 | 0 | 0 | 0 | 1 | 0 | 3 |
| 289 | 0 | 0 | 0 | 0 | 0 | 0 | 2 |
| 290 | 0 | 0 | 0 | 0 | 1 | 0 | 2 |
| 291 | 0 | 0 | 1 | 0 | 1 | 0 | 4 |
| 292 | 0 | 0 | 1 | 1 | 1 | 1 | 9 |
| 293 | 0 | 0 | 0 | 1 | 1 | 0 | 3 |
| 294 | 0 | 0 | 0 | 1 | 0 | 1 | 3 |
| 295 | 0 | 0 | 0 | 1 | 0 | 1 | 7 |
| 296 | 0 | 0 | 1 | 0 | 1 | 0 | 3 |
| 297 | 0 | 0 | 0 | 0 | 0 | 0 | 3 |
| 298 | 0 | 0 | 0 | 1 | 0 | 0 | 2 |
| 299 | 0 | 0 | 1 | 0 | 0 | 0 | 4 |
| 300 | 0 | 1 | 1 | 0 | 0 | 0 | 5 |
| 301 | 0 | 0 | 0 | 0 | 0 | 0 | 1 |
| 302 | 0 | 0 | 1 | 1 | 1 | 1 | 6 |
| 303 | 0 | 0 | 0 | 0 | 0 | 0 | 2 |
| 304 | 0 | 0 | 1 | 1 | 0 | 1 | 4 |
| 305 | 0 | 0 | 0 | 0 | 1 | 0 | 2 |
| 306 | 0 | 0 | 1 | 1 | 1 | 1 | 5 |
| 307 | 0 | 0 | 1 | 1 | 0 | 0 | 5 |
| 308 | 0 | 0 | 0 | 0 | 0 | 1 | 4 |

|     |   |   |   |   |   |   |   |
|-----|---|---|---|---|---|---|---|
| 309 | 0 | 0 | 1 | 1 | 0 | 0 | 6 |
| 310 | 0 | 0 | 0 | 1 | 0 | 0 | 3 |
| 311 | 0 | 0 | 1 | 1 | 0 | 0 | 4 |
| 312 | 0 | 0 | 1 | 1 | 0 | 0 | 4 |
| 313 | 0 | 0 | 1 | 1 | 0 | 0 | 3 |
| 314 | 0 | 0 | 1 | 0 | 0 | 0 | 2 |
| 315 | 0 | 0 | 0 | 0 | 0 | 0 | 2 |
| 316 | 1 | 0 | 1 | 1 | 1 | 1 | 8 |
| 317 | 0 | 0 | 0 | 1 | 0 | 1 | 5 |
| 318 | 0 | 0 | 1 | 1 | 0 | 1 | 5 |
| 319 | 0 | 0 | 0 | 0 | 0 | 0 | 1 |
| 320 | 0 | 0 | 0 | 0 | 0 | 0 | 1 |
| 321 | 0 | 0 | 1 | 1 | 0 | 0 | 3 |
| 322 | 0 | 0 | 1 | 1 | 1 | 0 | 5 |
| 323 | 0 | 0 | 0 | 0 | 0 | 0 | 1 |
| 324 | 0 | 0 | 1 | 1 | 0 | 1 | 6 |
| 325 | 0 | 0 | 0 | 0 | 0 | 0 | 3 |
| 326 | 0 | 0 | 1 | 1 | 0 | 0 | 6 |
| 327 | 0 | 0 | 0 | 0 | 0 | 0 | 1 |
| 328 | 0 | 0 | 0 | 1 | 0 | 0 | 2 |
| 329 | 0 | 0 | 0 | 0 | 0 | 0 | 2 |
| 330 | 0 | 0 | 0 | 0 | 0 | 0 | 1 |
| 331 | 0 | 0 | 1 | 0 | 0 | 1 | 5 |
| 332 | 0 | 0 | 0 | 0 | 0 | 0 | 3 |
| 333 | 0 | 0 | 1 | 1 | 1 | 0 | 4 |

|     |   |   |   |   |   |   |    |
|-----|---|---|---|---|---|---|----|
| 334 | 0 | 0 | 0 | 0 | 1 | 0 | 2  |
| 335 | 0 | 0 | 1 | 0 | 0 | 0 | 2  |
| 336 | 0 | 1 | 0 | 0 | 1 | 0 | 6  |
| 337 | 0 | 0 | 0 | 0 | 0 | 0 | 2  |
| 338 | 0 | 0 | 1 | 1 | 0 | 0 | 3  |
| 339 | 0 | 0 | 1 | 1 | 1 | 1 | 10 |
| 340 | 0 | 0 | 1 | 0 | 0 | 1 | 5  |
| 341 | 1 | 0 | 1 | 1 | 1 | 1 | 7  |
| 342 | 0 | 0 | 0 | 0 | 0 | 0 | 3  |
| 343 | 0 | 1 | 1 | 0 | 0 | 0 | 3  |
| 344 | 0 | 0 | 0 | 0 | 0 | 0 | 4  |
| 345 | 0 | 0 | 1 | 0 | 0 | 1 | 5  |
| 346 | 0 | 0 | 1 | 0 | 0 | 0 | 2  |
| 347 | 0 | 0 | 1 | 1 | 0 | 1 | 5  |
| 348 | 0 | 0 | 0 | 0 | 0 | 0 | 3  |
| 349 | 0 | 0 | 0 | 0 | 0 | 0 | 3  |
| 350 | 0 | 0 | 1 | 1 | 0 | 0 | 6  |
| 351 | 0 | 0 | 1 | 1 | 0 | 1 | 7  |
| 352 | 0 | 0 | 0 | 0 | 0 | 1 | 2  |
| 353 | 1 | 0 | 1 | 1 | 0 | 0 | 5  |
| 354 | 1 | 1 | 1 | 1 | 1 | 1 | 10 |
| 355 | 0 | 1 | 1 | 1 | 1 | 1 | 7  |
| 356 | 0 | 0 | 1 | 1 | 0 | 1 | 6  |
| 357 | 0 | 0 | 0 | 0 | 0 | 0 | 2  |
| 358 | 0 | 0 | 1 | 1 | 0 | 1 | 6  |

|     |   |   |   |   |   |   |    |
|-----|---|---|---|---|---|---|----|
| 359 | 0 | 0 | 1 | 1 | 1 | 1 | 6  |
| 360 | 1 | 0 | 1 | 1 | 1 | 1 | 9  |
| 361 | 0 | 1 | 1 | 1 | 0 | 1 | 7  |
| 362 | 0 | 0 | 1 | 1 | 0 | 1 | 6  |
| 363 | 0 | 0 | 1 | 1 | 1 | 1 | 7  |
| 364 | 0 | 0 | 1 | 1 | 0 | 0 | 6  |
| 365 | 0 | 0 | 1 | 1 | 1 | 0 | 5  |
| 366 | 0 | 0 | 1 | 1 | 1 | 1 | 7  |
| 367 | 0 | 1 | 0 | 0 | 0 | 0 | 2  |
| 368 | 0 | 0 | 1 | 1 | 1 | 1 | 8  |
| 369 | 0 | 0 | 1 | 1 | 0 | 0 | 4  |
| 370 | 0 | 0 | 0 | 0 | 0 | 0 | 1  |
| 371 | 0 | 0 | 0 | 0 | 0 | 0 | 2  |
| 372 | 0 | 0 | 1 | 1 | 1 | 1 | 6  |
| 373 | 0 | 0 | 0 | 0 | 0 | 0 | 1  |
| 374 | 0 | 0 | 1 | 1 | 0 | 1 | 7  |
| 375 | 1 | 0 | 1 | 1 | 1 | 1 | 10 |
| 376 | 0 | 0 | 0 | 0 | 0 | 0 | 1  |
| 377 | 0 | 0 | 1 | 1 | 1 | 1 | 6  |
| 378 | 0 | 0 | 0 | 0 | 0 | 0 | 1  |
| 379 | 1 | 0 | 1 | 0 | 0 | 1 | 7  |
| 380 | 0 | 0 | 0 | 1 | 0 | 1 | 4  |
| 381 | 0 | 0 | 0 | 0 | 1 | 0 | 2  |
| 382 | 0 | 0 | 1 | 1 | 1 | 0 | 7  |
| 383 | 0 | 1 | 1 | 1 | 0 | 0 | 6  |



|     |   |   |   |   |   |   |   |
|-----|---|---|---|---|---|---|---|
| 384 | 0 | 0 | 0 | 0 | 1 | 0 | 2 |
| 385 | 0 | 0 | 1 | 1 | 0 | 1 | 7 |
| 386 | 0 | 0 | 1 | 1 | 0 | 1 | 6 |
| 387 | 0 | 0 | 0 | 0 | 0 | 0 | 1 |
| 388 | 0 | 0 | 1 | 1 | 0 | 1 | 5 |
| 389 | 0 | 0 | 1 | 0 | 0 | 1 | 5 |
| 390 | 0 | 0 | 0 | 0 | 0 | 0 | 1 |
| 391 | 0 | 0 | 0 | 0 | 0 | 0 | 3 |
| 392 | 0 | 0 | 0 | 0 | 0 | 0 | 4 |
| 393 | 0 | 0 | 1 | 1 | 0 | 0 | 5 |
| 394 | 0 | 0 | 1 | 0 | 0 | 1 | 5 |
| 395 | 0 | 0 | 0 | 0 | 0 | 0 | 2 |
| 396 | 0 | 0 | 0 | 0 | 1 | 0 | 4 |
| 397 | 0 | 0 | 0 | 0 | 0 | 0 | 2 |
| 398 | 0 | 1 | 0 | 0 | 0 | 0 | 2 |
| 399 | 1 | 0 | 1 | 0 | 0 | 1 | 9 |
| 400 | 0 | 0 | 1 | 0 | 0 | 0 | 6 |
| 401 | 0 | 0 | 1 | 1 | 0 | 0 | 3 |
| 402 | 0 | 0 | 0 | 0 | 0 | 0 | 1 |
| 403 | 0 | 0 | 1 | 1 | 0 | 0 | 8 |
| 404 | 0 | 0 | 0 | 1 | 0 | 0 | 2 |
| 405 | 0 | 0 | 0 | 0 | 0 | 0 | 2 |
| 406 | 0 | 0 | 1 | 1 | 0 | 0 | 4 |
| 407 | 0 | 0 | 1 | 1 | 0 | 0 | 5 |
| 408 | 0 | 0 | 0 | 0 | 0 | 0 | 2 |

|     |   |   |   |   |   |   |   |
|-----|---|---|---|---|---|---|---|
| 409 | 0 | 1 | 0 | 0 | 0 | 0 | 3 |
| 410 | 0 | 0 | 1 | 1 | 0 | 0 | 6 |
| 411 | 0 | 0 | 0 | 0 | 0 | 0 | 2 |
| 412 | 0 | 0 | 0 | 0 | 0 | 0 | 2 |
| 413 | 0 | 0 | 0 | 0 | 0 | 0 | 2 |
| 414 | 0 | 0 | 0 | 0 | 0 | 0 | 2 |
| 415 | 0 | 0 | 1 | 1 | 0 | 0 | 3 |
| 416 | 0 | 0 | 1 | 0 | 1 | 0 | 4 |
| 417 | 0 | 0 | 0 | 0 | 0 | 0 | 2 |
| 418 | 0 | 0 | 0 | 0 | 1 | 0 | 2 |
| 419 | 0 | 0 | 0 | 0 | 0 | 0 | 2 |
| 420 | 0 | 0 | 1 | 1 | 0 | 0 | 3 |
| 421 | 1 | 0 | 1 | 1 | 0 | 0 | 5 |
| 422 | 0 | 0 | 1 | 0 | 0 | 0 | 3 |
| 423 | 0 | 0 | 1 | 1 | 0 | 1 | 6 |
| 424 | 0 | 0 | 0 | 0 | 1 | 0 | 2 |
| 425 | 0 | 0 | 1 | 0 | 1 | 0 | 3 |
| 426 | 0 | 0 | 0 | 1 | 0 | 0 | 2 |
| 427 | 0 | 0 | 0 | 0 | 0 | 0 | 3 |
| 428 | 0 | 0 | 0 | 0 | 0 | 0 | 4 |
| 429 | 1 | 0 | 0 | 0 | 0 | 0 | 3 |
| 430 | 1 | 0 | 1 | 1 | 1 | 1 | 7 |
| 431 | 0 | 1 | 1 | 0 | 0 | 0 | 6 |
| 432 | 1 | 0 | 1 | 1 | 0 | 1 | 6 |
| 433 | 0 | 0 | 1 | 0 | 1 | 0 | 4 |

|     |   |   |   |   |   |   |   |
|-----|---|---|---|---|---|---|---|
| 434 | 0 | 0 | 1 | 1 | 0 | 1 | 6 |
| 435 | 0 | 0 | 0 | 0 | 1 | 0 | 2 |
| 436 | 0 | 0 | 0 | 0 | 1 | 0 | 2 |
| 437 | 0 | 0 | 0 | 0 | 0 | 0 | 3 |
| 438 | 0 | 0 | 0 | 1 | 1 | 0 | 5 |
| 439 | 0 | 0 | 0 | 0 | 0 | 0 | 1 |
| 440 | 0 | 0 | 0 | 1 | 1 | 0 | 4 |
| 441 | 0 | 0 | 1 | 0 | 1 | 0 | 4 |
| 442 | 0 | 0 | 1 | 1 | 1 | 1 | 9 |
| 443 | 0 | 0 | 0 | 0 | 0 | 1 | 6 |
| 444 | 0 | 0 | 1 | 0 | 0 | 1 | 4 |
| 445 | 0 | 0 | 0 | 0 | 0 | 0 | 1 |
| 446 | 0 | 0 | 0 | 0 | 0 | 0 | 1 |
| 447 | 0 | 0 | 0 | 0 | 0 | 0 | 1 |
| 448 | 0 | 0 | 1 | 1 | 0 | 1 | 5 |
| 449 | 0 | 0 | 1 | 1 | 0 | 1 | 5 |
| 450 | 0 | 0 | 0 | 0 | 1 | 0 | 3 |
| 451 | 1 | 0 | 0 | 0 | 0 | 0 | 2 |
| 452 | 1 | 0 | 0 | 0 | 0 | 0 | 4 |
| 453 | 0 | 0 | 1 | 1 | 0 | 0 | 7 |
| 454 | 0 | 0 | 1 | 1 | 1 | 0 | 5 |
| 455 | 0 | 0 | 0 | 0 | 0 | 0 | 1 |
| 456 | 1 | 0 | 0 | 0 | 1 | 0 | 4 |
| 457 | 0 | 0 | 0 | 0 | 0 | 0 | 1 |
| 458 | 0 | 0 | 1 | 1 | 0 | 1 | 5 |

|     |   |   |   |   |   |   |   |
|-----|---|---|---|---|---|---|---|
| 459 | 0 | 0 | 0 | 0 | 1 | 0 | 2 |
| 460 | 0 | 0 | 0 | 0 | 1 | 0 | 2 |
| 461 | 0 | 0 | 0 | 0 | 1 | 0 | 2 |
| 462 | 0 | 0 | 0 | 1 | 0 | 1 | 5 |
| 463 | 0 | 0 | 0 | 0 | 1 | 0 | 3 |
| 464 | 0 | 0 | 0 | 0 | 1 | 0 | 2 |
| 465 | 0 | 0 | 0 | 1 | 1 | 0 | 4 |
| 466 | 0 | 0 | 0 | 0 | 0 | 0 | 0 |
| 467 | 0 | 0 | 0 | 0 | 0 | 0 | 0 |
| 468 | 0 | 0 | 0 | 0 | 0 | 0 | 1 |
| 469 | 0 | 0 | 0 | 1 | 1 | 0 | 5 |
| 470 | 0 | 0 | 1 | 0 | 1 | 0 | 3 |
| 471 | 0 | 0 | 0 | 0 | 0 | 0 | 2 |
| 472 | 0 | 0 | 1 | 1 | 1 | 0 | 5 |
| 473 | 0 | 1 | 0 | 0 | 0 | 0 | 5 |
| 474 | 0 | 0 | 0 | 0 | 0 | 0 | 3 |
| 475 | 0 | 0 | 0 | 0 | 0 | 0 | 1 |
| 476 | 0 | 0 | 0 | 0 | 0 | 0 | 1 |
| 477 | 0 | 0 | 0 | 0 | 1 | 0 | 1 |
| 478 | 0 | 0 | 0 | 0 | 0 | 0 | 1 |
| 479 | 0 | 0 | 1 | 1 | 0 | 0 | 4 |
| 480 | 0 | 0 | 0 | 0 | 0 | 0 | 1 |
| 481 | 1 | 0 | 1 | 0 | 0 | 1 | 7 |
| 482 | 1 | 1 | 0 | 1 | 0 | 0 | 4 |
| 483 | 0 | 0 | 0 | 1 | 0 | 1 | 8 |

|     |   |   |   |   |   |   |   |
|-----|---|---|---|---|---|---|---|
| 484 | 0 | 0 | 0 | 0 | 0 | 0 | 2 |
| 485 | 0 | 0 | 0 | 0 | 0 | 0 | 1 |
| 486 | 0 | 1 | 0 | 0 | 0 | 0 | 3 |
| 487 | 0 | 0 | 1 | 0 | 0 | 0 | 2 |
| 488 | 0 | 0 | 0 | 0 | 0 | 0 | 1 |
| 489 | 0 | 0 | 0 | 0 | 0 | 0 | 4 |
| 490 | 0 | 0 | 0 | 0 | 0 | 0 | 0 |
| 491 | 0 | 0 | 0 | 0 | 0 | 1 | 5 |
| 492 | 0 | 0 | 0 | 0 | 1 | 0 | 4 |
| 493 | 0 | 0 | 1 | 0 | 1 | 0 | 3 |
| 494 | 0 | 1 | 0 | 0 | 0 | 0 | 4 |
| 495 | 0 | 0 | 0 | 0 | 0 | 0 | 2 |
| 496 | 0 | 0 | 0 | 0 | 1 | 0 | 2 |
| 497 | 0 | 0 | 0 | 0 | 0 | 0 | 1 |
| 498 | 0 | 0 | 0 | 0 | 0 | 0 | 1 |
| 499 | 0 | 0 | 0 | 0 | 0 | 0 | 1 |
| 500 | 0 | 0 | 0 | 0 | 1 | 0 | 2 |
| 501 | 0 | 1 | 0 | 0 | 0 | 0 | 3 |
| 502 | 0 | 0 | 0 | 0 | 0 | 0 | 1 |
| 503 | 0 | 0 | 0 | 1 | 0 | 0 | 4 |
| 504 | 0 | 0 | 0 | 0 | 1 | 0 | 2 |
| 505 | 0 | 0 | 1 | 1 | 0 | 0 | 4 |
| 506 | 0 | 0 | 0 | 0 | 0 | 1 | 4 |
| 507 | 0 | 0 | 0 | 0 | 0 | 0 | 2 |
| 508 | 0 | 0 | 0 | 0 | 0 | 0 | 2 |

|     |   |   |   |   |   |   |   |
|-----|---|---|---|---|---|---|---|
| 509 | 0 | 0 | 0 | 0 | 0 | 1 | 2 |
| 510 | 0 | 0 | 0 | 0 | 0 | 0 | 1 |
| 511 | 0 | 0 | 0 | 0 | 0 | 0 | 0 |
| 512 | 0 | 0 | 0 | 0 | 0 | 0 | 0 |
| 513 | 0 | 0 | 0 | 0 | 1 | 0 | 3 |
| 514 | 0 | 0 | 1 | 0 | 0 | 0 | 4 |
| 515 | 0 | 0 | 1 | 0 | 1 | 0 | 3 |
| 516 | 0 | 0 | 0 | 0 | 0 | 0 | 1 |
| 517 | 0 | 0 | 1 | 1 | 0 | 0 | 2 |
| 518 | 0 | 0 | 0 | 0 | 0 | 1 | 4 |
| 519 | 0 | 0 | 1 | 0 | 0 | 1 | 4 |
| 520 | 0 | 0 | 0 | 0 | 0 | 0 | 2 |
| 521 | 0 | 0 | 1 | 1 | 1 | 1 | 7 |
| 522 | 0 | 0 | 1 | 1 | 1 | 1 | 8 |
| 523 | 1 | 1 | 1 | 1 | 1 | 1 | 9 |
| 524 | 0 | 0 | 0 | 0 | 0 | 0 | 4 |
| 525 | 0 | 0 | 0 | 0 | 0 | 0 | 1 |
| 526 | 0 | 0 | 1 | 1 | 1 | 1 | 6 |
| 527 | 0 | 0 | 1 | 1 | 1 | 0 | 8 |
| 528 | 0 | 0 | 1 | 0 | 0 | 0 | 2 |
| 529 | 0 | 0 | 0 | 0 | 0 | 0 | 1 |
| 530 | 0 | 0 | 0 | 0 | 0 | 0 | 1 |
| 531 | 0 | 0 | 0 | 0 | 0 | 0 | 3 |
| 532 | 0 | 0 | 0 | 1 | 1 | 0 | 5 |
| 533 | 0 | 0 | 0 | 0 | 0 | 0 | 0 |

|     |   |   |   |   |   |   |   |
|-----|---|---|---|---|---|---|---|
| 534 | 0 | 0 | 0 | 0 | 1 | 0 | 3 |
| 535 | 0 | 0 | 0 | 0 | 0 | 0 | 4 |
| 536 | 0 | 0 | 1 | 1 | 0 | 0 | 4 |
| 537 | 0 | 0 | 1 | 1 | 0 | 0 | 3 |
| 538 | 0 | 0 | 0 | 0 | 0 | 0 | 1 |
| 539 | 0 | 0 | 0 | 0 | 1 | 0 | 3 |
| 540 | 0 | 1 | 0 | 0 | 0 | 0 | 3 |
| 541 | 0 | 0 | 0 | 0 | 0 | 0 | 3 |
| 542 | 0 | 0 | 0 | 0 | 0 | 0 | 1 |
| 543 | 0 | 0 | 1 | 0 | 0 | 0 | 3 |
| 544 | 0 | 0 | 0 | 0 | 1 | 0 | 6 |
| 545 | 0 | 0 | 1 | 0 | 1 | 0 | 5 |
| 546 | 0 | 0 | 0 | 0 | 0 | 0 | 4 |
| 547 | 0 | 0 | 1 | 1 | 1 | 0 | 5 |
| 548 | 0 | 0 | 1 | 0 | 0 | 1 | 3 |
| 549 | 0 | 0 | 1 | 1 | 0 | 0 | 4 |
| 550 | 0 | 0 | 0 | 0 | 0 | 1 | 2 |
| 551 | 0 | 0 | 0 | 0 | 0 | 0 | 1 |
| 552 | 1 | 0 | 1 | 0 | 1 | 1 | 7 |
| 553 | 0 | 0 | 0 | 0 | 0 | 0 | 1 |
| 554 | 0 | 0 | 0 | 0 | 0 | 0 | 2 |
| 555 | 0 | 0 | 0 | 0 | 1 | 0 | 3 |
| 556 | 0 | 0 | 1 | 0 | 0 | 0 | 3 |
| 557 | 0 | 1 | 1 | 0 | 0 | 1 | 7 |
| 558 | 0 | 0 | 1 | 1 | 0 | 0 | 3 |

|     |   |   |   |   |   |   |   |
|-----|---|---|---|---|---|---|---|
| 559 | 0 | 0 | 1 | 1 | 0 | 1 | 8 |
| 560 | 0 | 0 | 0 | 1 | 0 | 0 | 4 |
| 561 | 0 | 0 | 0 | 0 | 0 | 0 | 1 |
| 562 | 0 | 1 | 0 | 0 | 0 | 0 | 4 |
| 563 | 1 | 1 | 0 | 0 | 0 | 1 | 9 |
| 564 | 0 | 0 | 0 | 0 | 0 | 0 | 3 |
| 565 | 0 | 0 | 0 | 0 | 1 | 0 | 4 |
| 566 | 1 | 0 | 0 | 0 | 0 | 0 | 2 |
| 567 | 0 | 0 | 0 | 0 | 0 | 0 | 1 |
| 568 | 0 | 1 | 0 | 0 | 1 | 0 | 4 |
| 569 | 0 | 0 | 0 | 0 | 0 | 1 | 8 |
| 570 | 0 | 0 | 1 | 1 | 0 | 1 | 5 |
| 571 | 0 | 0 | 1 | 1 | 1 | 1 | 9 |
| 572 | 0 | 0 | 0 | 0 | 0 | 0 | 1 |
| 573 | 0 | 0 | 0 | 0 | 0 | 0 | 5 |
| 574 | 0 | 0 | 0 | 0 | 0 | 0 | 2 |
| 575 | 0 | 0 | 0 | 0 | 0 | 0 | 0 |
| 576 | 0 | 0 | 0 | 0 | 0 | 0 | 1 |
| 577 | 0 | 0 | 0 | 0 | 0 | 0 | 1 |
| 578 | 1 | 0 | 0 | 0 | 0 | 0 | 2 |
| 579 | 0 | 0 | 0 | 0 | 1 | 0 | 7 |
| 580 | 0 | 0 | 0 | 0 | 0 | 1 | 5 |
| 581 | 0 | 0 | 0 | 0 | 0 | 0 | 1 |
| 582 | 0 | 0 | 0 | 0 | 0 | 0 | 1 |
| 583 | 0 | 0 | 0 | 0 | 0 | 0 | 0 |



|     |   |   |   |   |   |   |   |
|-----|---|---|---|---|---|---|---|
| 584 | 0 | 0 | 0 | 0 | 0 | 1 | 2 |
| 585 | 0 | 0 | 0 | 0 | 1 | 0 | 3 |
| 586 | 0 | 0 | 0 | 0 | 0 | 0 | 2 |
| 587 | 0 | 0 | 0 | 0 | 1 | 0 | 3 |
| 588 | 0 | 0 | 0 | 0 | 0 | 0 | 1 |
| 589 | 0 | 0 | 1 | 0 | 0 | 1 | 6 |
| 590 | 0 | 0 | 1 | 1 | 0 | 0 | 2 |
| 591 | 0 | 1 | 0 | 0 | 0 | 0 | 4 |
| 592 | 0 | 0 | 0 | 0 | 0 | 0 | 0 |
| 593 | 0 | 0 | 1 | 1 | 0 | 0 | 4 |
| 594 | 0 | 0 | 1 | 1 | 0 | 0 | 5 |
| 595 | 1 | 1 | 0 | 0 | 0 | 0 | 5 |
| 596 | 0 | 0 | 0 | 0 | 0 | 0 | 3 |
| 597 | 0 | 0 | 0 | 0 | 0 | 0 | 4 |
| 598 | 0 | 0 | 1 | 1 | 0 | 0 | 4 |
| 599 | 1 | 0 | 1 | 1 | 0 | 0 | 4 |
| 600 | 0 | 1 | 0 | 0 | 0 | 1 | 5 |
| 601 | 0 | 0 | 0 | 0 | 0 | 1 | 3 |
| 602 | 0 | 0 | 1 | 0 | 0 | 1 | 6 |
| 603 | 0 | 0 | 1 | 1 | 1 | 0 | 6 |
| 604 | 0 | 0 | 0 | 0 | 0 | 0 | 1 |
| 605 | 1 | 0 | 0 | 0 | 0 | 0 | 2 |
| 606 | 0 | 0 | 1 | 1 | 0 | 0 | 3 |
| 607 | 0 | 0 | 1 | 1 | 0 | 0 | 3 |
| 608 | 0 | 0 | 0 | 0 | 0 | 0 | 1 |

|     |   |   |   |   |   |   |   |
|-----|---|---|---|---|---|---|---|
| 609 | 1 | 0 | 0 | 0 | 1 | 1 | 9 |
| 610 | 0 | 1 | 0 | 0 | 0 | 0 | 2 |
| 611 | 0 | 0 | 0 | 0 | 0 | 1 | 5 |
| 612 | 0 | 0 | 1 | 1 | 1 | 0 | 4 |
| 613 | 1 | 0 | 1 | 0 | 1 | 0 | 6 |
| 614 | 0 | 0 | 0 | 0 | 0 | 0 | 1 |
| 615 | 1 | 0 | 1 | 0 | 0 | 1 | 4 |
| 616 | 0 | 0 | 1 | 1 | 1 | 1 | 9 |
| 617 | 1 | 0 | 0 | 0 | 0 | 0 | 4 |
| 618 | 0 | 0 | 0 | 0 | 1 | 1 | 3 |
| 619 | 0 | 0 | 0 | 0 | 1 | 0 | 3 |
| 620 | 1 | 0 | 1 | 0 | 0 | 0 | 9 |
| 621 | 0 | 0 | 0 | 0 | 0 | 0 | 2 |
| 622 | 0 | 0 | 0 | 0 | 1 | 0 | 2 |
| 623 | 1 | 0 | 0 | 1 | 0 | 1 | 6 |
| 624 | 0 | 0 | 0 | 0 | 0 | 1 | 3 |
| 625 | 1 | 0 | 1 | 0 | 0 | 1 | 9 |
| 626 | 0 | 0 | 1 | 0 | 0 | 0 | 4 |
| 627 | 0 | 0 | 0 | 0 | 1 | 0 | 4 |
| 628 | 0 | 1 | 1 | 0 | 1 | 0 | 5 |
| 629 | 0 | 1 | 0 | 1 | 0 | 0 | 6 |
| 630 | 0 | 0 | 0 | 0 | 0 | 0 | 1 |
| 631 | 0 | 1 | 1 | 0 | 0 | 1 | 6 |
| 632 | 0 | 0 | 1 | 0 | 0 | 1 | 3 |
| 633 | 1 | 0 | 1 | 0 | 1 | 0 | 8 |

|     |   |   |   |   |   |   |    |
|-----|---|---|---|---|---|---|----|
| 634 | 0 | 0 | 0 | 0 | 0 | 0 | 1  |
| 635 | 0 | 0 | 0 | 0 | 0 | 0 | 3  |
| 636 | 1 | 0 | 0 | 1 | 1 | 0 | 6  |
| 637 | 0 | 0 | 0 | 0 | 0 | 0 | 5  |
| 638 | 0 | 1 | 0 | 1 | 0 | 0 | 4  |
| 639 | 0 | 0 | 0 | 0 | 0 | 0 | 1  |
| 640 | 0 | 0 | 0 | 0 | 0 | 0 | 0  |
| 641 | 0 | 0 | 0 | 0 | 1 | 0 | 2  |
| 642 | 0 | 0 | 0 | 0 | 0 | 0 | 1  |
| 643 | 1 | 0 | 0 | 0 | 0 | 0 | 4  |
| 644 | 0 | 1 | 0 | 1 | 1 | 0 | 11 |
| 645 | 0 | 0 | 1 | 1 | 0 | 0 | 4  |
| 646 | 0 | 0 | 1 | 0 | 0 | 1 | 8  |
| 647 | 0 | 0 | 1 | 1 | 1 | 1 | 6  |
| 648 | 0 | 0 | 0 | 0 | 0 | 0 | 5  |
| 649 | 0 | 0 | 1 | 1 | 0 | 0 | 4  |
| 650 | 0 | 0 | 0 | 0 | 0 | 0 | 1  |
| 651 | 0 | 0 | 0 | 0 | 0 | 0 | 2  |
| 652 | 0 | 0 | 0 | 0 | 0 | 0 | 1  |
| 653 | 0 | 1 | 0 | 0 | 0 | 0 | 3  |
| 654 | 0 | 0 | 0 | 0 | 0 | 0 | 1  |
| 655 | 0 | 1 | 1 | 0 | 0 | 0 | 4  |
| 656 | 0 | 0 | 0 | 0 | 0 | 0 | 2  |
| 657 | 0 | 0 | 0 | 0 | 0 | 0 | 1  |
| 658 | 1 | 0 | 0 | 0 | 0 | 0 | 2  |

|     |   |   |   |   |   |   |   |
|-----|---|---|---|---|---|---|---|
| 659 | 0 | 0 | 0 | 0 | 0 | 0 | 2 |
| 660 | 0 | 0 | 0 | 0 | 0 | 0 | 3 |
| 661 | 0 | 0 | 1 | 1 | 0 | 0 | 4 |
| 662 | 0 | 0 | 0 | 0 | 0 | 0 | 1 |
| 663 | 0 | 0 | 0 | 0 | 0 | 0 | 1 |
| 664 | 0 | 0 | 0 | 0 | 0 | 0 | 1 |
| 665 | 0 | 0 | 0 | 0 | 0 | 0 | 1 |
| 666 | 0 | 0 | 0 | 0 | 0 | 0 | 3 |
| 667 | 0 | 0 | 0 | 0 | 0 | 0 | 1 |
| 668 | 0 | 0 | 0 | 0 | 0 | 0 | 1 |
| 669 | 0 | 0 | 1 | 0 | 0 | 1 | 6 |
| 670 | 0 | 0 | 0 | 0 | 0 | 0 | 3 |
| 671 | 0 | 0 | 0 | 1 | 0 | 0 | 4 |
| 672 | 0 | 0 | 0 | 0 | 0 | 0 | 2 |
| 673 | 0 | 0 | 0 | 0 | 0 | 0 | 2 |
| 674 | 0 | 0 | 0 | 0 | 1 | 0 | 2 |
| 675 | 1 | 0 | 0 | 0 | 0 | 0 | 3 |
| 676 | 0 | 0 | 0 | 0 | 0 | 0 | 1 |
| 677 | 0 | 0 | 0 | 0 | 0 | 0 | 1 |
| 678 | 0 | 0 | 0 | 0 | 0 | 0 | 1 |
| 679 | 0 | 0 | 0 | 0 | 0 | 0 | 2 |
| 680 | 0 | 0 | 0 | 0 | 0 | 0 | 2 |
| 681 | 0 | 0 | 0 | 0 | 0 | 0 | 1 |
| 682 | 0 | 0 | 0 | 1 | 0 | 0 | 3 |
| 683 | 0 | 0 | 0 | 0 | 0 | 0 | 4 |

|     |   |   |   |   |   |   |   |
|-----|---|---|---|---|---|---|---|
| 684 | 0 | 0 | 0 | 0 | 0 | 0 | 1 |
| 685 | 0 | 0 | 0 | 0 | 0 | 0 | 1 |
| 686 | 0 | 0 | 0 | 0 | 0 | 0 | 2 |
| 687 | 0 | 0 | 0 | 0 | 0 | 0 | 1 |
| 688 | 0 | 0 | 0 | 0 | 0 | 0 | 1 |
| 689 | 1 | 0 | 0 | 0 | 0 | 0 | 4 |
| 690 | 1 | 0 | 0 | 0 | 0 | 0 | 2 |
| 691 | 0 | 0 | 0 | 0 | 0 | 0 | 1 |
| 692 | 0 | 0 | 0 | 0 | 0 | 0 | 3 |
| 693 | 0 | 0 | 0 | 0 | 0 | 0 | 3 |
| 694 | 1 | 0 | 0 | 0 | 0 | 0 | 3 |
| 695 | 0 | 0 | 0 | 1 | 0 | 1 | 6 |
| 696 | 0 | 0 | 0 | 0 | 0 | 0 | 2 |
| 697 | 0 | 0 | 0 | 0 | 0 | 0 | 0 |
| 698 | 0 | 0 | 1 | 0 | 0 | 0 | 6 |
| 699 | 0 | 0 | 0 | 0 | 0 | 1 | 2 |
| 700 | 0 | 0 | 0 | 0 | 0 | 0 | 4 |
| 701 | 0 | 0 | 0 | 0 | 0 | 0 | 2 |
| 702 | 1 | 0 | 0 | 0 | 0 | 0 | 3 |
| 703 | 0 | 0 | 0 | 0 | 0 | 0 | 1 |
| 704 | 0 | 0 | 1 | 0 | 0 | 1 | 4 |
| 705 | 0 | 0 | 0 | 0 | 0 | 0 | 1 |
| 706 | 0 | 0 | 0 | 0 | 0 | 0 | 5 |
| 707 | 0 | 0 | 0 | 0 | 0 | 0 | 1 |
| 708 | 0 | 0 | 0 | 0 | 0 | 0 | 2 |

|     |   |   |   |   |   |   |   |
|-----|---|---|---|---|---|---|---|
| 709 | 1 | 0 | 0 | 0 | 1 | 0 | 5 |
| 710 | 0 | 0 | 0 | 1 | 1 | 0 | 5 |
| 711 | 0 | 0 | 0 | 0 | 0 | 0 | 2 |
| 712 | 0 | 0 | 0 | 0 | 1 | 1 | 7 |
| 713 | 0 | 0 | 0 | 0 | 0 | 0 | 3 |
| 714 | 0 | 0 | 0 | 0 | 0 | 1 | 3 |
| 715 | 0 | 0 | 0 | 0 | 0 | 0 | 1 |
| 716 | 0 | 0 | 1 | 1 | 0 | 0 | 3 |
| 717 | 0 | 0 | 1 | 1 | 0 | 0 | 4 |
| 718 | 0 | 0 | 0 | 1 | 0 | 0 | 4 |
| 719 | 0 | 0 | 0 | 0 | 0 | 0 | 1 |
| 720 | 0 | 0 | 1 | 1 | 0 | 0 | 4 |
| 721 | 0 | 0 | 0 | 1 | 0 | 1 | 4 |
| 722 | 1 | 0 | 0 | 1 | 0 | 0 | 5 |
| 723 | 0 | 0 | 0 | 0 | 0 | 0 | 2 |
| 724 | 0 | 0 | 0 | 0 | 0 | 0 | 2 |
| 725 | 0 | 0 | 0 | 0 | 0 | 0 | 1 |
| 726 | 1 | 0 | 1 | 1 | 0 | 1 | 7 |
| 727 | 1 | 0 | 1 | 1 | 0 | 1 | 6 |
| 728 | 0 | 0 | 0 | 0 | 0 | 0 | 1 |
| 729 | 0 | 0 | 1 | 1 | 0 | 0 | 4 |
| 730 | 0 | 0 | 0 | 0 | 0 | 0 | 1 |
| 731 | 1 | 0 | 0 | 0 | 0 | 1 | 3 |
| 732 | 1 | 0 | 1 | 1 | 0 | 0 | 6 |
| 733 | 1 | 0 | 1 | 0 | 0 | 0 | 5 |

|     |   |   |   |   |   |   |   |
|-----|---|---|---|---|---|---|---|
| 734 | 0 | 0 | 1 | 0 | 0 | 1 | 7 |
| 735 | 1 | 0 | 0 | 0 | 0 | 0 | 3 |
| 736 | 0 | 0 | 0 | 1 | 0 | 0 | 2 |
| 737 | 0 | 0 | 0 | 0 | 0 | 0 | 2 |
| 738 | 0 | 0 | 0 | 0 | 0 | 0 | 3 |
| 739 | 0 | 0 | 0 | 0 | 0 | 0 | 2 |
| 740 | 0 | 0 | 0 | 0 | 0 | 0 | 3 |
| 741 | 0 | 0 | 0 | 1 | 0 | 0 | 2 |
| 742 | 0 | 0 | 0 | 0 | 0 | 0 | 4 |
| 743 | 0 | 0 | 0 | 0 | 0 | 0 | 4 |
| 744 | 0 | 0 | 0 | 0 | 0 | 1 | 4 |
| 745 | 0 | 0 | 0 | 0 | 0 | 0 | 0 |
| 746 | 1 | 1 | 0 | 1 | 1 | 0 | 6 |
| 747 | 0 | 0 | 0 | 0 | 1 | 1 | 4 |
| 748 | 0 | 0 | 0 | 1 | 1 | 0 | 5 |
| 749 | 0 | 0 | 0 | 1 | 0 | 0 | 5 |
| 750 | 0 | 0 | 0 | 0 | 1 | 0 | 2 |
| 751 | 1 | 0 | 0 | 0 | 0 | 1 | 3 |
| 752 | 0 | 0 | 0 | 0 | 0 | 1 | 3 |
| 753 | 0 | 0 | 1 | 0 | 0 | 1 | 6 |
| 754 | 0 | 0 | 0 | 0 | 0 | 0 | 4 |
| 755 | 0 | 0 | 0 | 0 | 1 | 0 | 3 |
| 756 | 0 | 0 | 0 | 0 | 0 | 0 | 2 |
| 757 | 0 | 0 | 0 | 0 | 0 | 0 | 1 |
| 758 | 0 | 0 | 0 | 0 | 0 | 0 | 0 |

|     |   |   |   |   |   |   |    |
|-----|---|---|---|---|---|---|----|
| 759 | 0 | 0 | 0 | 0 | 0 | 0 | 4  |
| 760 | 0 | 0 | 0 | 0 | 0 | 1 | 4  |
| 761 | 1 | 0 | 0 | 0 | 0 | 1 | 3  |
| 762 | 0 | 0 | 0 | 0 | 0 | 0 | 2  |
| 763 | 0 | 0 | 0 | 0 | 0 | 0 | 3  |
| 764 | 0 | 0 | 0 | 0 | 0 | 0 | 3  |
| 765 | 0 | 0 | 0 | 0 | 0 | 0 | 3  |
| 766 | 0 | 0 | 0 | 0 | 0 | 0 | 1  |
| 767 | 0 | 0 | 0 | 0 | 0 | 0 | 1  |
| 768 | 1 | 0 | 0 | 0 | 0 | 1 | 4  |
| 769 | 0 | 0 | 0 | 1 | 0 | 0 | 2  |
| 770 | 0 | 0 | 0 | 0 | 1 | 0 | 3  |
| 771 | 0 | 0 | 1 | 0 | 0 | 1 | 8  |
| 772 | 0 | 0 | 0 | 0 | 0 | 1 | 3  |
| 773 | 0 | 0 | 0 | 0 | 0 | 0 | 0  |
| 774 | 0 | 1 | 0 | 0 | 1 | 1 | 4  |
| 775 | 1 | 0 | 0 | 0 | 1 | 0 | 4  |
| 776 | 0 | 0 | 0 | 0 | 0 | 0 | 1  |
| 777 | 1 | 1 | 0 | 0 | 1 | 1 | 11 |
| 778 | 0 | 0 | 0 | 0 | 0 | 0 | 2  |
| 779 | 0 | 0 | 0 | 1 | 0 | 0 | 5  |
| 780 | 0 | 0 | 0 | 0 | 0 | 0 | 1  |
| 781 | 1 | 0 | 0 | 0 | 0 | 0 | 6  |
| 782 | 0 | 0 | 0 | 0 | 1 | 0 | 3  |
| 783 | 0 | 0 | 0 | 0 | 0 | 0 | 3  |



|     |   |   |   |   |   |   |   |
|-----|---|---|---|---|---|---|---|
| 784 | 0 | 0 | 0 | 0 | 1 | 0 | 2 |
| 785 | 0 | 0 | 0 | 0 | 0 | 0 | 4 |
| 786 | 0 | 0 | 0 | 0 | 1 | 1 | 5 |
| 787 | 0 | 0 | 0 | 0 | 0 | 1 | 6 |
| 788 | 0 | 0 | 0 | 0 | 0 | 0 | 4 |
| 789 | 0 | 0 | 0 | 0 | 0 | 1 | 3 |
| 790 | 1 | 0 | 0 | 0 | 1 | 0 | 5 |
| 791 | 0 | 0 | 0 | 1 | 0 | 1 | 3 |
| 792 | 1 | 0 | 0 | 0 | 0 | 1 | 9 |
| 793 | 0 | 0 | 0 | 1 | 0 | 1 | 5 |
| 794 | 0 | 0 | 0 | 1 | 0 | 0 | 5 |
| 795 | 0 | 0 | 0 | 0 | 1 | 1 | 5 |
| 796 | 0 | 0 | 0 | 1 | 0 | 1 | 8 |
| 797 | 0 | 0 | 0 | 0 | 0 | 1 | 8 |
| 798 | 0 | 0 | 0 | 1 | 1 | 1 | 5 |

| number | Medications for BTP onset (1intramuscular injection of hydromorphone hydrochloride;<br>2subcutaneous morphine; 3intramuscular injection of ketorolac tromethamine;4oral<br>morphine ;5intravenous analgesia;6PCIA;7other) | intensity | breakthrough pain (0<br>none; 1 BTP occure) | episodes | pain at discharge | average stay |    |
|--------|---------------------------------------------------------------------------------------------------------------------------------------------------------------------------------------------------------------------------|-----------|---------------------------------------------|----------|-------------------|--------------|----|
| 1      |                                                                                                                                                                                                                           | 3         | 6                                           | 1        | 4                 | 2            | 8  |
| 2      |                                                                                                                                                                                                                           | 0         | 0                                           | 0        | 0                 | 0            | 16 |
| 3      |                                                                                                                                                                                                                           | 0         | 0                                           | 0        | 0                 | 0            | 4  |
| 4      |                                                                                                                                                                                                                           | 2         | 7                                           | 1        | 2                 | 2            | 7  |
| 5      |                                                                                                                                                                                                                           | 2         | 8                                           | 1        | 3                 | 2            | 12 |
| 6      |                                                                                                                                                                                                                           | 3         | 6                                           | 1        | 10                | 2            | 15 |
| 7      |                                                                                                                                                                                                                           | 3         | 6                                           | 1        | 6                 | 2            | 33 |
| 8      |                                                                                                                                                                                                                           | 2         | 7                                           | 1        | 1                 | 1            | 21 |
| 9      |                                                                                                                                                                                                                           | 0         | 0                                           | 0        | 0                 | 0            | 4  |
| 10     |                                                                                                                                                                                                                           | 0         | 0                                           | 0        | 0                 | 0            | 7  |
| 11     |                                                                                                                                                                                                                           | 3         | 6                                           | 1        | 2                 | 1            | 7  |
| 12     |                                                                                                                                                                                                                           | 0         | 0                                           | 0        | 0                 | 0            | 9  |
| 13     |                                                                                                                                                                                                                           | 0         | 0                                           | 0        | 0                 | 0            | 8  |
| 14     |                                                                                                                                                                                                                           | 3         | 6                                           | 1        | 10                | 2            | 13 |
| 15     |                                                                                                                                                                                                                           | 3         | 6                                           | 1        | 2                 | 2            | 6  |
| 16     |                                                                                                                                                                                                                           | 2         | 7                                           | 1        | 2                 | 2            | 31 |

|    |   |   |   |    |   |      |
|----|---|---|---|----|---|------|
| 17 | 7 | 6 | 1 | 4  | 2 | 12   |
| 18 | 0 | 0 | 0 | 0  | 0 | 7    |
| 19 | 7 | 6 | 1 | 2  | 2 | 2    |
| 20 | 0 | 0 | 0 | 0  | 0 | 6    |
| 21 | 5 | 6 | 1 | 1  | 2 | 6    |
| 22 | 2 | 8 | 1 | 2  | 2 | 24   |
| 23 | 2 | 5 | 1 | 3  | 2 | 8    |
| 24 | 6 | 6 | 1 | 4  | 3 | 7    |
| 25 | 2 | 5 | 1 | 5  | 2 | 14   |
| 26 | 0 | 0 | 0 | 0  | 0 | 19   |
| 27 | 2 | 7 | 1 | 6  | 3 | 18   |
| 28 | 2 | 7 | 1 | 7  | 2 | 45   |
| 29 | 2 | 7 | 1 | 8  | 2 | 12   |
| 30 | 2 | 7 | 1 | 9  | 3 | 14   |
| 31 | 0 | 0 | 0 | 0  | 0 | 14   |
| 32 | 0 | 0 | 0 | 0  | 0 | 33   |
| 33 | 3 | 6 | 1 | 10 | 2 | 4    |
| 34 | 3 | 6 | 1 | 1  | 1 | 26   |
| 35 | 2 | 5 | 1 | 2  | 2 | 7    |
| 36 | 2 | 5 | 1 | 14 | 2 | 16.5 |
| 37 | 0 | 0 | 0 | 0  | 0 | 47   |
| 38 | 2 | 7 | 1 | 15 | 2 | 11   |
| 39 | 0 | 0 | 0 | 0  | 0 | 5    |
| 40 | 0 | 0 | 0 | 0  | 0 | 26   |
| 41 | 0 | 0 | 0 | 0  | 0 | 1    |

|    |   |    |   |    |   |    |
|----|---|----|---|----|---|----|
| 42 | 3 | 6  | 1 | 3  | 2 | 14 |
| 43 | 3 | 6  | 1 | 5  | 2 | 4  |
| 44 | 1 | 7  | 1 | 6  | 2 | 9  |
| 45 | 0 | 0  | 0 | 0  | 0 | 2  |
| 46 | 0 | 0  | 0 | 0  | 0 | 4  |
| 47 | 4 | 6  | 1 | 7  | 2 | 9  |
| 48 | 0 | 0  | 0 | 0  | 0 | 10 |
| 49 | 3 | 6  | 1 | 8  | 2 | 5  |
| 50 | 1 | 7  | 1 | 8  | 2 | 18 |
| 51 | 0 | 0  | 0 | 0  | 0 | 9  |
| 52 | 3 | 6  | 1 | 9  | 2 | 8  |
| 53 | 0 | 0  | 0 | 0  | 0 | 3  |
| 54 | 0 | 0  | 0 | 0  | 0 | 6  |
| 55 | 2 | 6  | 1 | 10 | 2 | 7  |
| 56 | 2 | 5  | 1 | 2  | 2 | 11 |
| 57 | 5 | 5  | 1 | 3  | 2 | 16 |
| 58 | 1 | 7  | 1 | 4  | 3 | 8  |
| 59 | 1 | 7  | 1 | 5  | 3 | 28 |
| 60 | 1 | 7  | 1 | 5  | 3 | 12 |
| 61 | 2 | 8  | 1 | 10 | 3 | 39 |
| 62 | 4 | 6  | 1 | 6  | 2 | 6  |
| 63 | 2 | 10 | 1 | 7  | 3 | 50 |
| 64 | 0 | 0  | 0 | 0  | 0 | 8  |
| 65 | 1 | 7  | 1 | 8  | 2 | 18 |
| 66 | 0 | 0  | 0 | 0  | 0 | 20 |

|    |   |   |   |    |   |    |
|----|---|---|---|----|---|----|
| 67 | 3 | 6 | 1 | 12 | 3 | 3  |
| 68 | 2 | 5 | 1 | 11 | 3 | 7  |
| 69 | 2 | 5 | 1 | 10 | 2 | 22 |
| 70 | 3 | 6 | 1 | 2  | 2 | 16 |
| 71 | 7 | 6 | 1 | 3  | 2 | 7  |
| 72 | 0 | 0 | 0 | 0  | 0 | 7  |
| 73 | 2 | 5 | 1 | 4  | 3 | 8  |
| 74 | 2 | 5 | 1 | 6  | 3 | 8  |
| 75 | 0 | 0 | 0 | 0  | 0 | 8  |
| 76 | 0 | 0 | 0 | 0  | 0 | 1  |
| 77 | 2 | 5 | 1 | 7  | 3 | 4  |
| 78 | 1 | 7 | 1 | 8  | 3 | 9  |
| 79 | 0 | 0 | 0 | 0  | 0 | 14 |
| 80 | 0 | 0 | 0 | 0  | 0 | 12 |
| 81 | 2 | 6 | 1 | 8  | 3 | 7  |
| 82 | 2 | 6 | 1 | 5  | 3 | 7  |
| 83 | 0 | 0 | 0 | 0  | 0 | 12 |
| 84 | 2 | 6 | 1 | 4  | 2 | 8  |
| 85 | 1 | 7 | 1 | 3  | 2 | 12 |
| 86 | 3 | 6 | 1 | 6  | 2 | 15 |
| 87 | 1 | 7 | 1 | 7  | 3 | 15 |
| 88 | 2 | 5 | 1 | 1  | 2 | 8  |
| 89 | 7 | 6 | 1 | 2  | 2 | 12 |
| 90 | 2 | 6 | 1 | 3  | 2 | 26 |
| 91 | 0 | 0 | 0 | 0  | 0 | 11 |

|     |   |   |   |    |   |    |
|-----|---|---|---|----|---|----|
| 92  | 2 | 6 | 1 | 4  | 3 | 12 |
| 93  | 3 | 6 | 1 | 5  | 2 | 16 |
| 94  | 0 | 0 | 0 | 0  | 0 | 4  |
| 95  | 3 | 6 | 1 | 6  | 2 | 12 |
| 96  | 0 | 0 | 0 | 0  | 0 | 11 |
| 97  | 2 | 6 | 1 | 7  | 3 | 14 |
| 98  | 0 | 0 | 0 | 0  | 0 | 30 |
| 99  | 3 | 6 | 1 | 8  | 2 | 14 |
| 100 | 2 | 6 | 1 | 9  | 1 | 15 |
| 101 | 2 | 6 | 1 | 10 | 2 | 11 |
| 102 | 0 | 0 | 0 | 0  | 0 | 15 |
| 103 | 2 | 8 | 1 | 1  | 4 | 24 |
| 104 | 2 | 6 | 1 | 2  | 2 | 14 |
| 105 | 2 | 6 | 1 | 3  | 3 | 13 |
| 106 | 3 | 6 | 1 | 4  | 3 | 18 |
| 107 | 3 | 6 | 1 | 5  | 2 | 17 |
| 108 | 0 | 0 | 0 | 0  | 0 | 21 |
| 109 | 0 | 0 | 0 | 0  | 0 | 15 |
| 110 | 0 | 0 | 0 | 0  | 0 | 12 |
| 111 | 2 | 6 | 1 | 6  | 3 | 7  |
| 112 | 0 | 0 | 0 | 0  | 0 | 11 |
| 113 | 2 | 5 | 1 | 7  | 2 | 13 |
| 114 | 2 | 6 | 1 | 7  | 2 | 22 |
| 115 | 2 | 6 | 1 | 8  | 3 | 10 |
| 116 | 0 | 0 | 0 | 0  | 0 | 12 |

|     |   |   |   |    |   |    |
|-----|---|---|---|----|---|----|
| 117 | 2 | 5 | 1 | 9  | 2 | 31 |
| 118 | 2 | 6 | 1 | 10 | 2 | 10 |
| 119 | 0 | 0 | 0 | 0  | 0 | 8  |
| 120 | 0 | 0 | 0 | 0  | 0 | 19 |
| 121 | 0 | 0 | 0 | 0  | 0 | 5  |
| 122 | 2 | 6 | 1 | 10 | 2 | 30 |
| 123 | 2 | 6 | 1 | 11 | 2 | 12 |
| 124 | 3 | 6 | 1 | 2  | 3 | 10 |
| 125 | 0 | 0 | 0 | 0  | 0 | 7  |
| 126 | 0 | 0 | 0 | 0  | 0 | 14 |
| 127 | 0 | 0 | 0 | 0  | 0 | 6  |
| 128 | 2 | 5 | 1 | 5  | 3 | 39 |
| 129 | 0 | 0 | 0 | 0  | 0 | 4  |
| 130 | 3 | 6 | 1 | 6  | 2 | 18 |
| 131 | 0 | 0 | 0 | 0  | 0 | 6  |
| 132 | 0 | 0 | 0 | 0  | 0 | 9  |
| 133 | 0 | 0 | 0 | 0  | 0 | 5  |
| 134 | 0 | 0 | 0 | 0  | 0 | 12 |
| 135 | 4 | 6 | 1 | 7  | 2 | 8  |
| 136 | 0 | 0 | 0 | 0  | 0 | 9  |
| 137 | 2 | 8 | 1 | 8  | 2 | 13 |
| 138 | 2 | 5 | 1 | 9  | 3 | 32 |
| 139 | 1 | 7 | 1 | 10 | 2 | 33 |
| 140 | 5 | 5 | 1 | 1  | 2 | 6  |
| 141 | 0 | 0 | 0 | 0  | 0 | 8  |

|     |   |   |   |   |   |    |
|-----|---|---|---|---|---|----|
| 142 | 0 | 0 | 0 | 0 | 0 | 9  |
| 143 | 1 | 7 | 1 | 2 | 2 | 26 |
| 144 | 1 | 7 | 1 | 1 | 2 | 4  |
| 145 | 2 | 5 | 1 | 2 | 2 | 18 |
| 146 | 0 | 0 | 0 | 0 | 0 | 7  |
| 147 | 0 | 0 | 0 | 0 | 0 | 8  |
| 148 | 0 | 0 | 0 | 0 | 0 | 6  |
| 149 | 3 | 6 | 1 | 3 | 2 | 20 |
| 150 | 0 | 0 | 0 | 0 | 0 | 18 |
| 151 | 0 | 0 | 0 | 0 | 0 | 14 |
| 152 | 5 | 5 | 1 | 2 | 2 | 11 |
| 153 | 0 | 0 | 0 | 0 | 0 | 7  |
| 154 | 1 | 7 | 1 | 3 | 2 | 28 |
| 155 | 0 | 0 | 0 | 0 | 0 | 18 |
| 156 | 0 | 0 | 0 | 0 | 0 | 18 |
| 157 | 0 | 0 | 0 | 0 | 0 | 8  |
| 158 | 2 | 5 | 1 | 4 | 2 | 16 |
| 159 | 4 | 6 | 1 | 4 | 2 | 3  |
| 160 | 4 | 6 | 1 | 3 | 2 | 5  |
| 161 | 0 | 0 | 0 | 0 | 0 | 17 |
| 162 | 2 | 6 | 1 | 2 | 2 | 3  |
| 163 | 0 | 0 | 0 | 0 | 0 | 12 |
| 164 | 0 | 0 | 0 | 0 | 0 | 14 |
| 165 | 2 | 5 | 1 | 4 | 2 | 40 |
| 166 | 4 | 6 | 1 | 5 | 2 | 31 |



|     |   |   |   |   |   |    |
|-----|---|---|---|---|---|----|
| 167 | 3 | 6 | 1 | 4 | 3 | 45 |
| 168 | 0 | 0 | 0 | 0 | 0 | 10 |
| 169 | 2 | 5 | 1 | 2 | 2 | 9  |
| 170 | 0 | 0 | 0 | 0 | 0 | 15 |
| 171 | 0 | 0 | 0 | 0 | 0 | 11 |
| 172 | 3 | 6 | 1 | 4 | 3 | 14 |
| 173 | 2 | 5 | 1 | 5 | 2 | 14 |
| 174 | 2 | 5 | 1 | 5 | 2 | 6  |
| 175 | 2 | 5 | 1 | 6 | 2 | 11 |
| 176 | 2 | 5 | 1 | 1 | 2 | 1  |
| 177 | 2 | 5 | 1 | 1 | 2 | 7  |
| 178 | 0 | 0 | 0 | 0 | 0 | 9  |
| 179 | 5 | 5 | 1 | 1 | 2 | 10 |
| 180 | 0 | 0 | 0 | 0 | 0 | 6  |
| 181 | 0 | 0 | 0 | 0 | 0 | 6  |
| 182 | 0 | 0 | 0 | 0 | 0 | 4  |
| 183 | 4 | 6 | 1 | 3 | 2 | 4  |
| 184 | 1 | 7 | 1 | 3 | 2 | 10 |
| 185 | 0 | 0 | 0 | 0 | 0 | 19 |
| 186 | 1 | 7 | 1 | 7 | 3 | 32 |
| 187 | 0 | 0 | 0 | 0 | 0 | 2  |
| 188 | 0 | 0 | 0 | 0 | 0 | 2  |
| 189 | 6 | 5 | 1 | 1 | 2 | 1  |
| 190 | 0 | 0 | 0 | 0 | 0 | 4  |
| 191 | 0 | 0 | 0 | 0 | 0 | 6  |

|     |   |   |   |    |   |    |
|-----|---|---|---|----|---|----|
| 192 | 0 | 0 | 0 | 0  | 0 | 7  |
| 193 | 0 | 0 | 0 | 0  | 0 | 3  |
| 194 | 0 | 0 | 0 | 0  | 0 | 3  |
| 195 | 2 | 6 | 1 | 1  | 2 | 7  |
| 196 | 0 | 0 | 0 | 0  | 0 | 14 |
| 197 | 0 | 0 | 0 | 0  | 0 | 6  |
| 198 | 0 | 0 | 0 | 0  | 0 | 6  |
| 199 | 2 | 7 | 1 | 12 | 3 | 26 |
| 200 | 0 | 0 | 0 | 0  | 0 | 8  |
| 201 | 0 | 0 | 0 | 0  | 0 | 10 |
| 202 | 2 | 6 | 1 | 2  | 2 | 6  |
| 203 | 3 | 6 | 1 | 5  | 1 | 11 |
| 204 | 3 | 6 | 1 | 5  | 2 | 13 |
| 205 | 3 | 6 | 1 | 1  | 2 | 9  |
| 206 | 0 | 0 | 0 | 0  | 0 | 12 |
| 207 | 2 | 6 | 1 | 17 | 2 | 17 |
| 208 | 7 | 6 | 1 | 3  | 2 | 10 |
| 209 | 0 | 0 | 0 | 0  | 0 | 15 |
| 210 | 2 | 5 | 1 | 1  | 2 | 7  |
| 211 | 0 | 0 | 0 | 0  | 0 | 35 |
| 212 | 3 | 6 | 1 | 3  | 2 | 22 |
| 213 | 2 | 6 | 1 | 11 | 2 | 39 |
| 214 | 0 | 0 | 0 | 0  | 0 | 7  |
| 215 | 0 | 0 | 0 | 0  | 0 | 5  |
| 216 | 0 | 0 | 0 | 0  | 0 | 16 |

|     |   |   |   |    |   |    |
|-----|---|---|---|----|---|----|
| 217 | 2 | 6 | 1 | 18 | 2 | 23 |
| 218 | 0 | 0 | 0 | 0  | 0 | 6  |
| 219 | 0 | 0 | 0 | 0  | 0 | 13 |
| 220 | 7 | 6 | 1 | 21 | 2 | 35 |
| 221 | 0 | 0 | 0 | 0  | 0 | 10 |
| 222 | 0 | 0 | 0 | 0  | 0 | 11 |
| 223 | 3 | 6 | 1 | 42 | 2 | 22 |
| 224 | 2 | 9 | 1 | 21 | 2 | 64 |
| 225 | 0 | 0 | 0 | 0  | 0 | 23 |
| 226 | 0 | 0 | 0 | 0  | 0 | 3  |
| 227 | 0 | 0 | 0 | 0  | 0 | 20 |
| 228 | 0 | 0 | 0 | 0  | 0 | 20 |
| 229 | 0 | 0 | 0 | 0  | 0 | 3  |
| 230 | 0 | 0 | 0 | 0  | 0 | 22 |
| 231 | 0 | 0 | 0 | 0  | 0 | 7  |
| 232 | 2 | 7 | 1 | 11 | 2 | 12 |
| 233 | 2 | 7 | 1 | 10 | 2 | 5  |
| 234 | 2 | 8 | 1 | 4  | 2 | 6  |
| 235 | 0 | 0 | 0 | 0  | 0 | 5  |
| 236 | 0 | 0 | 0 | 0  | 0 | 8  |
| 237 | 0 | 0 | 0 | 0  | 0 | 8  |
| 238 | 0 | 0 | 0 | 0  | 0 | 6  |
| 239 | 0 | 0 | 0 | 0  | 0 | 9  |
| 240 | 0 | 0 | 0 | 0  | 0 | 8  |
| 241 | 0 | 0 | 0 | 0  | 0 | 7  |

|     |   |   |   |    |   |    |
|-----|---|---|---|----|---|----|
| 242 | 0 | 0 | 0 | 0  | 0 | 25 |
| 243 | 0 | 0 | 0 | 0  | 0 | 5  |
| 244 | 0 | 0 | 0 | 0  | 0 | 13 |
| 245 | 0 | 0 | 0 | 0  | 0 | 22 |
| 246 | 7 | 6 | 1 | 5  | 3 | 15 |
| 247 | 2 | 7 | 1 | 4  | 2 | 12 |
| 248 | 0 | 0 | 0 | 0  | 0 | 7  |
| 249 | 2 | 7 | 1 | 3  | 2 | 6  |
| 250 | 0 | 0 | 0 | 0  | 0 | 3  |
| 251 | 1 | 7 | 1 | 2  | 2 | 16 |
| 252 | 0 | 0 | 0 | 0  | 0 | 2  |
| 253 | 2 | 8 | 1 | 5  | 2 | 50 |
| 254 | 1 | 7 | 1 | 2  | 2 | 25 |
| 255 | 1 | 7 | 1 | 6  | 2 | 11 |
| 256 | 1 | 7 | 1 | 11 | 2 | 21 |
| 257 | 0 | 0 | 0 | 0  | 0 | 8  |
| 258 | 2 | 5 | 1 | 1  | 2 | 7  |
| 259 | 4 | 6 | 1 | 3  | 3 | 10 |
| 260 | 1 | 7 | 1 | 1  | 2 | 24 |
| 261 | 0 | 0 | 0 | 0  | 0 | 25 |
| 262 | 5 | 6 | 1 | 6  | 2 | 22 |
| 263 | 1 | 7 | 1 | 5  | 2 | 11 |
| 264 | 0 | 0 | 0 | 0  | 0 | 7  |
| 265 | 0 | 0 | 0 | 0  | 0 | 8  |
| 266 | 3 | 6 | 1 | 1  | 2 | 3  |

|     |   |    |   |    |   |    |
|-----|---|----|---|----|---|----|
| 267 | 3 | 6  | 1 | 5  | 2 | 17 |
| 268 | 0 | 0  | 0 | 0  | 0 | 18 |
| 269 | 5 | 5  | 1 | 1  | 2 | 11 |
| 270 | 0 | 0  | 0 | 0  | 0 | 5  |
| 271 | 3 | 6  | 1 | 2  | 2 | 3  |
| 272 | 1 | 7  | 1 | 3  | 2 | 7  |
| 273 | 4 | 6  | 1 | 1  | 2 | 6  |
| 274 | 0 | 0  | 0 | 0  | 0 | 4  |
| 275 | 2 | 8  | 1 | 4  | 3 | 5  |
| 276 | 1 | 7  | 1 | 8  | 2 | 11 |
| 277 | 0 | 0  | 0 | 0  | 0 | 19 |
| 278 | 5 | 6  | 1 | 5  | 2 | 22 |
| 279 | 0 | 0  | 0 | 0  | 0 | 7  |
| 280 | 3 | 6  | 1 | 7  | 2 | 11 |
| 281 | 0 | 0  | 0 | 0  | 0 | 2  |
| 282 | 3 | 6  | 1 | 9  | 2 | 19 |
| 283 | 0 | 0  | 0 | 0  | 0 | 12 |
| 284 | 3 | 6  | 1 | 5  | 2 | 14 |
| 285 | 7 | 6  | 1 | 17 | 3 | 17 |
| 286 | 2 | 10 | 1 | 9  | 3 | 17 |
| 287 | 3 | 6  | 1 | 3  | 2 | 3  |
| 288 | 0 | 0  | 0 | 0  | 0 | 8  |
| 289 | 3 | 6  | 1 | 2  | 2 | 13 |
| 290 | 0 | 0  | 0 | 0  | 0 | 8  |
| 291 | 6 | 5  | 1 | 1  | 2 | 7  |

|     |   |   |   |    |   |    |
|-----|---|---|---|----|---|----|
| 292 | 3 | 6 | 1 | 3  | 2 | 13 |
| 293 | 0 | 0 | 0 | 0  | 0 | 20 |
| 294 | 7 | 6 | 1 | 2  | 2 | 14 |
| 295 | 6 | 6 | 1 | 2  | 2 | 11 |
| 296 | 3 | 5 | 1 | 1  | 2 | 6  |
| 297 | 2 | 7 | 1 | 11 | 2 | 15 |
| 298 | 4 | 6 | 1 | 1  | 2 | 9  |
| 299 | 2 | 7 | 1 | 11 | 2 | 30 |
| 300 | 5 | 6 | 1 | 1  | 2 | 6  |
| 301 | 3 | 6 | 1 | 7  | 2 | 6  |
| 302 | 3 | 6 | 1 | 14 | 2 | 19 |
| 303 | 0 | 0 | 0 | 0  | 0 | 9  |
| 304 | 0 | 0 | 0 | 0  | 0 | 13 |
| 305 | 5 | 6 | 1 | 4  | 3 | 3  |
| 306 | 2 | 7 | 1 | 30 | 3 | 19 |
| 307 | 3 | 6 | 1 | 1  | 2 | 20 |
| 308 | 0 | 0 | 0 | 0  | 0 | 15 |
| 309 | 4 | 6 | 1 | 1  | 3 | 13 |
| 310 | 2 | 7 | 1 | 2  | 2 | 5  |
| 311 | 0 | 0 | 0 | 0  | 0 | 13 |
| 312 | 0 | 0 | 0 | 0  | 0 | 16 |
| 313 | 2 | 5 | 1 | 1  | 3 | 17 |
| 314 | 0 | 0 | 0 | 0  | 0 | 4  |
| 315 | 0 | 0 | 0 | 0  | 0 | 18 |
| 316 | 1 | 7 | 1 | 7  | 2 | 20 |

|     |   |   |   |    |   |    |
|-----|---|---|---|----|---|----|
| 317 | 3 | 6 | 1 | 1  | 3 | 16 |
| 318 | 0 | 0 | 0 | 0  | 0 | 8  |
| 319 | 1 | 7 | 1 | 8  | 2 | 33 |
| 320 | 0 | 0 | 0 | 0  | 0 | 8  |
| 321 | 1 | 7 | 1 | 23 | 2 | 13 |
| 322 | 1 | 7 | 1 | 9  | 2 | 10 |
| 323 | 0 | 0 | 0 | 0  | 0 | 8  |
| 324 | 1 | 7 | 1 | 13 | 2 | 15 |
| 325 | 0 | 0 | 0 | 0  | 0 | 14 |
| 326 | 6 | 6 | 1 | 4  | 2 | 8  |
| 327 | 0 | 0 | 0 | 0  | 0 | 5  |
| 328 | 0 | 0 | 0 | 0  | 0 | 6  |
| 329 | 1 | 7 | 1 | 9  | 2 | 22 |
| 330 | 1 | 7 | 1 | 3  | 2 | 10 |
| 331 | 3 | 6 | 1 | 3  | 2 | 8  |
| 332 | 3 | 6 | 1 | 2  | 2 | 10 |
| 333 | 0 | 0 | 0 | 0  | 0 | 15 |
| 334 | 0 | 0 | 0 | 0  | 0 | 6  |
| 335 | 1 | 7 | 1 | 13 | 2 | 20 |
| 336 | 6 | 6 | 1 | 4  | 2 | 11 |
| 337 | 0 | 0 | 0 | 0  | 0 | 9  |
| 338 | 3 | 6 | 1 | 1  | 2 | 16 |
| 339 | 6 | 5 | 1 | 1  | 2 | 3  |
| 340 | 1 | 7 | 1 | 3  | 2 | 11 |
| 341 | 1 | 7 | 1 | 21 | 2 | 17 |

|     |   |   |   |    |   |    |
|-----|---|---|---|----|---|----|
| 342 | 0 | 0 | 0 | 0  | 0 | 4  |
| 343 | 0 | 0 | 0 | 0  | 0 | 9  |
| 344 | 3 | 6 | 1 | 3  | 2 | 4  |
| 345 | 0 | 0 | 0 | 0  | 0 | 6  |
| 346 | 1 | 7 | 1 | 2  | 2 | 4  |
| 347 | 4 | 6 | 1 | 9  | 2 | 20 |
| 348 | 0 | 0 | 0 | 0  | 0 | 24 |
| 349 | 3 | 6 | 1 | 1  | 2 | 3  |
| 350 | 0 | 0 | 0 | 0  | 0 | 3  |
| 351 | 3 | 6 | 1 | 1  | 2 | 11 |
| 352 | 0 | 0 | 0 | 0  | 0 | 9  |
| 353 | 4 | 6 | 1 | 2  | 2 | 14 |
| 354 | 0 | 0 | 0 | 0  | 0 | 4  |
| 355 | 3 | 6 | 1 | 3  | 2 | 4  |
| 356 | 3 | 6 | 1 | 12 | 2 | 17 |
| 357 | 0 | 0 | 0 | 0  | 0 | 1  |
| 358 | 0 | 0 | 0 | 0  | 0 | 6  |
| 359 | 3 | 6 | 1 | 3  | 2 | 7  |
| 360 | 4 | 5 | 1 | 1  | 2 | 6  |
| 361 | 4 | 5 | 1 | 1  | 2 | 9  |
| 362 | 0 | 0 | 0 | 0  | 0 | 20 |
| 363 | 1 | 7 | 1 | 11 | 2 | 32 |
| 364 | 1 | 7 | 1 | 27 | 2 | 15 |
| 365 | 1 | 7 | 1 | 5  | 2 | 15 |
| 366 | 0 | 0 | 0 | 0  | 0 | 3  |



|     |   |   |   |    |   |    |
|-----|---|---|---|----|---|----|
| 367 | 0 | 0 | 0 | 0  | 0 | 12 |
| 368 | 0 | 0 | 0 | 0  | 0 | 10 |
| 369 | 3 | 6 | 1 | 2  | 2 | 5  |
| 370 | 0 | 0 | 0 | 0  | 0 | 13 |
| 371 | 0 | 0 | 0 | 0  | 0 | 5  |
| 372 | 0 | 0 | 0 | 0  | 0 | 17 |
| 373 | 0 | 0 | 0 | 0  | 0 | 5  |
| 374 | 0 | 0 | 0 | 0  | 0 | 5  |
| 375 | 0 | 0 | 0 | 0  | 0 | 7  |
| 376 | 0 | 0 | 0 | 0  | 0 | 7  |
| 377 | 4 | 6 | 1 | 7  | 2 | 19 |
| 378 | 3 | 6 | 1 | 5  | 2 | 4  |
| 379 | 1 | 7 | 1 | 3  | 2 | 8  |
| 380 | 1 | 7 | 1 | 5  | 2 | 36 |
| 381 | 3 | 5 | 1 | 1  | 2 | 10 |
| 382 | 1 | 7 | 1 | 30 | 2 | 31 |
| 383 | 2 | 7 | 1 | 6  | 2 | 16 |
| 384 | 0 | 0 | 0 | 0  | 0 | 8  |
| 385 | 2 | 7 | 1 | 1  | 2 | 14 |
| 386 | 2 | 7 | 1 | 4  | 2 | 4  |
| 387 | 0 | 0 | 0 | 0  | 0 | 8  |
| 388 | 6 | 6 | 1 | 2  | 2 | 7  |
| 389 | 2 | 7 | 1 | 2  | 2 | 7  |
| 390 | 2 | 7 | 1 | 2  | 2 | 10 |
| 391 | 4 | 6 | 1 | 2  | 2 | 10 |

|     |   |   |   |   |   |    |
|-----|---|---|---|---|---|----|
| 392 | 0 | 0 | 0 | 0 | 0 | 2  |
| 393 | 0 | 0 | 0 | 0 | 0 | 1  |
| 394 | 0 | 0 | 0 | 0 | 0 | 3  |
| 395 | 3 | 6 | 1 | 4 | 2 | 7  |
| 396 | 2 | 5 | 1 | 2 | 2 | 8  |
| 397 | 0 | 0 | 0 | 0 | 0 | 5  |
| 398 | 0 | 0 | 0 | 0 | 0 | 9  |
| 399 | 3 | 6 | 1 | 1 | 2 | 9  |
| 400 | 2 | 5 | 1 | 2 | 2 | 10 |
| 401 | 0 | 0 | 0 | 0 | 0 | 7  |
| 402 | 2 | 7 | 1 | 7 | 3 | 20 |
| 403 | 1 | 7 | 1 | 2 | 2 | 12 |
| 404 | 3 | 6 | 1 | 3 | 1 | 7  |
| 405 | 0 | 0 | 0 | 0 | 0 | 7  |
| 406 | 0 | 0 | 0 | 0 | 0 | 16 |
| 407 | 3 | 6 | 1 | 1 | 3 | 9  |
| 408 | 4 | 6 | 1 | 2 | 2 | 8  |
| 409 | 0 | 0 | 0 | 0 | 0 | 8  |
| 410 | 3 | 6 | 1 | 5 | 2 | 10 |
| 411 | 0 | 0 | 0 | 0 | 0 | 6  |
| 412 | 0 | 0 | 0 | 0 | 0 | 11 |
| 413 | 0 | 0 | 0 | 0 | 0 | 5  |
| 414 | 0 | 0 | 0 | 0 | 0 | 7  |
| 415 | 4 | 6 | 1 | 2 | 2 | 7  |
| 416 | 1 | 7 | 1 | 3 | 2 | 8  |

|     |   |   |   |    |   |    |
|-----|---|---|---|----|---|----|
| 417 | 0 | 0 | 0 | 0  | 0 | 10 |
| 418 | 0 | 0 | 0 | 0  | 0 | 10 |
| 419 | 0 | 0 | 0 | 0  | 0 | 22 |
| 420 | 1 | 7 | 1 | 2  | 2 | 15 |
| 421 | 1 | 7 | 1 | 4  | 3 | 6  |
| 422 | 4 | 6 | 1 | 5  | 1 | 21 |
| 423 | 3 | 6 | 1 | 4  | 2 | 11 |
| 424 | 0 | 0 | 0 | 0  | 0 | 8  |
| 425 | 1 | 7 | 1 | 21 | 2 | 8  |
| 426 | 0 | 0 | 0 | 0  | 0 | 1  |
| 427 | 0 | 0 | 0 | 0  | 0 | 9  |
| 428 | 1 | 7 | 1 | 35 | 2 | 22 |
| 429 | 1 | 7 | 1 | 2  | 2 | 4  |
| 430 | 0 | 0 | 0 | 0  | 0 | 9  |
| 431 | 3 | 6 | 1 | 2  | 2 | 24 |
| 432 | 0 | 0 | 0 | 0  | 0 | 27 |
| 433 | 2 | 5 | 1 | 1  | 2 | 9  |
| 434 | 4 | 5 | 1 | 1  | 2 | 15 |
| 435 | 1 | 7 | 1 | 3  | 2 | 3  |
| 436 | 4 | 6 | 1 | 4  | 2 | 9  |
| 437 | 0 | 0 | 0 | 0  | 0 | 3  |
| 438 | 1 | 7 | 1 | 5  | 2 | 7  |
| 439 | 0 | 0 | 0 | 0  | 0 | 24 |
| 440 | 1 | 7 | 1 | 1  | 2 | 13 |
| 441 | 3 | 6 | 1 | 3  | 2 | 13 |

|     |   |   |   |   |   |    |
|-----|---|---|---|---|---|----|
| 442 | 0 | 0 | 0 | 0 | 0 | 16 |
| 443 | 0 | 0 | 0 | 0 | 0 | 8  |
| 444 | 7 | 6 | 1 | 8 | 2 | 14 |
| 445 | 0 | 0 | 0 | 0 | 0 | 6  |
| 446 | 3 | 6 | 1 | 1 | 2 | 7  |
| 447 | 3 | 6 | 1 | 1 | 2 | 7  |
| 448 | 5 | 5 | 1 | 1 | 2 | 12 |
| 449 | 3 | 6 | 1 | 2 | 2 | 23 |
| 450 | 0 | 0 | 0 | 0 | 0 | 10 |
| 451 | 0 | 0 | 0 | 0 | 0 | 4  |
| 452 | 7 | 5 | 1 | 3 | 2 | 10 |
| 453 | 3 | 6 | 1 | 1 | 2 | 4  |
| 454 | 1 | 7 | 1 | 6 | 2 | 10 |
| 455 | 0 | 0 | 0 | 0 | 0 | 13 |
| 456 | 0 | 0 | 0 | 0 | 0 | 32 |
| 457 | 0 | 0 | 0 | 0 | 0 | 7  |
| 458 | 0 | 0 | 0 | 0 | 0 | 11 |
| 459 | 3 | 6 | 1 | 1 | 1 | 7  |
| 460 | 0 | 0 | 0 | 0 | 0 | 5  |
| 461 | 1 | 7 | 1 | 4 | 2 | 7  |
| 462 | 3 | 6 | 1 | 1 | 2 | 12 |
| 463 | 0 | 0 | 0 | 0 | 0 | 15 |
| 464 | 0 | 0 | 0 | 0 | 0 | 4  |
| 465 | 7 | 6 | 1 | 1 | 2 | 8  |
| 466 | 1 | 7 | 1 | 4 | 2 | 9  |

|     |   |   |   |    |   |    |
|-----|---|---|---|----|---|----|
| 467 | 0 | 0 | 0 | 0  | 0 | 3  |
| 468 | 0 | 0 | 0 | 0  | 0 | 7  |
| 469 | 1 | 7 | 1 | 3  | 2 | 21 |
| 470 | 3 | 6 | 1 | 2  | 2 | 12 |
| 471 | 0 | 0 | 0 | 0  | 0 | 19 |
| 472 | 2 | 8 | 1 | 3  | 2 | 14 |
| 473 | 3 | 6 | 1 | 4  | 2 | 8  |
| 474 | 0 | 0 | 0 | 0  | 0 | 2  |
| 475 | 7 | 6 | 1 | 1  | 2 | 3  |
| 476 | 0 | 0 | 0 | 0  | 0 | 2  |
| 477 | 0 | 0 | 0 | 0  | 0 | 3  |
| 478 | 0 | 0 | 0 | 0  | 0 | 11 |
| 479 | 0 | 0 | 0 | 0  | 0 | 10 |
| 480 | 1 | 7 | 1 | 2  | 1 | 6  |
| 481 | 1 | 7 | 1 | 10 | 3 | 9  |
| 482 | 3 | 6 | 1 | 4  | 3 | 9  |
| 483 | 0 | 0 | 0 | 0  | 0 | 9  |
| 484 | 1 | 7 | 1 | 8  | 2 | 9  |
| 485 | 0 | 0 | 0 | 0  | 0 | 5  |
| 486 | 2 | 8 | 1 | 23 | 2 | 4  |
| 487 | 1 | 7 | 1 | 2  | 2 | 2  |
| 488 | 0 | 0 | 0 | 0  | 0 | 1  |
| 489 | 1 | 7 | 1 | 1  | 3 | 8  |
| 490 | 0 | 0 | 0 | 0  | 0 | 9  |
| 491 | 2 | 8 | 1 | 3  | 2 | 28 |

|     |   |   |   |    |   |    |
|-----|---|---|---|----|---|----|
| 492 | 1 | 7 | 1 | 1  | 2 | 6  |
| 493 | 5 | 6 | 1 | 2  | 2 | 12 |
| 494 | 1 | 7 | 1 | 2  | 2 | 23 |
| 495 | 0 | 0 | 0 | 0  | 0 | 14 |
| 496 | 1 | 7 | 1 | 1  | 2 | 14 |
| 497 | 2 | 8 | 1 | 12 | 2 | 24 |
| 498 | 1 | 7 | 1 | 10 | 2 | 14 |
| 499 | 5 | 6 | 1 | 3  | 2 | 18 |
| 500 | 0 | 0 | 0 | 0  | 0 | 10 |
| 501 | 2 | 8 | 1 | 1  | 2 | 11 |
| 502 | 7 | 6 | 1 | 6  | 2 | 12 |
| 503 | 1 | 7 | 1 | 5  | 2 | 11 |
| 504 | 2 | 8 | 1 | 13 | 1 | 33 |
| 505 | 2 | 8 | 1 | 4  | 2 | 9  |
| 506 | 0 | 0 | 0 | 0  | 0 | 6  |
| 507 | 7 | 6 | 1 | 1  | 2 | 7  |
| 508 | 0 | 0 | 0 | 0  | 0 | 15 |
| 509 | 3 | 6 | 1 | 2  | 2 | 8  |
| 510 | 3 | 6 | 1 | 1  | 2 | 8  |
| 511 | 0 | 0 | 0 | 0  | 0 | 9  |
| 512 | 0 | 0 | 0 | 0  | 0 | 2  |
| 513 | 4 | 5 | 1 | 1  | 2 | 19 |
| 514 | 0 | 0 | 0 | 0  | 0 | 10 |
| 515 | 0 | 0 | 0 | 0  | 0 | 2  |
| 516 | 0 | 0 | 0 | 0  | 0 | 3  |

|     |   |   |   |    |   |    |
|-----|---|---|---|----|---|----|
| 517 | 0 | 0 | 0 | 0  | 0 | 6  |
| 518 | 3 | 6 | 1 | 2  | 2 | 3  |
| 519 | 0 | 0 | 0 | 0  | 0 | 5  |
| 520 | 0 | 0 | 0 | 0  | 0 | 8  |
| 521 | 0 | 0 | 0 | 0  | 0 | 9  |
| 522 | 0 | 0 | 0 | 0  | 0 | 15 |
| 523 | 4 | 6 | 1 | 6  | 2 | 24 |
| 524 | 0 | 0 | 0 | 0  | 0 | 8  |
| 525 | 3 | 6 | 1 | 5  | 2 | 7  |
| 526 | 4 | 6 | 1 | 4  | 2 | 19 |
| 527 | 0 | 0 | 0 | 0  | 0 | 27 |
| 528 | 0 | 0 | 0 | 0  | 0 | 2  |
| 529 | 0 | 0 | 0 | 0  | 0 | 3  |
| 530 | 0 | 0 | 0 | 0  | 0 | 4  |
| 531 | 0 | 0 | 0 | 0  | 0 | 12 |
| 532 | 1 | 7 | 1 | 10 | 2 | 21 |
| 533 | 0 | 0 | 0 | 0  | 0 | 6  |
| 534 | 0 | 0 | 0 | 0  | 0 | 10 |
| 535 | 1 | 7 | 1 | 1  | 1 | 11 |
| 536 | 1 | 7 | 1 | 5  | 2 | 48 |
| 537 | 3 | 6 | 1 | 4  | 2 | 12 |
| 538 | 0 | 0 | 0 | 0  | 0 | 14 |
| 539 | 1 | 7 | 1 | 4  | 3 | 51 |
| 540 | 0 | 0 | 0 | 0  | 0 | 10 |
| 541 | 0 | 0 | 0 | 0  | 0 | 11 |

|     |   |   |   |    |   |    |
|-----|---|---|---|----|---|----|
| 542 | 0 | 0 | 0 | 0  | 0 | 8  |
| 543 | 0 | 0 | 0 | 0  | 0 | 9  |
| 544 | 0 | 0 | 0 | 0  | 0 | 16 |
| 545 | 1 | 7 | 1 | 10 | 3 | 14 |
| 546 | 3 | 6 | 1 | 2  | 2 | 8  |
| 547 | 3 | 6 | 1 | 9  | 2 | 9  |
| 548 | 0 | 0 | 0 | 0  | 0 | 15 |
| 549 | 7 | 5 | 1 | 1  | 2 | 10 |
| 550 | 1 | 7 | 1 | 5  | 2 | 13 |
| 551 | 0 | 0 | 0 | 0  | 0 | 5  |
| 552 | 1 | 7 | 1 | 24 | 2 | 34 |
| 553 | 3 | 6 | 1 | 2  | 2 | 19 |
| 554 | 1 | 7 | 1 | 5  | 2 | 7  |
| 555 | 2 | 8 | 1 | 1  | 3 | 8  |
| 556 | 1 | 7 | 1 | 2  | 2 | 7  |
| 557 | 1 | 7 | 1 | 6  | 2 | 15 |
| 558 | 7 | 6 | 1 | 3  | 2 | 7  |
| 559 | 1 | 7 | 1 | 8  | 2 | 11 |
| 560 | 2 | 8 | 1 | 3  | 2 | 18 |
| 561 | 0 | 0 | 0 | 0  | 0 | 3  |
| 562 | 0 | 0 | 0 | 0  | 0 | 49 |
| 563 | 0 | 0 | 0 | 0  | 0 | 19 |
| 564 | 0 | 0 | 0 | 0  | 0 | 10 |
| 565 | 1 | 7 | 1 | 3  | 2 | 5  |
| 566 | 0 | 0 | 0 | 0  | 0 | 14 |



|     |   |   |   |   |   |    |
|-----|---|---|---|---|---|----|
| 567 | 0 | 0 | 0 | 0 | 0 | 9  |
| 568 | 1 | 7 | 1 | 9 | 2 | 14 |
| 569 | 0 | 0 | 0 | 0 | 0 | 9  |
| 570 | 1 | 7 | 1 | 3 | 2 | 16 |
| 571 | 1 | 7 | 1 | 9 | 2 | 15 |
| 572 | 5 | 5 | 1 | 1 | 2 | 7  |
| 573 | 0 | 0 | 0 | 0 | 0 | 6  |
| 574 | 0 | 0 | 0 | 0 | 0 | 3  |
| 575 | 0 | 0 | 0 | 0 | 0 | 3  |
| 576 | 2 | 8 | 1 | 1 | 3 | 8  |
| 577 | 0 | 0 | 0 | 0 | 0 | 12 |
| 578 | 1 | 7 | 1 | 3 | 2 | 1  |
| 579 | 5 | 6 | 1 | 1 | 2 | 11 |
| 580 | 3 | 6 | 1 | 1 | 2 | 3  |
| 581 | 0 | 0 | 0 | 0 | 0 | 16 |
| 582 | 0 | 0 | 0 | 0 | 0 | 4  |
| 583 | 0 | 0 | 0 | 0 | 0 | 5  |
| 584 | 0 | 0 | 0 | 0 | 0 | 7  |
| 585 | 0 | 0 | 0 | 0 | 0 | 7  |
| 586 | 4 | 6 | 1 | 1 | 2 | 4  |
| 587 | 4 | 5 | 1 | 2 | 2 | 20 |
| 588 | 0 | 0 | 0 | 0 | 0 | 5  |
| 589 | 4 | 5 | 1 | 1 | 1 | 22 |
| 590 | 4 | 6 | 1 | 1 | 2 | 2  |
| 591 | 1 | 7 | 1 | 4 | 2 | 23 |

|     |   |   |   |   |   |    |
|-----|---|---|---|---|---|----|
| 592 | 0 | 0 | 0 | 0 | 0 | 3  |
| 593 | 1 | 7 | 1 | 4 | 2 | 15 |
| 594 | 1 | 7 | 1 | 8 | 2 | 20 |
| 595 | 7 | 6 | 1 | 2 | 2 | 18 |
| 596 | 0 | 0 | 0 | 0 | 0 | 7  |
| 597 | 0 | 0 | 0 | 0 | 0 | 17 |
| 598 | 0 | 0 | 0 | 0 | 0 | 9  |
| 599 | 0 | 0 | 0 | 0 | 0 | 10 |
| 600 | 0 | 0 | 0 | 0 | 0 | 8  |
| 601 | 0 | 0 | 0 | 0 | 0 | 8  |
| 602 | 0 | 0 | 0 | 0 | 0 | 8  |
| 603 | 1 | 7 | 1 | 2 | 2 | 31 |
| 604 | 0 | 0 | 0 | 0 | 0 | 3  |
| 605 | 0 | 0 | 0 | 0 | 0 | 14 |
| 606 | 0 | 0 | 0 | 0 | 0 | 7  |
| 607 | 0 | 0 | 0 | 0 | 0 | 11 |
| 608 | 0 | 0 | 0 | 0 | 0 | 51 |
| 609 | 0 | 0 | 0 | 0 | 0 | 15 |
| 610 | 3 | 6 | 1 | 2 | 2 | 6  |
| 611 | 1 | 7 | 1 | 7 | 2 | 20 |
| 612 | 0 | 0 | 0 | 0 | 0 | 23 |
| 613 | 5 | 6 | 1 | 5 | 2 | 25 |
| 614 | 0 | 0 | 0 | 0 | 0 | 10 |
| 615 | 0 | 0 | 0 | 0 | 0 | 3  |
| 616 | 0 | 0 | 0 | 0 | 0 | 3  |

|     |   |   |   |    |   |    |
|-----|---|---|---|----|---|----|
| 617 | 0 | 0 | 0 | 0  | 0 | 8  |
| 618 | 4 | 6 | 1 | 1  | 2 | 31 |
| 619 | 3 | 6 | 1 | 6  | 2 | 18 |
| 620 | 4 | 5 | 1 | 2  | 2 | 28 |
| 621 | 0 | 0 | 0 | 0  | 0 | 4  |
| 622 | 1 | 7 | 1 | 1  | 3 | 9  |
| 623 | 0 | 0 | 0 | 0  | 0 | 25 |
| 624 | 1 | 7 | 1 | 4  | 2 | 13 |
| 625 | 1 | 7 | 1 | 11 | 2 | 17 |
| 626 | 1 | 7 | 1 | 7  | 3 | 6  |
| 627 | 1 | 7 | 1 | 4  | 2 | 11 |
| 628 | 0 | 0 | 0 | 0  | 0 | 2  |
| 629 | 0 | 0 | 0 | 0  | 0 | 7  |
| 630 | 0 | 0 | 0 | 0  | 0 | 6  |
| 631 | 1 | 7 | 1 | 6  | 2 | 11 |
| 632 | 0 | 0 | 0 | 0  | 0 | 9  |
| 633 | 0 | 0 | 0 | 0  | 0 | 6  |
| 634 | 0 | 0 | 0 | 0  | 0 | 9  |
| 635 | 0 | 0 | 0 | 0  | 0 | 8  |
| 636 | 1 | 7 | 1 | 3  | 2 | 14 |
| 637 | 0 | 0 | 0 | 0  | 0 | 1  |
| 638 | 1 | 7 | 1 | 4  | 2 | 12 |
| 639 | 0 | 0 | 0 | 0  | 0 | 17 |
| 640 | 0 | 0 | 0 | 0  | 0 | 23 |
| 641 | 0 | 0 | 0 | 0  | 0 | 7  |

|     |   |   |   |    |   |    |
|-----|---|---|---|----|---|----|
| 642 | 3 | 6 | 1 | 2  | 2 | 7  |
| 643 | 0 | 0 | 0 | 0  | 0 | 7  |
| 644 | 1 | 7 | 1 | 13 | 2 | 30 |
| 645 | 1 | 7 | 1 | 11 | 2 | 21 |
| 646 | 1 | 7 | 1 | 14 | 3 | 23 |
| 647 | 1 | 7 | 1 | 9  | 2 | 6  |
| 648 | 0 | 0 | 0 | 0  | 0 | 11 |
| 649 | 0 | 0 | 0 | 0  | 0 | 3  |
| 650 | 0 | 0 | 0 | 0  | 0 | 8  |
| 651 | 4 | 6 | 1 | 2  | 3 | 8  |
| 652 | 0 | 0 | 0 | 0  | 0 | 4  |
| 653 | 1 | 7 | 1 | 3  | 3 | 5  |
| 654 | 4 | 6 | 1 | 6  | 2 | 13 |
| 655 | 3 | 6 | 1 | 1  | 2 | 22 |
| 656 | 0 | 0 | 0 | 0  | 0 | 6  |
| 657 | 7 | 5 | 1 | 1  | 3 | 1  |
| 658 | 0 | 0 | 0 | 0  | 0 | 5  |
| 659 | 6 | 5 | 1 | 1  | 2 | 7  |
| 660 | 6 | 5 | 1 | 1  | 2 | 23 |
| 661 | 1 | 7 | 1 | 10 | 2 | 19 |
| 662 | 6 | 6 | 1 | 1  | 2 | 10 |
| 663 | 1 | 7 | 1 | 3  | 3 | 5  |
| 664 | 4 | 6 | 1 | 2  | 2 | 11 |
| 665 | 0 | 0 | 0 | 0  | 0 | 5  |
| 666 | 1 | 7 | 1 | 5  | 2 | 26 |

|     |   |   |   |   |   |    |
|-----|---|---|---|---|---|----|
| 667 | 0 | 0 | 0 | 0 | 0 | 11 |
| 668 | 4 | 5 | 1 | 1 | 2 | 10 |
| 669 | 4 | 6 | 1 | 6 | 3 | 9  |
| 670 | 6 | 6 | 1 | 2 | 2 | 8  |
| 671 | 0 | 0 | 0 | 0 | 0 | 12 |
| 672 | 0 | 0 | 0 | 0 | 0 | 8  |
| 673 | 0 | 0 | 0 | 0 | 0 | 13 |
| 674 | 0 | 0 | 0 | 0 | 0 | 4  |
| 675 | 1 | 7 | 1 | 4 | 5 | 7  |
| 676 | 0 | 0 | 0 | 0 | 0 | 7  |
| 677 | 0 | 0 | 0 | 0 | 0 | 7  |
| 678 | 0 | 0 | 0 | 0 | 0 | 5  |
| 679 | 0 | 0 | 0 | 0 | 0 | 21 |
| 680 | 0 | 0 | 0 | 0 | 0 | 10 |
| 681 | 5 | 6 | 1 | 2 | 2 | 9  |
| 682 | 0 | 0 | 0 | 0 | 0 | 2  |
| 683 | 0 | 0 | 0 | 0 | 0 | 7  |
| 684 | 0 | 0 | 0 | 0 | 0 | 11 |
| 685 | 1 | 7 | 1 | 7 | 3 | 22 |
| 686 | 1 | 7 | 1 | 2 | 3 | 9  |
| 687 | 1 | 7 | 1 | 4 | 3 | 20 |
| 688 | 5 | 5 | 1 | 2 | 2 | 9  |
| 689 | 0 | 0 | 0 | 0 | 0 | 24 |
| 690 | 0 | 0 | 0 | 0 | 0 | 1  |
| 691 | 1 | 7 | 1 | 8 | 3 | 11 |

|     |   |   |   |    |   |    |
|-----|---|---|---|----|---|----|
| 692 | 1 | 7 | 1 | 12 | 3 | 40 |
| 693 | 0 | 0 | 0 | 0  | 0 | 5  |
| 694 | 2 | 8 | 1 | 8  | 4 | 10 |
| 695 | 3 | 6 | 1 | 4  | 2 | 29 |
| 696 | 2 | 9 | 1 | 7  | 3 | 7  |
| 697 | 0 | 0 | 0 | 0  | 0 | 7  |
| 698 | 5 | 5 | 1 | 2  | 2 | 11 |
| 699 | 0 | 0 | 0 | 0  | 0 | 12 |
| 700 | 5 | 6 | 1 | 1  | 2 | 18 |
| 701 | 6 | 5 | 1 | 1  | 2 | 17 |
| 702 | 0 | 0 | 0 | 0  | 0 | 14 |
| 703 | 3 | 6 | 1 | 3  | 2 | 14 |
| 704 | 0 | 0 | 0 | 0  | 0 | 7  |
| 705 | 0 | 0 | 0 | 0  | 0 | 6  |
| 706 | 6 | 6 | 1 | 4  | 2 | 17 |
| 707 | 0 | 0 | 0 | 0  | 0 | 7  |
| 708 | 1 | 7 | 1 | 15 | 3 | 8  |
| 709 | 6 | 6 | 1 | 3  | 2 | 10 |
| 710 | 0 | 0 | 0 | 0  | 0 | 8  |
| 711 | 0 | 0 | 0 | 0  | 0 | 1  |
| 712 | 1 | 7 | 1 | 20 | 2 | 30 |
| 713 | 7 | 6 | 1 | 2  | 3 | 4  |
| 714 | 7 | 5 | 1 | 1  | 2 | 8  |
| 715 | 7 | 5 | 1 | 1  | 3 | 2  |
| 716 | 0 | 0 | 0 | 0  | 0 | 1  |

|     |   |   |   |    |   |    |
|-----|---|---|---|----|---|----|
| 717 | 1 | 7 | 1 | 1  | 2 | 8  |
| 718 | 0 | 0 | 0 | 0  | 0 | 8  |
| 719 | 1 | 7 | 1 | 1  | 2 | 8  |
| 720 | 1 | 7 | 1 | 6  | 3 | 10 |
| 721 | 7 | 5 | 1 | 1  | 3 | 7  |
| 722 | 0 | 0 | 0 | 0  | 0 | 24 |
| 723 | 7 | 5 | 1 | 2  | 3 | 13 |
| 724 | 0 | 0 | 0 | 0  | 0 | 13 |
| 725 | 0 | 0 | 0 | 0  | 0 | 7  |
| 726 | 1 | 7 | 1 | 10 | 2 | 16 |
| 727 | 6 | 6 | 1 | 4  | 2 | 8  |
| 728 | 0 | 0 | 0 | 0  | 0 | 5  |
| 729 | 1 | 7 | 1 | 9  | 2 | 22 |
| 730 | 6 | 5 | 1 | 1  | 2 | 10 |
| 731 | 0 | 0 | 0 | 0  | 0 | 12 |
| 732 | 1 | 7 | 1 | 8  | 3 | 12 |
| 733 | 0 | 0 | 0 | 0  | 0 | 5  |
| 734 | 0 | 0 | 0 | 0  | 0 | 6  |
| 735 | 6 | 6 | 1 | 4  | 2 | 7  |
| 736 | 0 | 0 | 0 | 0  | 0 | 4  |
| 737 | 0 | 0 | 0 | 0  | 0 | 13 |
| 738 | 0 | 0 | 0 | 0  | 0 | 4  |
| 739 | 0 | 0 | 0 | 0  | 0 | 14 |
| 740 | 1 | 7 | 1 | 3  | 2 | 17 |
| 741 | 0 | 0 | 0 | 0  | 0 | 7  |

|     |   |   |   |    |   |    |
|-----|---|---|---|----|---|----|
| 742 | 3 | 5 | 1 | 1  | 3 | 6  |
| 743 | 5 | 6 | 1 | 16 | 2 | 12 |
| 744 | 0 | 0 | 0 | 0  | 0 | 31 |
| 745 | 0 | 0 | 0 | 0  | 0 | 3  |
| 746 | 0 | 0 | 0 | 0  | 0 | 12 |
| 747 | 3 | 7 | 1 | 4  | 3 | 48 |
| 748 | 2 | 7 | 1 | 3  | 3 | 8  |
| 749 | 0 | 0 | 0 | 0  | 0 | 8  |
| 750 | 2 | 7 | 1 | 3  | 2 | 6  |
| 751 | 0 | 0 | 0 | 0  | 0 | 4  |
| 752 | 0 | 0 | 0 | 0  | 0 | 5  |
| 753 | 2 | 5 | 1 | 1  | 2 | 8  |
| 754 | 0 | 0 | 0 | 0  | 0 | 9  |
| 755 | 0 | 0 | 0 | 0  | 0 | 2  |
| 756 | 0 | 0 | 0 | 0  | 0 | 5  |
| 757 | 5 | 5 | 1 | 2  | 2 | 7  |
| 758 | 0 | 0 | 0 | 0  | 0 | 1  |
| 759 | 3 | 6 | 1 | 5  | 2 | 7  |
| 760 | 0 | 0 | 0 | 0  | 0 | 1  |
| 761 | 0 | 0 | 0 | 0  | 0 | 6  |
| 762 | 0 | 0 | 0 | 0  | 0 | 2  |
| 763 | 0 | 0 | 0 | 0  | 0 | 19 |
| 764 | 0 | 0 | 0 | 0  | 0 | 8  |
| 765 | 5 | 5 | 1 | 1  | 2 | 14 |
| 766 | 0 | 0 | 0 | 0  | 0 | 7  |



|     |   |   |   |    |   |    |
|-----|---|---|---|----|---|----|
| 767 | 0 | 0 | 0 | 0  | 0 | 18 |
| 768 | 0 | 0 | 0 | 0  | 0 | 15 |
| 769 | 0 | 0 | 0 | 0  | 0 | 14 |
| 770 | 2 | 7 | 1 | 5  | 2 | 11 |
| 771 | 0 | 0 | 0 | 0  | 0 | 13 |
| 772 | 0 | 0 | 0 | 0  | 0 | 20 |
| 773 | 0 | 0 | 0 | 0  | 0 | 6  |
| 774 | 0 | 0 | 0 | 0  | 0 | 13 |
| 775 | 3 | 7 | 1 | 3  | 2 | 15 |
| 776 | 0 | 0 | 0 | 0  | 0 | 4  |
| 777 | 5 | 7 | 1 | 16 | 2 | 38 |
| 778 | 0 | 0 | 0 | 0  | 0 | 8  |
| 779 | 2 | 7 | 1 | 12 | 2 | 22 |
| 780 | 3 | 6 | 1 | 4  | 2 | 13 |
| 781 | 6 | 6 | 1 | 3  | 2 | 9  |
| 782 | 2 | 7 | 1 | 5  | 2 | 8  |
| 783 | 2 | 7 | 1 | 2  | 3 | 2  |
| 784 | 0 | 0 | 0 | 0  | 0 | 11 |
| 785 | 3 | 6 | 1 | 2  | 3 | 1  |
| 786 | 2 | 7 | 1 | 2  | 2 | 9  |
| 787 | 0 | 0 | 0 | 0  | 0 | 7  |
| 788 | 0 | 0 | 0 | 0  | 0 | 6  |
| 789 | 2 | 7 | 1 | 1  | 2 | 7  |
| 790 | 2 | 7 | 1 | 2  | 2 | 6  |
| 791 | 0 | 0 | 0 | 0  | 0 | 24 |

|     |   |   |   |   |   |    |
|-----|---|---|---|---|---|----|
| 792 | 3 | 7 | 1 | 6 | 2 | 18 |
| 793 | 0 | 0 | 0 | 0 | 0 | 6  |
| 794 | 6 | 7 | 1 | 3 | 2 | 14 |
| 795 | 2 | 6 | 1 | 1 | 2 | 10 |
| 796 | 2 | 5 | 1 | 2 | 2 | 11 |
| 797 | 2 | 7 | 1 | 5 | 2 | 19 |
| 798 | 3 | 7 | 1 | 6 | 2 | 8  |
